# Supplementary material
Source: PubMed Central journal article supplement (PMC7082892)
Supplement: NIHMS1547922-supplement-1.pdf [file NIHMS1547922-supplement-1.pdf]

**Supplementary figure 1: Obese patients in the COMPARZ cohort have improved PFS compared to normal weight patients.**  
 Kaplan-Meier curve suggesting differences in PFS between obese and normal weight patients in the COMPARZ clinical trial.  
 PFS=progression-free survival.

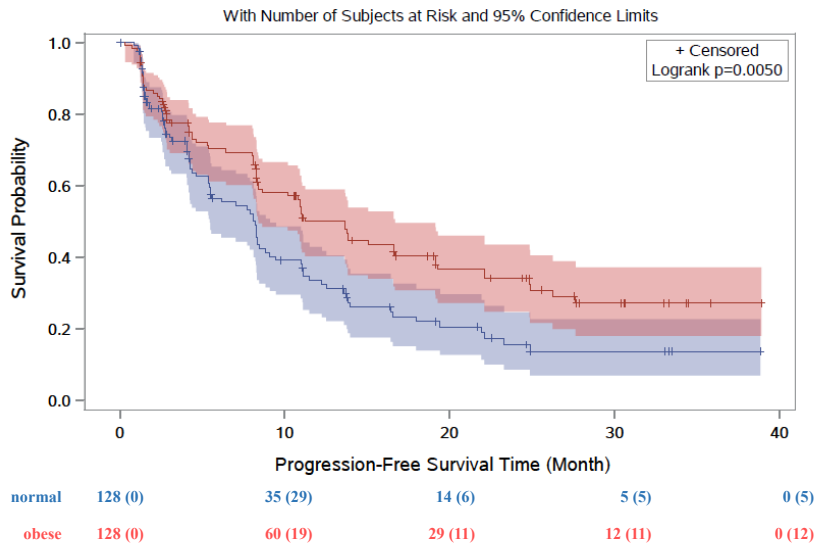

**Supplementary figure 2 (A-B): COMPARZ analysis of overall survival by BMI stratified by treatment arm.**  
 Kaplan-Meier curves demonstrating differences in OS between obese vs. normal weight patients in the COMPARZ clinical trial treated with (A) sunitinib and (B) pazopanib. OS=overall survival. BMI=body mass index. The survival advantage of obese is more pronounced in the Sunitinib arm than the Pazopanib arm.

**A**

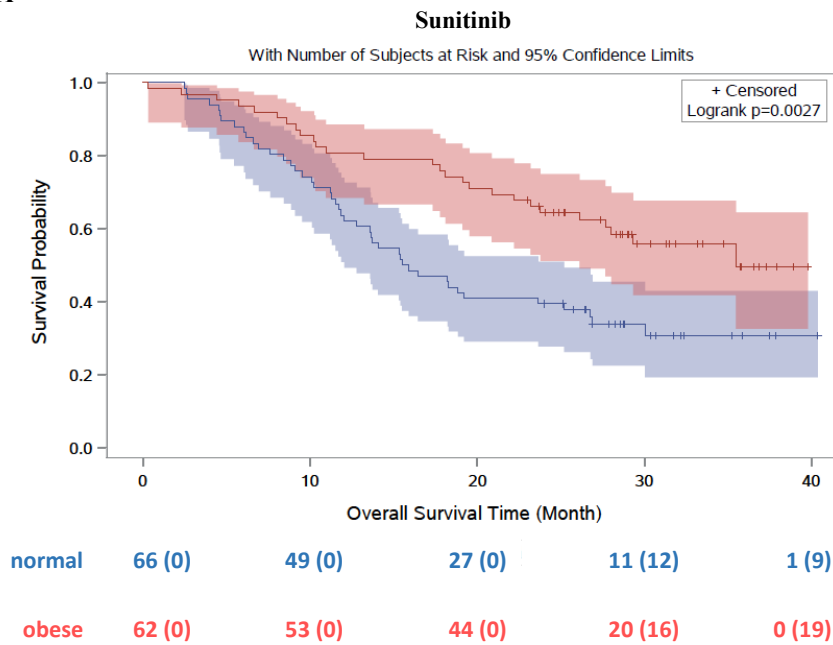

**B**

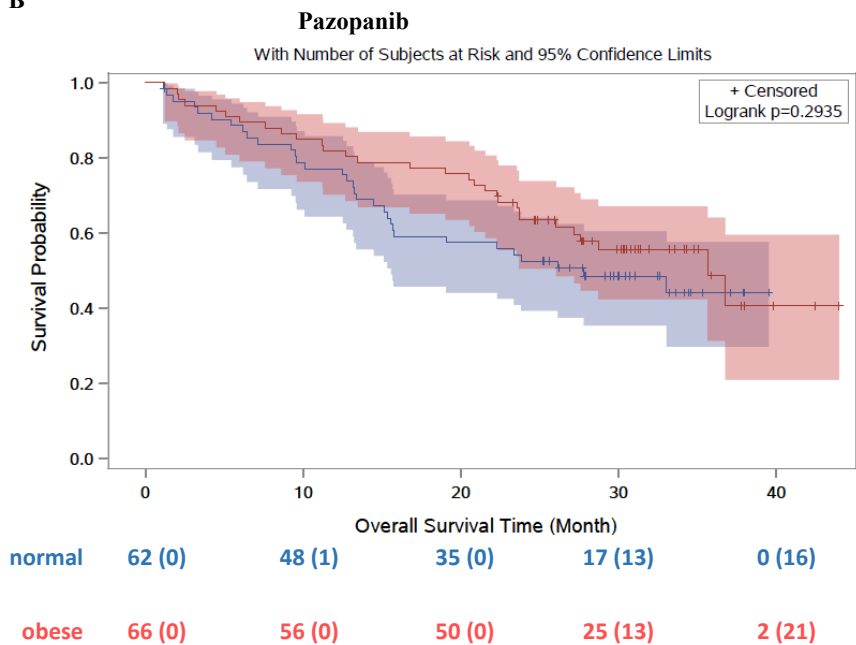

**Supplementary Figure 3 (A-C): Obesity is associated with improved survival outcomes in the TCGA, COMPARZ, and MSK immunotherapy (IO) cohorts by three BMI categories**

Unadjusted Kaplan-Meier curves demonstrating differences in OS between normal and obese patients in the (A) TCGA, (B) COMPARZ, and (C) MSK immunotherapy (IO) cohorts. HR=hazard ratio. aHR = adjusted HR. CI=confidence interval. OS=overall survival. TCGA=The Cancer Genome Atlas clear cell kidney cancer. MSK=Memorial Sloan Kettering. NR=not reached.

\*TCGA cohort was adjusted for stage and grade. COMPARZ and MSK IO cohorts adjusted for IMDC alone.

^The association of BMI with overall survival in the MSK IO cohort was no longer statistically significant after adjustment for IMDC.

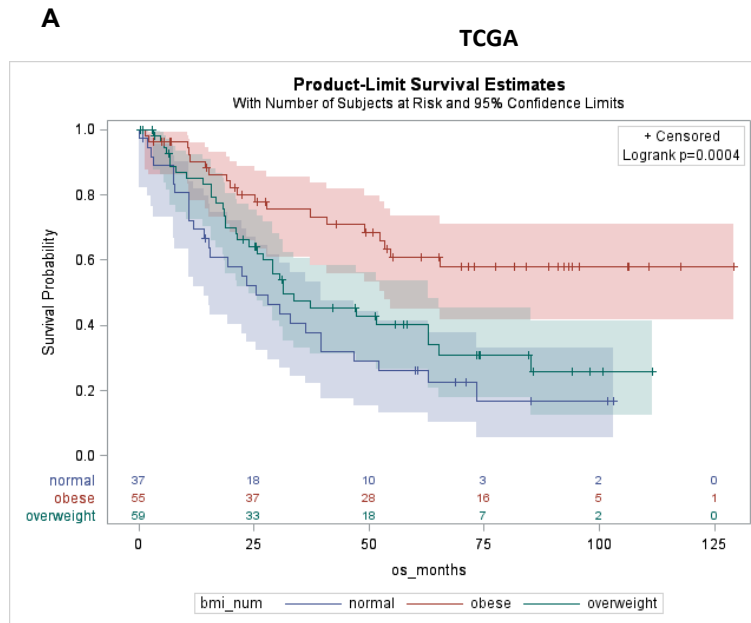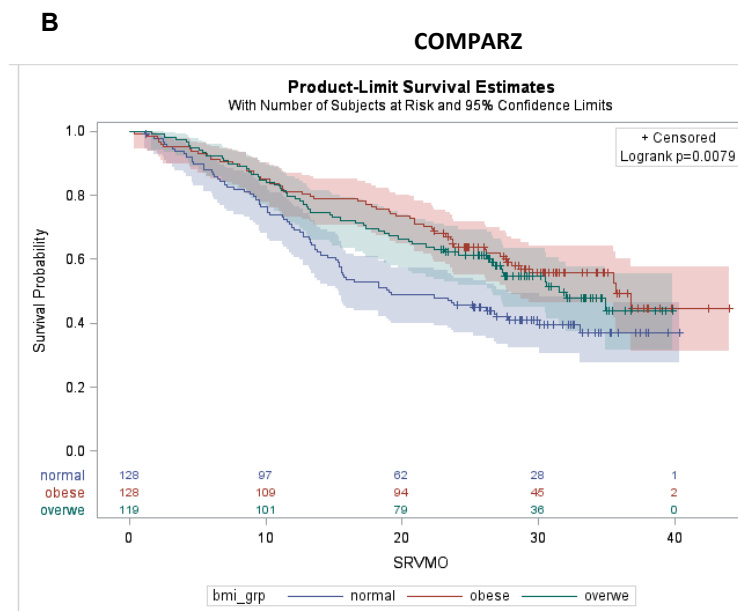

C

MSK IO

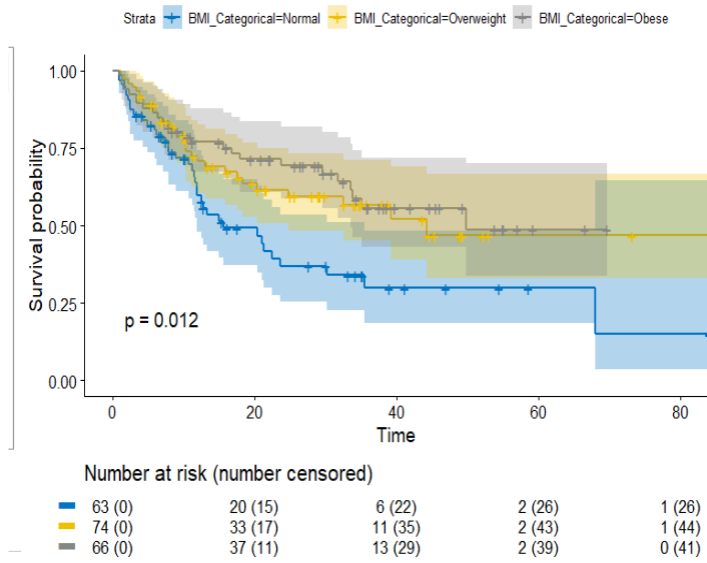

**Supplementary Figure 4 (A-B): ccRCC tumors among obese patients in the COMPARZ cohort harbor significantly different transcriptomic gene signatures compared to normal weight patients**

(A) GSEA analysis of Hallmark gene sets comparing differences between obese versus normal weight patients. Specific pathways of interest are italicized and underlined in the legend (B) Enrichment plots for gene expression pathways highlighted in (A). Enrichment scores are ranked and colored based on the NES and sized by the  $-\log_{10}$  transformed value of the adjusted p-value. Colors signify the directionality and strength of enrichment, red=up and purple=down. GSEA=gene set enrichment analysis. NES=normalized enrichment score. TGF=transcription factor. EMT=epithelial mesenchymal transition. IFN=interferon.

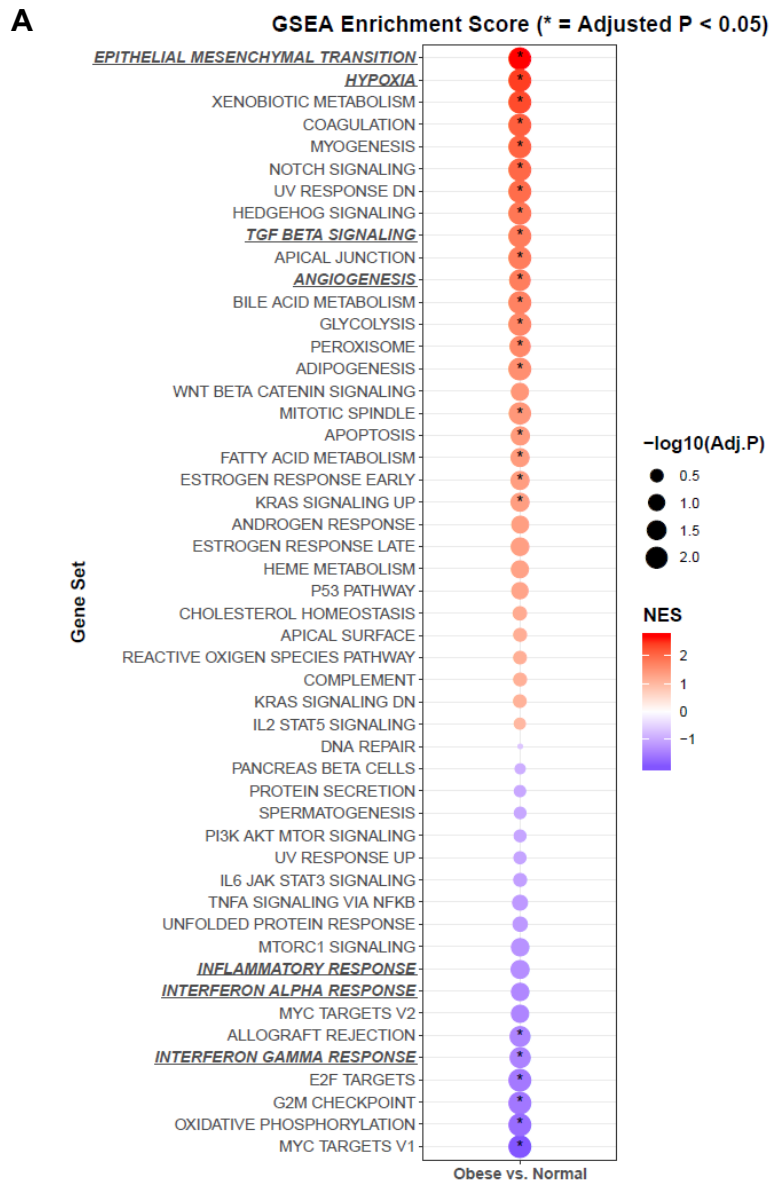

**B**

**Hypoxia**

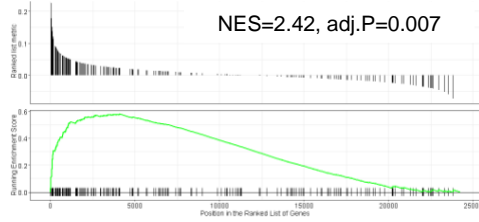

**EMT**

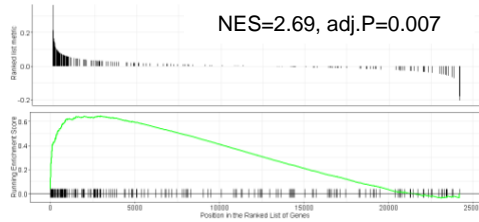

**Angiogenesis**

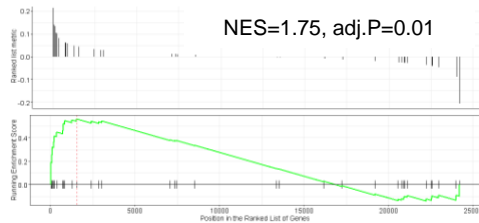

**TGF-beta signaling**

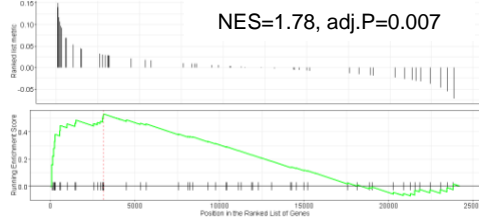

**IFN-gamma response**

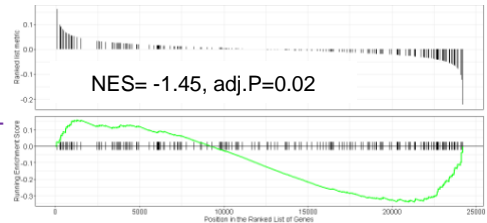

**IFN-alpha response**

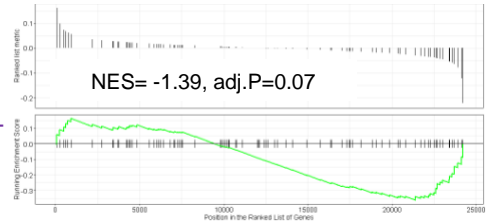

**Inflammatory response**

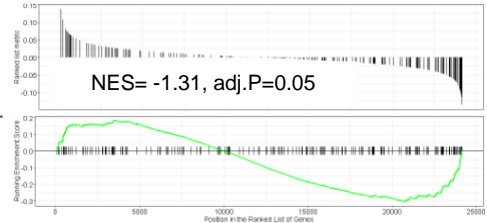

**Supplementary Figure 4 (D): Obese patients in the COMPARZ cohort harbor minimal differences in the tumor immune microenvironment compared to normal weight patients**

(D) Demonstrates ssGSEA immune deconvolution utilized to test the differences in specific immune cell populations and immune check-point molecules between obese and normal weight patients in the COMPARZ cohort. mean\_Z\_diff=mean z-score difference. Colors signify the directionality of infiltration changes, red=up and purple=down. The size of the circle corresponds to the negative value of log<sub>10</sub>(P). P=Wilcoxon–Mann–Whitney test p value. Immune deconvolution terms are defined in supplementary table 2.

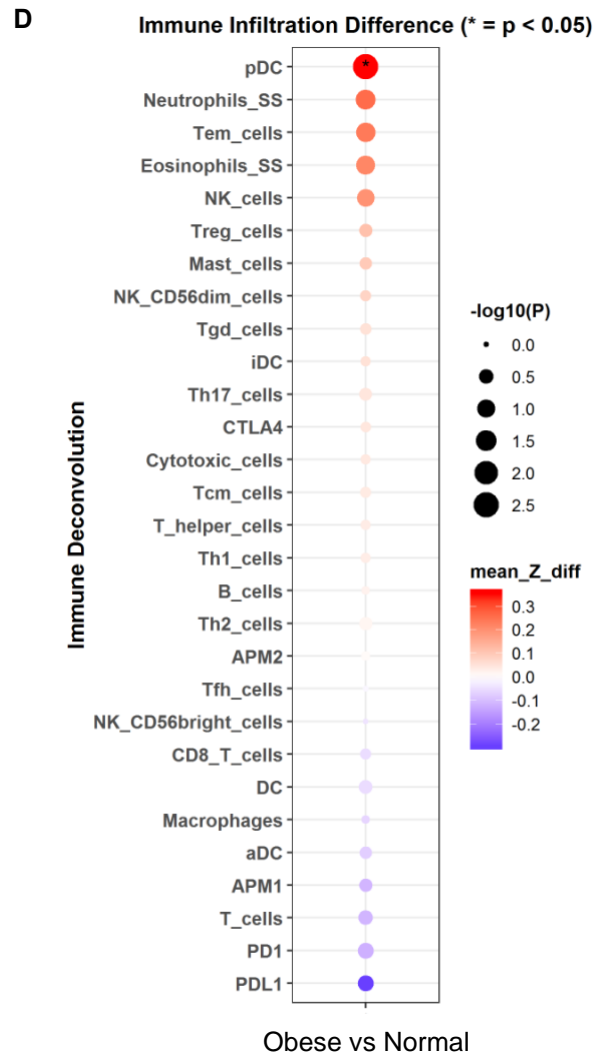

**Supplementary Figure 4 (E-G): Obese patients in the COMPARZ cohort harbor minimal differences in the tumor immune microenvironment compared to normal weight patients**

Box plots demonstrating insignificant differences in (E) cytolytic score, (F) T-effector score, and significant differences in (G) immune checkpoint score between obese (n=128) and normal weight (n=128) patients in the COMPARZ cohort. Z=z-score. Wilcoxon=Wilcoxon–Mann–Whitney test. Z=z-score.

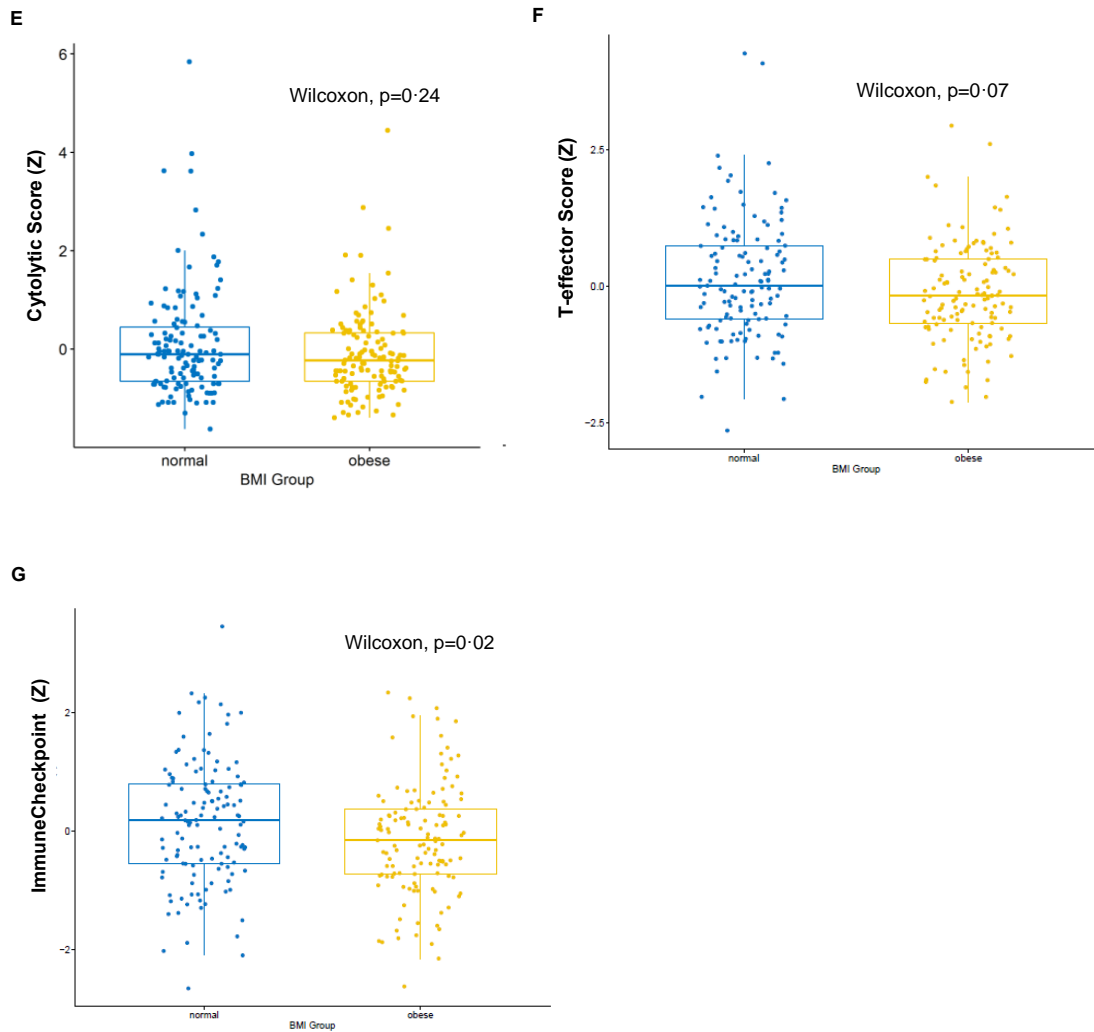



**Supplementary Figure 4 (H): Obese patients in the COMPARZ cohort harbor minimal differences in the tumor immune microenvironment compared to normal weight patients**

(H) Demonstrates differences in tumoral PD-L1 expression by immunohistochemistry staining between obese (n=128) and normal weight (n=130) patients in the COMPARZ cohort

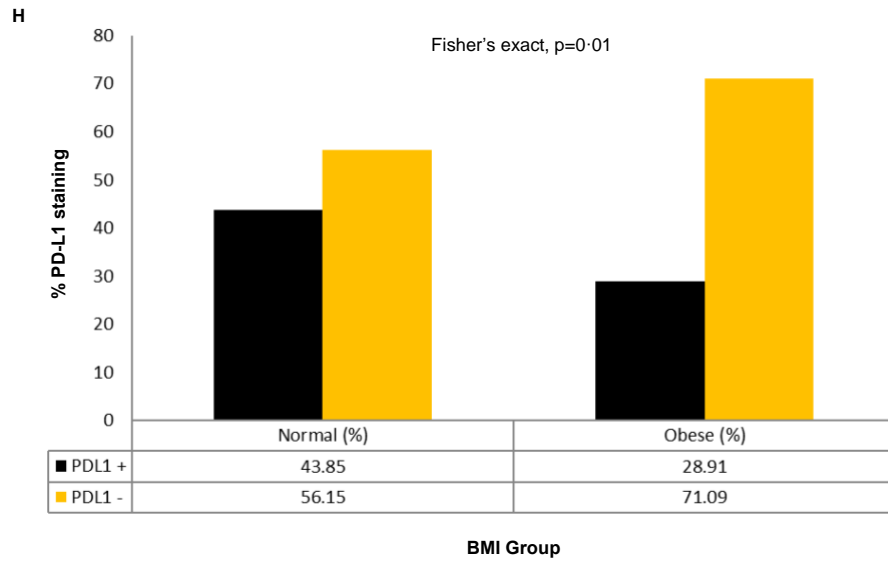

**Supplementary Figure 5 (A-B): Perinephric fat of obese patients demonstrates increased inflammation and hypoxia compared to normal weight patients**

In the MSK prospective cohort of non-metastatic ccRCC patients we performed (A) merged 20 most significantly enriched IPA Canonical Pathways from each comparison between obese and normal weight in perinephric fat and tumor. Positive and negative z-score indicate activated and inactivated signaling of the pathway respectively. (B) immune infiltration (ssGSEA score) comparisons between PNN and PNA samples in obese and normal weight as well as between obese and normal weight in perinephric fat samples. PNA=perinephric fat away. PNN=perinephric fat near. IPA=Ingenuity Pathway Analysis. zScore=IPA predicted pathway activation score. Mean Z diff=mean z score difference. P=nominal p value. The size of the circle corresponds to the negative value of log<sub>10</sub>(P). Colors signify the directionality and strength of enrichment, red=up and purple=down. CYT=cytolytic score. Immune deconvolution terms are defined in supplementary table 2.

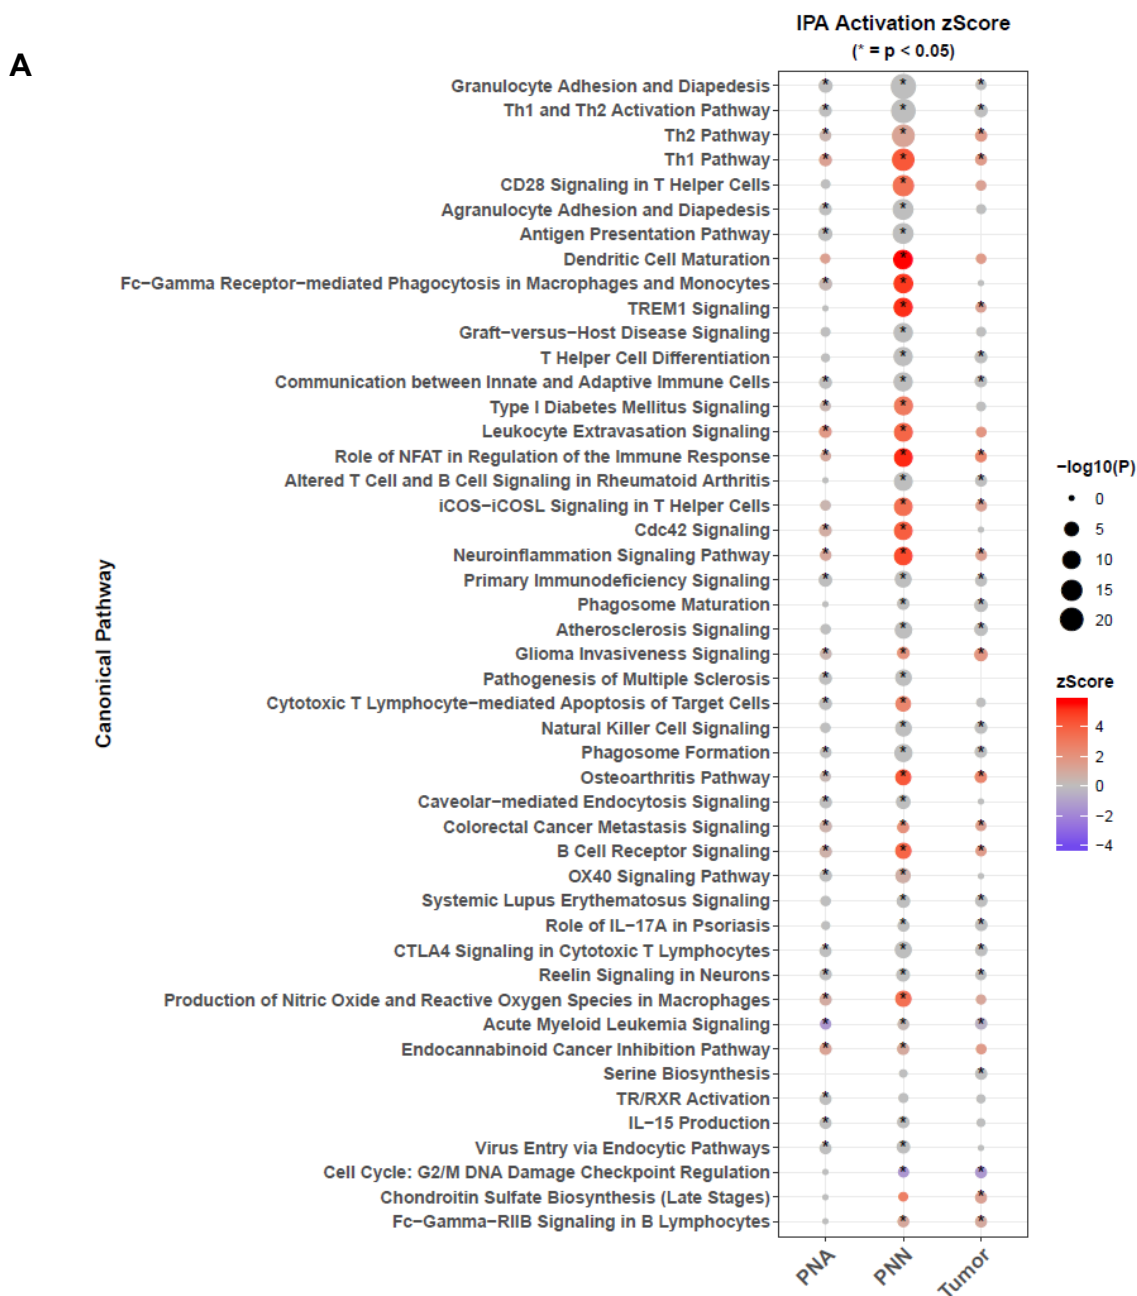

B

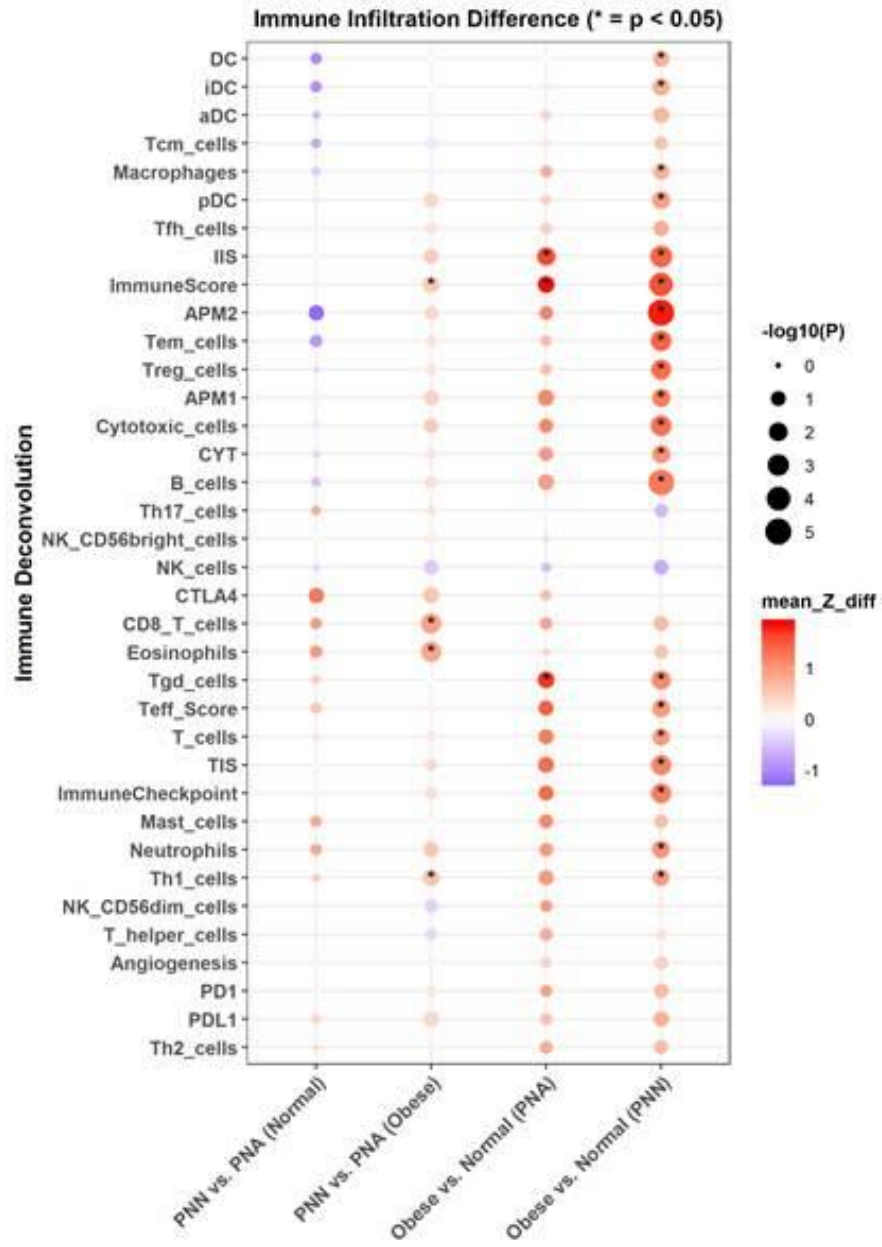

**Supplementary Figure 5 (C-G): Perinephric fat of obese patients demonstrates increased inflammation and hypoxia compared to normal weight patients**

In the MSK prospective cohort of non-metastatic ccRCC patients, (C) Volcano plot demonstrating gene expression differences between obese and normal weight patients in tumor and perinephric fat. (D) Spearman correlation between the deconvolved hypoxia score and immune feature scores. Box plots demonstrating differences in (E) hypoxia, (F) IIS, and (G) M1 scores between obese and normal weight in PNA, PNN, and tumor. PNA=perinephric fat away. PNN=perinephric fat near. T=tumor. IIS=immune infiltration score. APM1=antigen presenting machinery 1. APM2=antigen presenting machinery 2. M1 score=type 1 macrophage. M2 score=type 2 macrophage. Z=z-score.

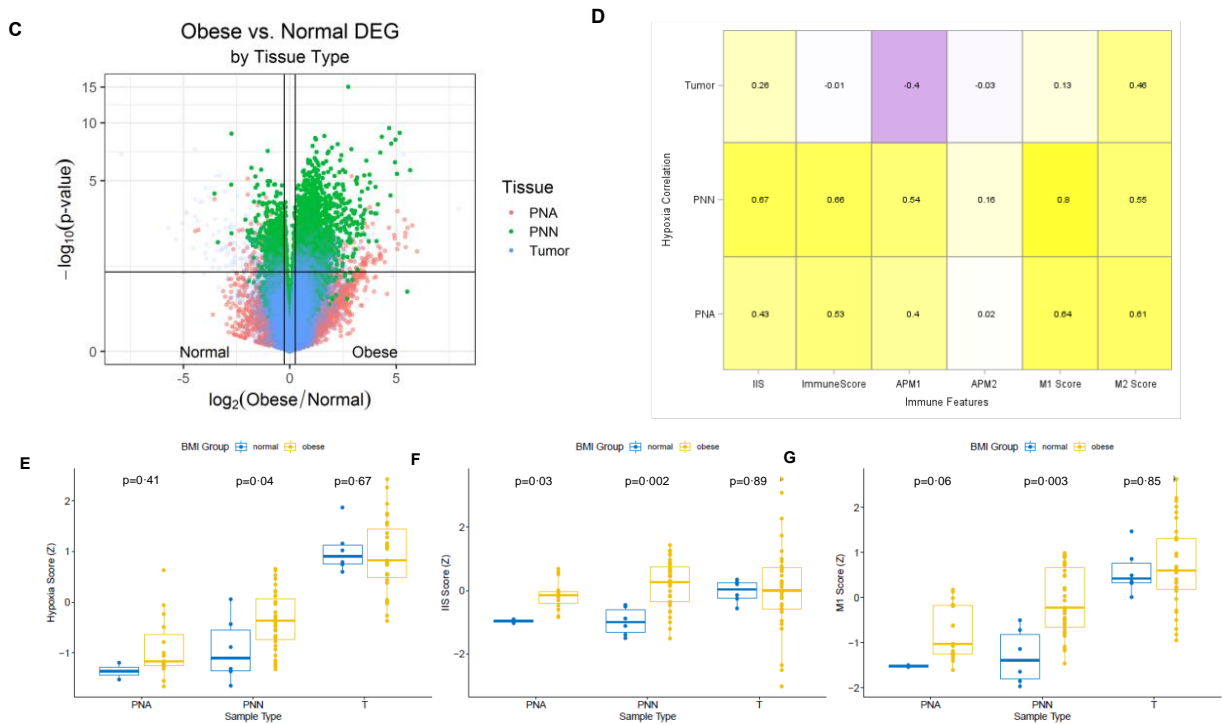

**Supplementary Figure 5 (H): Summary of findings in the tumor and peritumoral fat of obese compared to normal weight patients**

In the MSK prospective cohort of non-metastatic ccRCC patients, (H) Summary of gene expression findings.

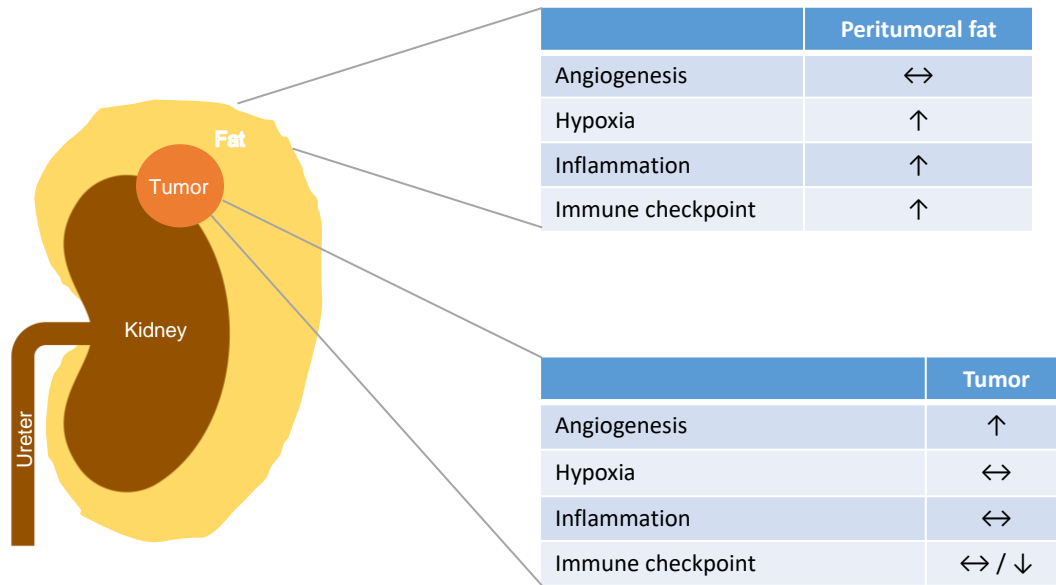

**Supplementary figure 6(A-B): Obese patients have higher tumor angiogenesis scores compared to normal weight patients (p=0.006)**

(A) Angiogenesis gene signatures and corresponding genes within each signature (B) Box plot suggesting differences in tumor angiogenesis scores between obese (n=128) vs normal weight (n=128) patients in the COMPARZ clinical cohort using the McDermott, et al. (Nat Med, 2018) angiogenesis signature.

**A**

| Signature                                       | Genes                                                                                                                                                                                                                                                                                                |
|-------------------------------------------------|------------------------------------------------------------------------------------------------------------------------------------------------------------------------------------------------------------------------------------------------------------------------------------------------------|
| <b>MSigDB Angiogenesis signature</b>            | <i>APOH, APP, CCND2, COL3A1, COL5A2, CXCL6, FGFR1, FSTL1, ITGAV, JAG1, JAG2, KCNJ8, LPL, LRPAP1, LUM, MSX1, NRP1, OLR1, PDGFA, PF4, PGLYRP1, POSTN, PRG2, PTK2, S100A4, SERPINA5, SLC02A1, SPP1, STC1, THBD, TIMP1, TNFRSF21, VAV2, VCAN, VEGFA, VTN</i>                                             |
| <b>Masiero et. al angiogenesis signature</b>    | <i>A2M, ACVRL1, APLNR, CDH5, COL15A1, EDNRB, EBF1, S1PR1, ENG, GNG11, LRRC32, ITGA9, KDR, PECAM1, PTPRB, ZNF423, CNRIP1, ADGRA2, TEK, LDB2, TIE1, CLEC3B, SPARCL1, RGS5, CALCRL, VWF, JAM2, PLVAP, ADGRL4, MYCT1, PDGFD, EMCN, RHOJ, ROBO4, ADGRF5, GIMAP8, CLEC14A, TM4SF18, ADCY4, ESAM, ECSCR</i> |
| <b>McDermott, et al. angiogenesis signature</b> | <i>VEGFA, KDR, ESM1, PECAM1, ANGPTL4, CD34</i>                                                                                                                                                                                                                                                       |

**B**

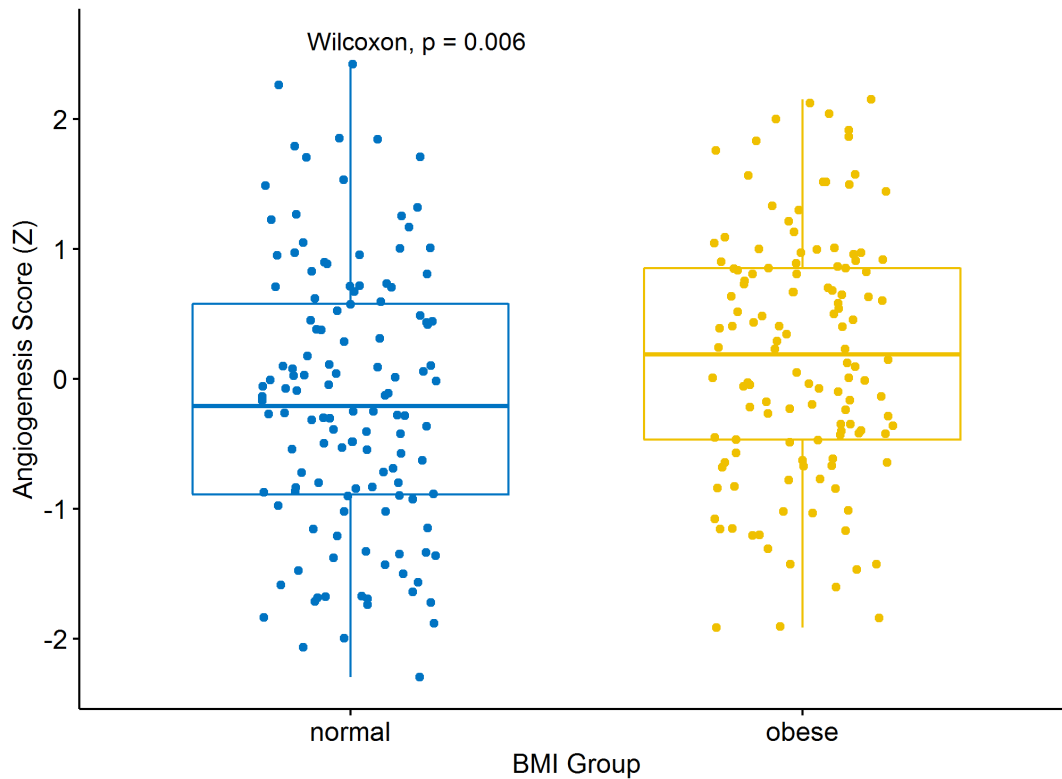

**Supplementary figure 7: Tumor immune deconvolution in TCGA AJCC stage III/IV cohort**

TCGA=The Cancer Genome Atlas clear cell kidney cancer. Mean\_Z\_diff=mean z-score difference. P=Wilcoxon–Mann–Whitney test p value. IIS=immune infiltration score. TIS=T-cell infiltration score. Immune deconvolution terms are defined in supplementary table 2. The size of the circle corresponds to the negative value of log<sub>10</sub>(P). Colors signify the directionality of immune infiltration differences of obese compared to normal weight where red=up and purple=down.

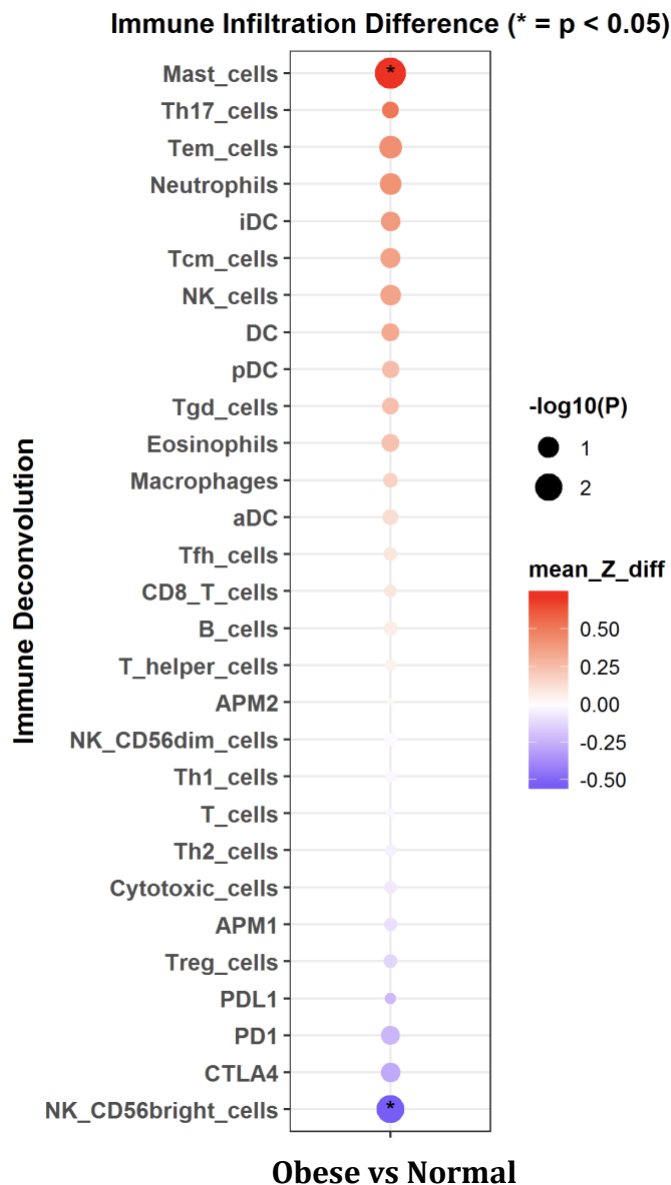

**Supplementary figure 8 (A-B): There are no differences in tumor mutational burden or in common gene mutations by BMI in the COMPARZ clinical trial**

(A) Box plot suggests no significant differences by BMI in tumor mutational burden ( $p=0.64$ ). (B) Similarly, there were no significant differences in commonly mutated ccRCC genes PBRM1, BAP1 and TP53 by BMI category (all  $p$ -values  $>0.05$ ).  $P$ -values derived using the Fisher's exact test. BMI=body mass index.

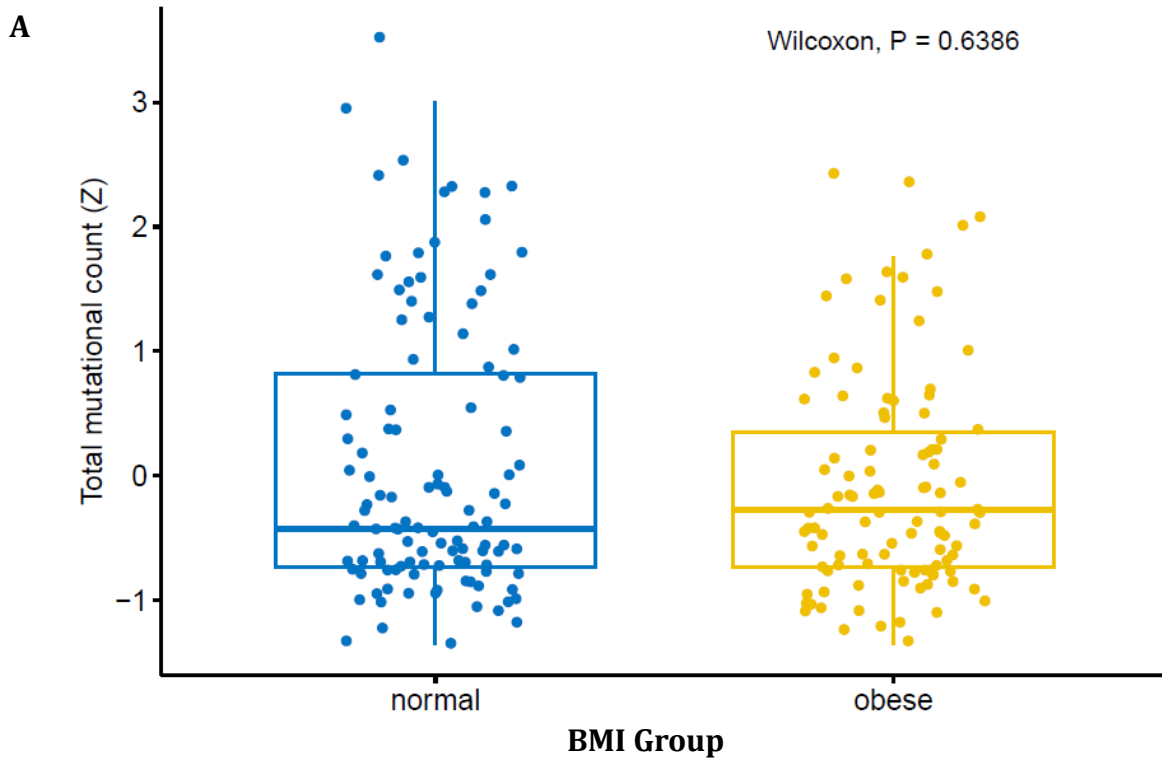

**B**

| Gene                 | Mutation Status | Normal Weight (n=120) | Obese (n=114) | P-value |
|----------------------|-----------------|-----------------------|---------------|---------|
| <i>PBRM1</i> , n (%) | Mutated         | 49 (40.8)             | 57 (50.0)     | 0.19    |
|                      | Wild type       | 71 (59.2)             | 57 (50.0)     |         |
| <i>BAP1</i> , n (%)  | Mutated         | 14 (11.7)             | 17 (14.9)     | 0.56    |
|                      | Wild type       | 106 (88.3)            | 97 (85.1)     |         |
| <i>TP53</i> , n (%)  | Mutated         | 15 (12.5)             | 11 (9.6)      | 0.54    |
|                      | Wild type       | 105 (87.5)            | 103 (90.4)    |         |



**Supplementary figure 9 (A-F): No significant differences in immune cell populations in normal weight vs obese patient tumors analyzed by flow cytometry.**

Major immune populations within primary tumors from a cohort of normal weight (n=7) and obese (n=16) patients were evaluated by flow cytometry. (A) Shows overall differences in indicated immune populations between obese versus normal patients where the size of the circle corresponds to the negative value of  $\log_{10}(P)$ . Colors signify the directionality of immune infiltration differences of obese compared to normal weight where red=up and purple=down. (B) specifically shows infiltration levels of T cell populations in obese and normal weight patients. All cell populations are expressed as a percentage of CD45+ cells and further defined as follows: B-cells (CD19+), CD3 (T-cells; SSC<sub>lo</sub>, CD3+), CD8 (CD8 T cells; SSC<sub>lo</sub>, CD3+, CD8+), PD1P\_CD8 (PD-1+ CD8 T cells), CD4 (CD4 T cells; SSC<sub>lo</sub>, CD3+ CD4+ FoxP3-), Treg (Regulatory T cells; CD4 T cells; SSC<sub>lo</sub>, CD3+ CD4+ FoxP3+), neutrophils (CD3-CD19-CD15+, SSC<sub>hi</sub>), monocytes/macrophages (CD3-CD19-HLA-DR+ cells that are CD14+CD16-, CD14+CD16+ or CD14-CD16+; designated CD14P\_CD16N, CD14P\_CD16P or CD14N\_CD16P respectively), conventional dendritic cell subsets 1 or 2 (CD3-CD19-CD14-CD16-HLA-DR+ cells that are CD141+ or CD1a+ respectively).

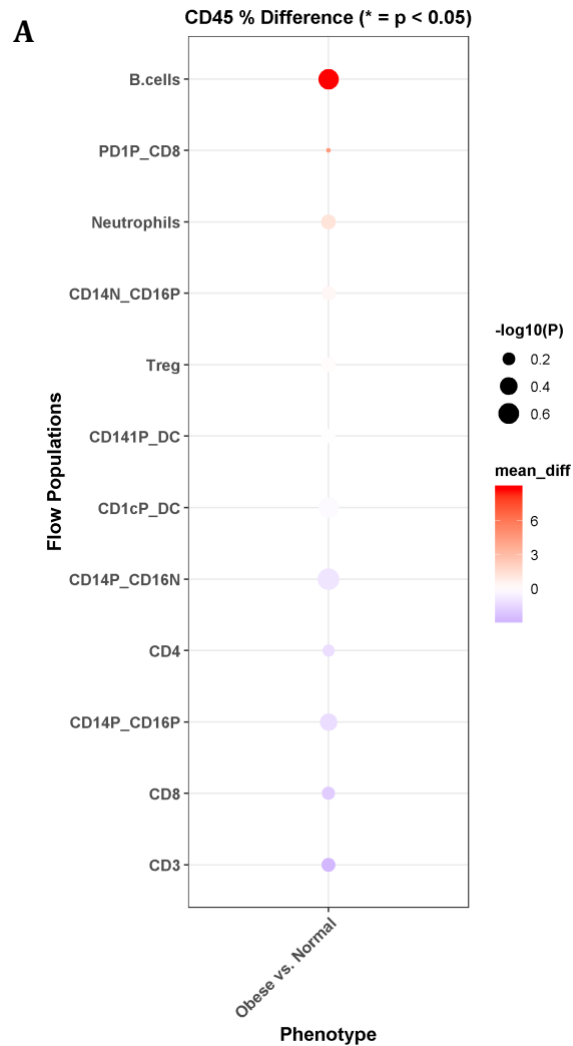

**B**

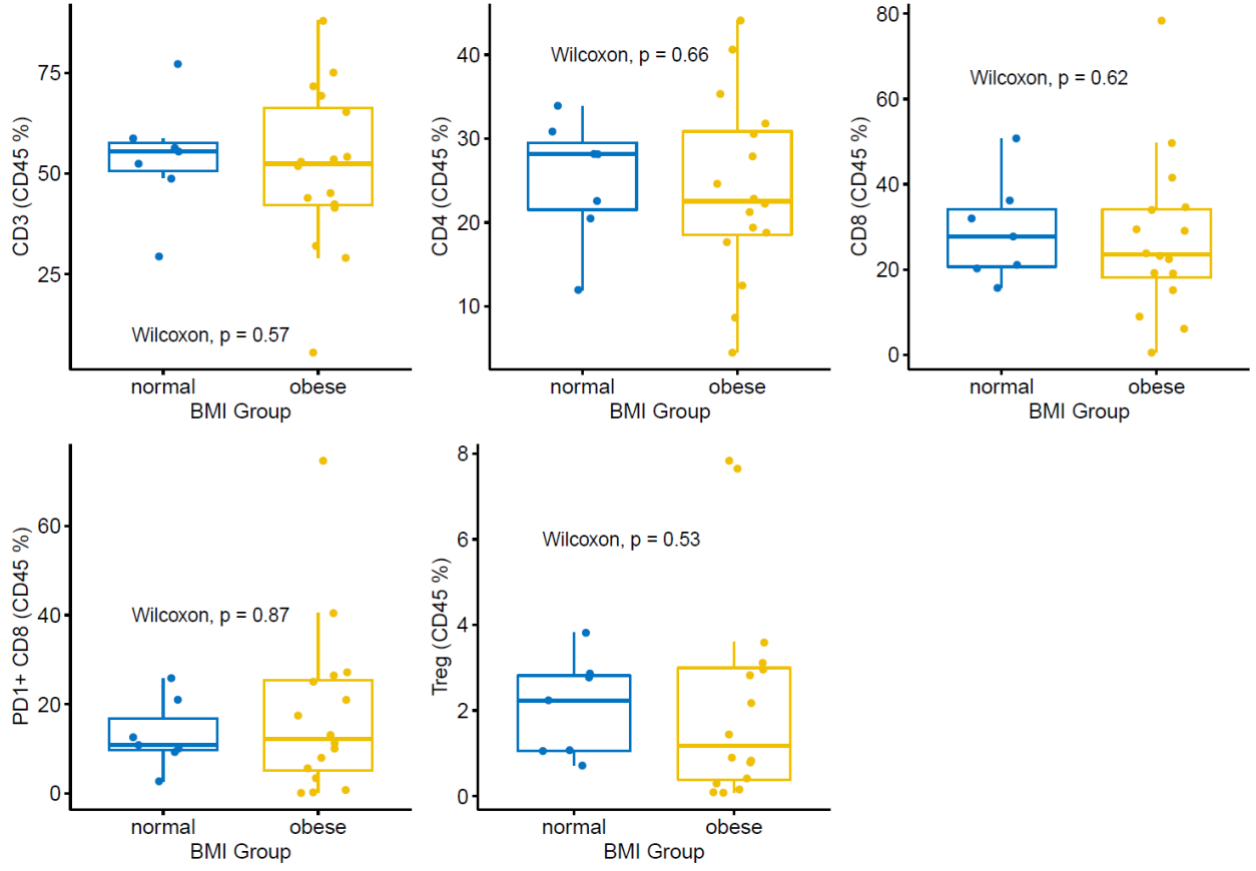

**Supplementary table 1: Clinicopathologic characteristics of prospective perinephric fat study**

|                     | <b>N=62</b> |
|---------------------|-------------|
| Age, median (SD)    | 58.9 (17.1) |
| Male, n (%)         | 48 (77.4)   |
| BMI, median (SD)    | 31.3 (7.5)  |
| BMI category, n (%) |             |
| Normal              | 6 (9.7)     |
| Overweight          | 20 (32.2)   |
| Obese               | 36 (58.1)   |
| AJCC Stage, n (%)   |             |
| I                   | 38 (61.3)   |
| II                  | 1 (1.6)     |
| III                 | 23 (37.1)   |

BMI=body mass index. SD=standard deviation.

**Supplementary table 2: Immune deconvolution legend.**

|                      |                                   |
|----------------------|-----------------------------------|
| Th17                 | Th17 helper T cells               |
| NK_cells             | Natural killer cells              |
| Teff_score           | T effector score                  |
| Th1                  | Th1 helper T cells                |
| T_helper_cells       | All T-helper cells                |
| CYT                  | Cytolytic score                   |
| IIS                  | Immune infiltration score         |
| TIS                  | T-cell infiltration score         |
| APM1                 | Antigen presenting machinery 1    |
| APM2                 | Antigen presenting machinery 2    |
| Tem                  | T effector memory                 |
| Tcm                  | T central memory                  |
| iDC                  | Immature dendritic cells          |
| aDC                  | Activated dendritic cell          |
| NK_CD56_bright_cells | Innate lymphoid cells             |
| Tfh                  | T follicular helper cells         |
| pDC                  | plasmacytoid dendritic cells      |
| NK_CD56_dim_cells    | Conventional natural killer cells |
| Tgd                  | T gamma-delta cells               |

**Supplementary table 3. Assessment of body mass index as a continuous variable and impact on overall survival across cohorts**

| <b>Cohort</b> | <b>Hazard Ratio</b> | <b>95% Confidence Intervals</b> |      |
|---------------|---------------------|---------------------------------|------|
| COMPARZ       | 0.97                | 0.95                            | 1.00 |
| TCGA          | 0.92                | 0.88                            | 0.97 |
| MSK IO        | 0.94                | 0.90                            | 0.98 |

**Supplementary table 4. Assessment of the association of BMI with overall survival in the MSK IO cohort after adjustment for IMDC risk criteria and sex. BMI reference=normal. IMDC reference=good. Sex reference=male.**

**Analysis of Maximum Likelihood Estimates**

| <b>Parameter</b>             | <b>DF</b> | <b>Parameter Estimate</b> | <b>Standard Error</b> | <b>Chi-Square</b> | <b>Pr &gt; ChiSq</b> | <b>Hazard Ratio</b> | <b>95% Hazard Ratio Confidence Limits</b> |       | <b>Label</b>       |
|------------------------------|-----------|---------------------------|-----------------------|-------------------|----------------------|---------------------|-------------------------------------------|-------|--------------------|
| <b>BMI_Categorical Obese</b> | 1         | -0.50598                  | 0.29897               | 2.8644            | 0.0906               | 0.603               | 0.336                                     | 1.083 | BMI Category Obese |
| <b>IMDC_Risk 2</b>           | 2         | 0.41722                   | 0.42582               | 0.9600            | 0.3272               | 1.518               | 0.659                                     | 3.497 | IMDC_Risk 2        |
| <b>IMDC_Risk 3</b>           | 3         | 1.06000                   | 0.49599               | 4.5674            | 0.0326               | 2.886               | 1.092                                     | 7.630 | IMDC_Risk 3        |
| <b>Sex</b>                   | 1         | -0.28566                  | 0.30062               | 0.9029            | 0.3420               | 0.752               | 0.417                                     | 1.355 | Sex                |

Supplementary table 5. Raw data for COMPARZ GSEA analysis (appendix p 9-10).

| Description                                       | Set Size | Enrichment Ecore | NES   | p-value | p-adjust | Core Enrichment                                                                                                                                                                                                                                                                                                                                                                                                                                                                                                                |
|---------------------------------------------------|----------|------------------|-------|---------|----------|--------------------------------------------------------------------------------------------------------------------------------------------------------------------------------------------------------------------------------------------------------------------------------------------------------------------------------------------------------------------------------------------------------------------------------------------------------------------------------------------------------------------------------|
| <b>HALLMARK_EPITHELIAL_MESENCHYMAL_TRANSITION</b> | 197      | 0.644            | 2.686 | 0.002   | 0.007    | THY1/TAGLN/SPARC/COL4A1/BGN/COL1A2/COL4A2/MGP/COL3A1/ACTA2/VEGFA/COL1A1/FN1/TIMP3/RHOB/LRP1/PDGFRB/ANPEP/MYL9/TGFB1/CTGF/COL6A3/PM EPA1/CDH6/HTRA1/COL6A2/GJA1/TGFB1/VIM/CXCL12/SLIT3/CALD1/COL5A2/LGALS1/FLNA/FBLN5/COL5A1/ABI3BP/ITGB5/TPM2/NID2/MMP2/ITGA5/ITGB1/DKK1/FMOD/SNAI2/FSTL1/IGFBP4/VCAM1/TIMP1/TPM1/SGCB/NNMT/SDC1/CDH2/QSOX1/TGFBR3/ECM1/BMP1/PCOLCE2/SNTB1/COL5A3/IGFBP3/THBS1/CDH11/LAMC1/NT5E/EDIL3/FBN1/PLOD1/DPYSL3/ELN/GE M/ITGAV/CTHRC1/DST/COL16A1/SPOCK1/CYR61/DAB2/EFEMP2/LAMA2/SERPINH1/SERPINE1/JUN |
| <b>HALLMARK_GLYCOLYSIS</b>                        | 198      | 0.394            | 1.645 | 0.002   | 0.007    | ANGPTL4/PHKA2/VEGFA/AK4/TGFB1/LDHA/CYB5A/EGLN3/DDIT4/COL5A1/CXCR4/ALDOB/P4HA1/STC1/MX11/MPI/SDC1/PFKP/ANG/QSOX1/SLC37A4/SOD1/GYS2/IGFBP3/IRS2/CACNA1H/ENO1/PYGL/PPFIA4/G6PD/NT5E/MIF/PLOD1/PAM/HDLBP/AGR/PC/GYS1/PDK3/RPE/ALDH9A1/GOT1/SDC2/CITED2/GPR87/GNE/TPBG/FAM162A/GLRX/ANKZF1/CHST1/SAP30/ABCB6/PGK1/NOL3/ALDH7A1/TFF3                                                                                                                                                                                                 |
| <b>HALLMARK_XENOBiotic_METABOLISM</b>             | 198      | 0.554            | 2.308 | 0.002   | 0.007    | PDK4/CRP/ENPEP/CES1/HRG/ABCC2/CYB5A/CYP2J2/ABCC3/CAT/UPB1/AQP9/FABP1/CYP2E1/EPHX1/SERPINA6/HNF4A/MBL2/SHMT2/CNDP2/NDRG2/PINK1/AKR1C3/TAT/FMO3/HMOX1/CYP4F2/AOX1/IGFBP4/ENTPD5/ITIH1/CFB/ARG1/ITIH4/AKR1C2/VTN/RBP4/TMBIM6/ECH1/XDH/SLC35D1/ATOH8/GCKR/PMM1/CYP1A2/ADH1C/DHPS/LEAP2/SLC22A1/PLG/BLVRB/PTGR1/ARG2/FETUB/TTPA/JUP/ACO2/HSD17B2/LCAT/PC/HSD11B1/ANGPTL3/REG1A/ACOX2/PDLIM5/ACOX1/ADH5/PTGDS/ETFDH/SERPINE1/ALDH9A1/TDO2/ETS2/F10/ID2/ACP1                                                                          |
| <b>HALLMARK_APICAL_JUNCTION</b>                   | 196      | 0.424            | 1.768 | 0.002   | 0.007    | THY1/VWF/PECAM1/MYH9/MYL9/TGFB1/CD34/CDH6/CD99/ACTN1/MSN/NFASC/CX3CL1/ACTN4/MMP2/ITGB1/VCAM1/ICAM2/IKBK/SHC1/ITGA9/JAM3/MMP9/PCDH1/CLDN18/BMP1/TSPAN4/CALB2/CDH1/CDH11/VCL/CTNND1                                                                                                                                                                                                                                                                                                                                              |
| <b>HALLMARK_HYPOXIA</b>                           | 196      | 0.580            | 2.417 | 0.002   | 0.007    | BGN/ANGPTL4/PGF/VEGFA/MYH9/PLIN2/ALDOC/ERRF1/AK4/TGFB1/CTGF/EFNA1/NDRG1/PCK1/LDHA/CCNG2/FOXO3/DDIT4/CA12/PTRF/PFKL/COL5A1/FOS/CXCR4/ALDOB/CDKN1B/NEDD4L/SLC2A5/P4HA1/HMOX1/STC1/MX11/PKLR/ZFP36/RORA/PFKP/ETS1/EDN2/GPI/SLC37A4/TMEM45A/KLF7/SCARB1/TIPARP/IGFBP3/IRS2/DUSP1/PDK1/ENO1/TGFB3/PPFIA4/MIF/BNIP3L/SELENBP1/PAM/HDLBP/KLF6/ADM/BRS3/PPP1R3C/BTG1/BCL2/CP/GYS1/PDK3/CYR61/SERPINE1/JUN/PDGFB/PHKG1/SDC2/CITED2/SIAH2/LALBA/PFKFB3/TPBG/FAM162A/KDM3A/GLRX/ANKZF1/GRHPR/WSB1/SAP30/AKAP12/PGK1                       |

|                                           |     |        |        |       |       |                                                                                                                                                                                                                                                                                                                                                                                                                                                                                                                                                                                        |
|-------------------------------------------|-----|--------|--------|-------|-------|----------------------------------------------------------------------------------------------------------------------------------------------------------------------------------------------------------------------------------------------------------------------------------------------------------------------------------------------------------------------------------------------------------------------------------------------------------------------------------------------------------------------------------------------------------------------------------------|
| <b>HALLMARK_MYOG<br/>ENESIS</b>           | 199 | 0.498  | 2.071  | 0.002 | 0.007 | TAGLN/SPARC/COL4A2/COL3A1/MYH11/<br>COL1A1/MYH9/IGFBP7/COL6A3/ERBB3/A<br>PP/COL6A2/TGFB1/FXYD1/RIT1/AEBP1/C<br>LU/ITGB5/TPM2/CDH13/ITGB1/DES/DMD/<br>APLNR/SORBS1/PLXNB2/ABLIM1/FHL1/M<br>EF2D/NOTCH1/FDPS/IGFBP3/GJA5/CAC<br>NA1H/COX6A2/HRC/PPFIA4/MB/SVIL/SM<br>TN/COL15A1/AGRN/PC/PPP1R3C                                                                                                                                                                                                                                                                                          |
| <b>HALLMARK_ADIPO<br/>GENESIS</b>         | 193 | 0.370  | 1.536  | 0.002 | 0.007 | SPARCL1/COL4A1/ANGPTL4/ENPP2/OR<br>M1/PLIN2/ACAA2/LAMA4/CAT/CCNG2/AC<br>LY/PTRF/PFKL/ITSN1/ADCY6/CMBL/MGL<br>L/SORBS1/CD151/FZD4/BCL6/SCARB1/S<br>TOM/SOD1/PHLDB1/ECH1/ACADM/BCKD<br>HA/DHCR7/MGST3/ACADL/COL15A1/AC<br>O2/BAZ2A/LIFR/ETFB/ECHS1                                                                                                                                                                                                                                                                                                                                       |
| <b>HALLMARK_TGF_B<br/>ETA_SIGNALING</b>   | 54  | 0.531  | 1.775  | 0.002 | 0.007 | SPTBN1/ENG/PMEP1/ID3/LTBP2/TGFB1<br>/PPM1A/SMAD6/ID1/CDH1/THBS1/CTNNA<br>1/SKI/SERPINE1/SMAD7/JUNB/FURIN/ID2                                                                                                                                                                                                                                                                                                                                                                                                                                                                           |
| <b>HALLMARK_BILE_A<br/>CID_METABOLISM</b> | 112 | 0.446  | 1.700  | 0.002 | 0.007 | GC/CAT/AQP9/TTR/SERPINA6/RBP1/AR/<br>SLC27A2/APOA1/SLC23A2/ABCA2/SOD1/<br>ALDH8A1/NR1H4/NR1I2/ALDH1A1/FADS2<br>/CYP7B1/DIO1/EFHC1/AGXT/ALDH9A1/P<br>EX6/HAO1/PECR/RXRA/DHCR24/ABCG8/<br>SCP2/GNMT/CYP39A1                                                                                                                                                                                                                                                                                                                                                                              |
| <b>HALLMARK_HEDGE<br/>HOG_SIGNALING</b>   | 35  | 0.595  | 1.844  | 0.002 | 0.007 | THY1/VEGFA/MYH9/NRP1/DPYSL2/LDB1/<br>PTCH1/PLG                                                                                                                                                                                                                                                                                                                                                                                                                                                                                                                                         |
| <b>HALLMARK_COAG<br/>ULATION</b>          | 136 | 0.539  | 2.108  | 0.002 | 0.007 | SPARC/VWF/A2M/PECAM1/FN1/TIMP3/L<br>RP1/TF/HRG/SERPINC1/HTRA1/CPB2/SE<br>RPING1/C9/HNF4A/MBL2/CLU/FGA/C8B/<br>HMGS2/F9/MMP2/HPN/RGN/TIMP1/ITIH<br>1/CRIP2/CFI/CFB/ANG/APOA1/PRSS23/K<br>LF7/MMP9/C8A/APOC3/BMP1/F13B/THBS<br>1/CSRP1/THBD/PLG/FBN1/SERPINA1/CT<br>SO/CASP9/P2RY1/MST1/F2/ACOX2/CFH/<br>PEF1/GSN/SERPINE1/CPN1/KLKB1/FURI<br>N/PDGFB/F10/SERPIN2/MMP8/MMP1                                                                                                                                                                                                              |
| <b>HALLMARK_UV_RE<br/>SPONSE_DN</b>       | 141 | 0.499  | 1.957  | 0.002 | 0.007 | COL1A2/COL3A1/COL1A1/PDGFRB/IGFB<br>P5/NRP1/ANXA4/GJA1/COL5A2/FBLN5/C<br>DKN1B/LTBP1/TFPI/SNAI2/NFIB/PTPRM/<br>GRK5/ATP2B4/TGFBR2/MGLL/ID1/TGFBR<br>3/SYNE1/APBB2/DUSP1/LAMC1/FZD2/CD<br>C42BPA/EFEMP1/CDON/PDLIM5/CYR61/<br>DAB2/SERPINE1/SMAD7/RXRA/SDC2/CIT<br>ED2/PIAS3/LDLR                                                                                                                                                                                                                                                                                                       |
| <b>HALLMARK_NOTCH<br/>_SIGNALING</b>      | 31  | 0.656  | 2.008  | 0.002 | 0.007 | NOTCH3/JAG1/CCND1/HEYL/NOTCH1/K<br>AT2A/TCF7L2/MAML2/ARRB1/DLL1/FZD5/<br>SAP30/FZD1/ST3GAL6/NOTCH2/PSEN2/L<br>FNG                                                                                                                                                                                                                                                                                                                                                                                                                                                                      |
| <b>HALLMARK_E2F_T<br/>ARGETS</b>          | 198 | -0.364 | -1.554 | 0.002 | 0.007 | PRPS1/RAD21/NME1/CDKN1A/MCM7/TRI<br>P13/RFC3/HMMR/CENPM/CDC20/RRM2/<br>PRIM2/MCM2/MKI67/RNASEH2A/KIF18B/<br>NUP107/DUT/CSE1L/SYNCRIP/TIMELES<br>S/NUP205/MLH1/TCF19/SPC25/ATAD2/C<br>HEK2/CDK1/CCNB2/RBBP7/MAD2L1/PCN<br>A/PAICS/RQCD1/SMC4/TMPO/NBN/DCK/<br>ANP32E/POLD2/USP1/TIPIN/MCM4/CDKN<br>2C/CHEK1/TBRG4/SMC6/NCAPD2/TUBG<br>1/DCLRE1B/POLD1/PA2G4/UBE2T/LMNB<br>1/PHF5A/GINS3/MTHFD2/RPA3/DEK/PMS<br>2/NUP153/CKS1B/TOP2A/PRKDC/SRSF2/<br>HUS1/GINS1/NAA38/PLK1/TUBB/UBE2S/<br>BIRC5/HN1/NUDT21/NAP1L1/H2AFX/SLB<br>P/CDK4/TK1/TFRC/IPO7/RAN/HMGA1/KP<br>NA2/GSPT1/CKS2/HMGB3 |

|                                           |     |        |        |       |       |                                                                                                                                                                                                                                                                                                                                                                                                                                                                                             |
|-------------------------------------------|-----|--------|--------|-------|-------|---------------------------------------------------------------------------------------------------------------------------------------------------------------------------------------------------------------------------------------------------------------------------------------------------------------------------------------------------------------------------------------------------------------------------------------------------------------------------------------------|
| <b>HALLMARK_G2M_CHECKPOINT</b>            | 198 | -0.370 | -1.581 | 0.002 | 0.007 | LMNB1/CDC45/KIF11/DKC1/H2AFV/BUB1/PTTG3P/CUL4A/CKS1B/EGF/TOP2A/HSPA8/DBF4/E2F3/SRSF2/PRC1/HUS1/PLK1/BCL3/CDC27/UBE2S/MT2A/BIRC5/EFNA5/KPNB1/HN1/UBE2C/TOP1/ODC1/G3BP1/H2AFX/KIF5B/CENPA/SLC7A1/CDK4/SLC38A1/HMGA1/KPNA2/GSPT1/HIF1A/CKS2/HMGB3/SLC7A5                                                                                                                                                                                                                                       |
| <b>HALLMARK_MYC_TARGETS_V1</b>            | 197 | -0.463 | -1.974 | 0.002 | 0.007 | SMARCC1/USP1/UBE2L3/RNPS1/VDAC3/PSMA2/MCM4/TUFM/UBE2E1/TYMS/SNRPD1/SSB/ERH/NPM1/PSMC6/PABPC4/PA2G4/EIF4E/HNRNPC/HDAC2/PHB/RPS10/CDC45/HSPD1/PHB2/PCBP1/HSP90AB1/SNRPA1/DEK/NCBP2/HNRNPA3/C1QBP/PSMB3/CCT3/PSMA1/SRSF2/PRDX3/YWHAQ/KARS/SRPK1/SLC25A3/IARS/EIF4A1/GOT2/PPM1G/POLE3/EXOSC7/CCT4/ILF2/PSMD14/PSMD1/KPNB1/SRM/RPL22/SNRPB2/XPOT/AIMP2/NAP1L1/NDUFAB1/ODC1/PSMA7/PSMD7/G3BP1/PPIA/PSMA4/PTGES3/EIF1AX/CDK4/ETF1/EIF2S2/CBX3/CCT2/RPS2/RPL14/DDX21/RAN/GLO1/KPNA2/GSPT1/COX5A/SET |
| <b>HALLMARK_OXIDATIVE_PHOSPHORYLATION</b> | 197 | -0.402 | -1.713 | 0.002 | 0.007 | NDUFS8/IMMT/ATP6V0B/ATP5D/NDUFA7/COX10/NDUFS3/MRPL35/NDUFA2/ATP6V1E1/SUPV3L1/SDHD/BAX/PDHA1/PRDX3/NDUFB5/NDUFA4/SLC25A3/IDH3A/AIFM1/OPA1/PDP1/PDHB/ATP5B/SDHC/NDUFA9/HCCS/ATP5L/ATP6V0E1/GOT2/UQCR2/LRPPRC/VDAC2/ATP5G1/UQCRFS1/ATP5C1/COX6A1/ATP5J2/ATP6V1C1/ATP6V1H/DLD/ATP6AP1/NDUFAB1/CS/ATP5E/SUCLG1/ATP5H/NDUFB1/ATP5I/NDUFA3/UQCR11/ATP6V1F/ATP6V1D/NDUFB3/NDUFA1/COX6C/NNT/ATP5G3/CYCS/COX7B/COX5A/ATP6V0C/LDHB/SLC25A5                                                             |
| <b>HALLMARK_MITOTIC_SPINDLE</b>           | 198 | 0.344  | 1.434  | 0.004 | 0.010 | MYH9/SPTBN1/SORBS2/EZR/SYNPO/FLNA/NET1/ITSN1/ACTN4/NUMA1/ARHGEF12/WASF2/EPB41/PLEKHG2/ARAP3/NEDD9/TUBGCP6/PCNT/NCK2/CAPZB/VCL/HDAC6/CDC42BPA/CENPE/PREX1/CDK5RAP2/KLC1/CTTN/TAOK2/CYTH2/MYO9B/DST/CLIP2/SUN2/PDLIM5/PKD2/MAP3K11/GSN                                                                                                                                                                                                                                                        |
| <b>HALLMARK_ANGIOGENESIS</b>              | 36  | 0.559  | 1.754  | 0.006 | 0.015 | COL3A1/VEGFA/JAG1/APOH/APP/NRP1/COL5A2/FSTL1/SLCO2A1/STC1/TIMP1/TN/THBD                                                                                                                                                                                                                                                                                                                                                                                                                     |
| <b>HALLMARK_INTERFERON_GAMMA_RESPONSE</b> | 196 | -0.340 | -1.445 | 0.007 | 0.017 | MTHFD2/IL18BP/CIITA/ICAM1/UBE2L6/PSMB9/PARP12/IL10RA/HLAB/PSMA3/SRI/IRF5/LAP3/PIM1/HLAA/MT2A/CXCL11/HLA-DMA/LGALS3BP/IFIH1/SECTM1/CD274/CD38/TNFAIP2/PLSCR1/PSME2/CXCL9/FCGR1A/SLAMF7/CD86/PTPN1/EIF2AK2/HLAG/CXCL10/SAMHD1/SOCS3/NAMPT/TAP1/RIPK2/UPP1/GZMA/WARS/CCL5/HIF1A/STAT1/IFI27/IFI30                                                                                                                                                                                              |
| <b>HALLMARK_PEROXISOME</b>                | 103 | 0.434  | 1.634  | 0.007 | 0.018 | ALB/CAT/DHRS3/TTR/SERPINA6/SLC27A2/EHHADH/SLC23A2/HAO2/SOD1/CELF/PS/ECH1/ECI2/NR1I2/ALDH1A1/HSD11B2/PEX5/CNBP/UGT2B17/MSH2/DIO1/ABCB4/ACOX1/ALDH9A1/PEX6/DHCR24/SCP2/FABP6/SOD2                                                                                                                                                                                                                                                                                                             |



|                                         |     |        |        |       |       |                                                                                                                                                                                                                                                                                                                                                   |
|-----------------------------------------|-----|--------|--------|-------|-------|---------------------------------------------------------------------------------------------------------------------------------------------------------------------------------------------------------------------------------------------------------------------------------------------------------------------------------------------------|
| <b>HALLMARK_ALLOG RAFT_REJECTION</b>    | 200 | -0.333 | -1.428 | 0.009 | 0.021 | IRF4/IL6/GBP2/AARS/EIF3A/CCND2/IL12RB1/NLRP3/LYN/IL12B/GALNT1/F2R/CXCR3/ICAM1/ELANE/CCL13/ACHE/EREG/HLA-DMB/PTPRC/CD8B/UBE2D1/FYB/IL2RG/CD3G/BCL3/CCR5/CD47/CD7/CAPG/HLA-A/CSF1/HLA-DMA/IL18/CXCL9/RARS/CTSS/FCGR2B/CD86/IL2RA/CD2/HLA-G/HLA-DOA/SRGN/TAP1/RIPK2/TAP2/CD8A/GZMA/WARS/CXCL13/GPR65/GCNT1/CCR1/CCL5/HIF1A/STAT1/CCL4                |
| <b>HALLMARK_APOPTOSIS</b>               | 159 | 0.349  | 1.401  | 0.021 | 0.045 | BGN/TXNIP/TIMP3/RHOB/PDGFRB/CCND1/ERBB3/APP/CLU/CDKN1B/MMP2/CASP8/TIMP2/HMOX1/TIMP1/BTG2/NEDD9/TGFBR3/SOD1/HGF/GSTM1/BNIP3L/MADD/CASP9/ADD1/F2/CTNNA1/CREBBP/GSN/JUN/SMAD7/PSEN1/TNF/RARA/SPTAN1/CFLAR/FEZ1/IFITM3/SOD2/TNFSF10                                                                                                                   |
| <b>HALLMARK_ESTROGEN_RESPONSE_EARLY</b> | 199 | 0.327  | 1.360  | 0.025 | 0.050 | CCND1/GJA1/INHBB/PDZK1/CXCL12/DHRS3/CA12/RAB17/MAST4/FOS/SLC7A2/AR/IGFBP4/MAPT/KRT19/SLC27A2/ABLIM1/PRSS23/AQP3/SCARB1/TIPARP/SLC1A1/KDM4B/SEC14L2/SLC9A3R1/PODXL/ME D13L/CALB2/DEPTOR/MYOF/SYBU/DHCR7/BLVRB/SVIL/BCL2/SYNGR1/ESRP2/SYT12/SIAH2/ZNF185/RARA/NPY1R/TPBG/KRT15/IL6ST/FKBP5/IL17RB/FLNB/GAB2/RHOBTB3/FRK/TFF3/NBL1/DLC1/ELOVL2/ANXA9 |
| <b>HALLMARK_KRAS_SIGNALING_UP</b>       | 193 | 0.326  | 1.351  | 0.025 | 0.050 | PLVAP/SPARCL1/ANGPTL4/PECAM1/ENGG/ANO1/NRP1/CFHR2/CXCR4/PPBP/TFPI/TRIB2/CFB/TOR1AIP2/FLT4/ETS1/ARG1/MMP9/RBP4/GPRC5B/IGFBP3/MAP7/SLP1/NR1H4/USH1C/GUCY1A3/IL33/JUP/HSD11B1/HIST1H2BB/BTBD3                                                                                                                                                        |
| <b>HALLMARK_FATTY_ACID_METABOLISM</b>   | 156 | 0.347  | 1.390  | 0.026 | 0.050 | CYP4A11/LDHA/ACAA2/ALDH3A2/AOC3/ACADVL/S100A10/CYP4A22/FABP1/LGALS1/EPHX1/HMGCS2/SERINC1/CPT1A/MGLL/EHHADH/HAO2/APEX1/GPD1/UROD/C EL/ECH1/ACADM/ECI2/ADH1C/MIF/CRYZ/CA6/ALDH1A1/ACADL/PPARA/ACO2/EC HS1/ACAT2/ACOX1/ETFDH/SDHA/ALDH9A1/TDO2/DHCR24                                                                                                |
| <b>HALLMARK_INFLAMMATORY_RESPONSE</b>   | 197 | -0.307 | -1.306 | 0.028 | 0.051 | NLRP3/MET/PTPRE/CD48/TNFSF9/LYN/IL12B/ICAM1/NPFFR2/PVR/RASGRP1/EBI3/EREG/IL10RA/SRI/SPHK1/AHR/CXCL6/CSF1/CXCL11/IL18/MEP1A/CSF3/ADORA2B/GPC3/CD14/CXCL9/C3AR1/RHOG/EIF2AK2/CXCL10/SLC7A1/C5AR1/PTGER4/NA MPT/RIPK2/CYBB/ITGB8/PLAUR/OPRK1/OLR1/MSR1/RGS1/CCL5/HIF1A/NOD2                                                                          |
| <b>HALLMARK_ESTROGEN_RESPONSE_LATE</b>  | 199 | 0.319  | 1.326  | 0.032 | 0.058 | CCND1/S100A9/ALDH3A2/PDZK1/CXCL12/CA12/FOS/CYP4F11/ASS1/HMGCS2/EM P2/IGFBP4/MAPT/KRT19/ATP2B4/SLC27A2/ZFP36/TPSAB1/CXCL14/PRSS23/SCARB1/SLC9A3R1/CDH1/UNC13B/MYOF/DHCR7/BLVRB/SERPINA1/SORD/DLG5/ETFB/SGK1/BCL2/ACOX2/IMPA2/SERPINA5/ID2/SIAH2/NPY1R/TPBG/IL6ST/FKBP5/CP E/CA2/IL17RB/FLNB/METTL3/PLAC1/FRK/TFF3/NBL1/CHST8/PRLR/ANXA9/TST        |

|                                            |     |        |        |       |       |                                                                                                                                                                                                                                                                                                                                                                      |
|--------------------------------------------|-----|--------|--------|-------|-------|----------------------------------------------------------------------------------------------------------------------------------------------------------------------------------------------------------------------------------------------------------------------------------------------------------------------------------------------------------------------|
| <b>HALLMARK_MTORC1_SIGNALING</b>           | 198 | -0.297 | -1.267 | 0.039 | 0.065 | HSPA9/TUBG1/PSMG1/PSMC6/SQLE/PSAT1/STIP1/GSK3B/ITGB2/GLA/HSPD1/MA2K3/NFIL3/RAB1A/ACACA/TCEA1/SLC1A5/ASNS/MTHFD2/IMMT/ELOVL5/BUB1/ABC2/RPN1/MLLT11/SEC11A/TES/TUBA4A/PSPH/VLDLR/ACSL3/PSMA3/PLK1/HSPA5/PSMD14/ATP5G1/PDAP1/CYB5B/PPA1/GMPS/GGA2/M6PR/PIIA/PSMA4/ACTR3/CCT6A/SKAP2/YKT6/BHLHE40/ETF1/EIF2S2/TFRC/PSMC2/NAMPT/ATP6V1D/HSPA4/WARS/LGMN/CTSC/SLC7A5/IFI30 |
| <b>HALLMARK_INTERFERON_ALPHA_RESPONSE</b>  | 93  | -0.362 | -1.386 | 0.039 | 0.065 | PSMB9/PARP12/PSMA3/LAP3/CD47/GMPR/CSF1/CXCL11/LGALS3BP/IFIH1/PLSCR1/PSME2/EIF2AK2/CXCL10/HLA-C/TAP1/RIPK2/WARS/IFI27/IFI30                                                                                                                                                                                                                                           |
| <b>HALLMARK_MYC_TARGETS_V2</b>             | 57  | -0.399 | -1.411 | 0.043 | 0.069 | NOC4L/MCM4/TBRG4/NPM1/PA2G4/PHB/HSPD1/PPRC1/SUPV3L1/PLK1/WDR43/SRM/AIMP2/DUSP2/NIP7/CDK4/CBX3                                                                                                                                                                                                                                                                        |
| <b>HALLMARK_HEME_METABOLISM</b>            | 196 | 0.309  | 1.288  | 0.048 | 0.075 | HBB/TNS1/CAT/FOXO3/ARHGEF12/EPB41/MX1/SIDT2/BTG2/HBD/FECH/AQP3/ALAS2/UROD/SEC14L1/EZH1/RBM5/CCDC28A/MGST3/BNIP3L/BLVRB/SELENBP1/HIST1H4C/KHNYN/HBBP1/PC/CROCCP2/ADD1/GYPE/SLC25A37/GLRX5/TNRC6B/RIOK3/TAL1/DCAF11/LMO2/NFE2L1/BSG/SLC10A3/ALDH1L1/CA2/FTCD/ADD2/ABCB6/RNF19A                                                                                         |
| <b>HALLMARK_WNT_BETA_CATENIN_SIGNALING</b> | 42  | 0.453  | 1.450  | 0.050 | 0.075 | JAG1/NOTCH4/DKK1/NOTCH1/PTCH1/KAT2A/TCF7/CSNK1E/CTNNB1/JAG2/HDAC5/DLL1/HEY1/MAML1/NUMB                                                                                                                                                                                                                                                                               |
| <b>HALLMARK_ANDROGEN_RESPONSE</b>          | 100 | 0.355  | 1.333  | 0.056 | 0.082 | CCND1/NDRG1/PMPEA1/ACTN1/AZGP1/HMGCR/SLC38A2/KRT19/LMAN1/SEPP1/ARID5B/MAP7/GUCY1A3/TSC22D1/SORD/LIFR/SGK1/ITGAV/PDLIM5/STEAP4/DHCR24/MAK/HERC3/KLK3/FKBP5/CAMKK2/AKAP12/PTPN21/B2M/IQGAP2/HMGCS1                                                                                                                                                                     |
| <b>HALLMARK_P53_PATHWAY</b>                | 198 | 0.302  | 1.259  | 0.072 | 0.103 | TXNIP/NDRG1/ZBTB16/APP/PITPNC1/TGFB1/INHBB/FOXO3/DDIT4/S100A10/EPHX1/FOS/SP1/RPL18/CDH13/HMOX1/PLXNB2/SDC1/BTG2/DDB2/GPX2/LRMP/STOM/FGF13/NOTCH1/HEXIM1/PHLDA3/SLC35D1/PMM1/TSC22D1/ERCC5/CCNK/BTG1/CD81/MXD4/TSPYL2/RAB40C/JAG2/JUN/PRMT2/CTSF/RXRA                                                                                                                 |
| <b>HALLMARK_TNFA_SIGNALING_VIA_NFKB</b>    | 198 | -0.275 | -1.175 | 0.124 | 0.172 | REL/PLEK/FOSL1/SLC2A6/ATF3/IL6/TUBB2A/MAP2K3/NFIL3/PTPRE/NR4A2/TNFSF9/BIRC3/IL12B/SLC16A6/BMP2/CLCF1/ICAM1/YRDC/BTG3/NINJ1/DUSP4/TRIB1/RELB/SPHK1/BCL3/NFE2L2/TNFAIP8/CXCL6/NFAT5/CSF1/CXCL11/IFIH1/IL18/NR4A3/DRAM1/TNFAIP2/DUSP5/ZC3H12A/B4GALT5/DUSP2/CXCL10/KLF10/SAT1/BHLHE40/LITAF/PLAU/SOCS3/PTGER4/NAMPT/TAP1/RIPK2/TNC/PLAUR/OLR1/CCL5/G0S2/PHLDA2/CCL4     |
| <b>HALLMARK_UNFOLDED_PROTEIN_RESPONSE</b>  | 110 | -0.299 | -1.179 | 0.148 | 0.200 | HSPA9/ATF6/NPM1/LSM1/PSAT1/ARFGAP1/EIF4E/KDEL3/ATF3/TUBB2A/EXOSC1/DKC1/ASNS/MTHFD2/HYOU1/CKS1B/DCP1A/SEC11A/DCP2/EIF4G1/SPCS1/IARS/EIF4A1/HSPA5/CHAC1/XPOT/H2AFX/PARN/GEMIN4/KIF5B/PAIP1/DNAJC3/ATP6V0D1/KHSRP/SLC7A5                                                                                                                                                |
| <b>HALLMARK_CHOLESTEROL_HOMEOSTASIS</b>    | 73  | 0.329  | 1.167  | 0.212 | 0.279 | ALDOC/JAG1/ERRFI1/CLU/HMGCR/ADH4/CYP51A1/ABCA2/FDPS/ECH1/LSS/DHCR7/PMVK/FADS2/ACAT2/CTNNB1/PDK3                                                                                                                                                                                                                                                                      |

|                                                 |     |        |        |       |       |                                                                                                                                                                                                                                      |
|-------------------------------------------------|-----|--------|--------|-------|-------|--------------------------------------------------------------------------------------------------------------------------------------------------------------------------------------------------------------------------------------|
| <b>HALLMARK_IL6_JAK_STAT3_SIGNALING</b>         | 87  | -0.292 | -1.109 | 0.248 | 0.316 | STAM2/CXCL1/PF4/IL13RA1/TNFRSF1B/SOCS1/IL17RA/PLA2G2A/IL6/IL9R/IL12RB1/PTPN2/EBI3/BAK1/IL2RG/GRB2/TNFRSF21/PIM1/CSF1/CXCL11/CD38/PTPN11/CD14/CXCL9/TNFRSF12A/PTPN1/IL2RA/CXCL10/SOCS3/CXCL13/CCR1/STAT1                              |
| <b>HALLMARK_COMPLEMENT</b>                      | 194 | 0.264  | 1.099  | 0.254 | 0.316 | COL4A2/FN1/LRP1/NOTCH4/SERPINC1/S100A9/SPOCK2/SERPINC1/C9/HNF4A/CLU/CDH13/DOCK9/TIMP2/TIMP1/ITIH1/CFB/ANG/S100A12/HSPA1A/CSRP1/PLG/FCN1/SERPINA1/CASP10/BRPF3/CTSO/CASP9/F2/CP/CFH/SERPINE1/KLKB1/ZEB1/PDGF/F10/PSEN1/SERPINB2/MMP8  |
| <b>HALLMARK_APICAL_SURFACE</b>                  | 44  | 0.351  | 1.129  | 0.259 | 0.316 | THY1/APP/CX3CL1                                                                                                                                                                                                                      |
| <b>HALLMARK_REACTIVE_OXYGEN_SPECIES_PATHWAY</b> | 46  | 0.344  | 1.116  | 0.277 | 0.330 | MGST1/CAT/PFKP/PDLIM1/SOD1/G6PD/GLRX2/MPO/JUNB/GLRX/SOD2/STK25/PDX4/ATOX1/NQO1/EGLN2/MSRA                                                                                                                                            |
| <b>HALLMARK_KRAS_SIGNALING_DN</b>               | 194 | 0.259  | 1.077  | 0.295 | 0.343 | SLC6A3/AKR1B10/ZBTB16/SYNPO/FGF16/CPB1/KRT5/CLPS/ITIH3/CAMK1D/BTG2/C5/EDN2/SEPP1/EDN1/THNSL2/PLAG1/HSD11B2/KCNE2/KRT1/ABCB11/NRIP2/SRK1/UGT2B17/TGM1/SLC38A3/CLSTN3/TCF7L1/SERPINB2/CD40LG/ADCK3/SERPINA10/CYP39A1/KRT15/KCNMB1      |
| <b>HALLMARK_UV_RESPONSE_UP</b>                  | 155 | -0.255 | -1.054 | 0.354 | 0.402 | IL6/MSX1/RAB27A/CHKA/ASNS/MAPK8IP2/LYN/GAL/GRINA/BMP2/RPN1/ICAM1/FEN1/RASGRP1/AP2S1/TUBA4A/BTG3/SLC6A12/BAK1/PTPRD/CLTB/PPP1R2/EPCAM/POLE3/PDAP1/ATP6V1C1/DNAJA1/CYB5B/HSPA2/H2AFX/GPX3/YKT6/EIF2S3/GLS/TFRC/RRAD/TAP1/ATP6V1F/DDX21 |
| <b>HALLMARK_PI3K_AKT_MTOR_SIGNALING</b>         | 105 | -0.267 | -1.043 | 0.362 | 0.403 | PFN1/CDK1/TBK1/TRAF2/PIN1/IRAK4/PPP1CA/E2F1/HRAS/DAPP1/SMAD2/YWHA/B/CFL1/DDIT3/PRKAR2A/NCK1/ITPR2/MKNK1/PITX2/MAPK10/EIF4E/GSK3B/CLTC/FGF22/MAP2K3/ACACA/ARHGDI3/THEM4/IL2RG/PRKAG1/GRB2/SFN/RAC1/PTPN11/ACTR3/CDK4/ARPC3/DUSP3      |
| <b>HALLMARK_SPERMATOGENESIS</b>                 | 134 | -0.250 | -1.020 | 0.404 | 0.439 | TLE4/GPR182/TALDO1/STAM2/PRKAR2A/VDAC3/TTK/TOBP1/PSMG1/ART3/DNAJB8/IDE/CRISP2/PGS1/TNNI3/MLF1/BUB1/ZNRF4/CSNK2A2/MEP1B/CHFR/DBF4/ADCYAP1/DMRT1/ODF1/GSG1/HSPA2/AGFG1/TNP1/CFTR/NF2/GSTM3/PCSK1N                                      |
| <b>HALLMARK_PROTEIN_SECRETION</b>               | 96  | -0.263 | -1.014 | 0.434 | 0.462 | CLCN3/SEC22B/ARFGEF2/COPB2/AP2B1/SNAP23/ARFGEF1/VAMP7/CLTC/TSPAN8/RAB5A/GLA/RAB14/AP2S1/SNX2/DNM1L/VAMP3/GOLGA4/ATP6V1H/SCRN1/M6PR/YKT6/ADAM10/CLTA/CTSC                                                                             |
| <b>HALLMARK_IL2_STAT5_SIGNALING</b>             | 196 | 0.239  | 0.997  | 0.463 | 0.482 | PLIN2/RHOB/NDRG1/SERPINC1/NRP1/ANXA4/DHRS3/SELL/SPRY4/P4HA1/SMPDL3A/COL6A1/RORA/IL3RA/ECM1/LTB/PTCH1/NT5E/KLF6/SH3BGRL2/ITGAV/CD81/BCL2/SYT11/MYO1C/FURIN/GUCY1B3/SHE/SERPINB6/APLP1/DENND5A/GPR83/FITM3/CA2/TNFSF10/CD79B           |
| <b>HALLMARK_PANCREAS_BETA_CELLS</b>             | 40  | -0.283 | -0.932 | 0.586 | 0.598 | SRP14/PAX6/INSM1/NEUROG3/DPP4/MAP2K4/ELP4/SEC11A/SPCS1/PCSK2/NKX2-2/CHGA/PAK3                                                                                                                                                        |

|                                 |     |        |        |       |       |                                                                                                                                                                                                                                                                                                                 |
|---------------------------------|-----|--------|--------|-------|-------|-----------------------------------------------------------------------------------------------------------------------------------------------------------------------------------------------------------------------------------------------------------------------------------------------------------------|
| <b>HALLMARK_DNA_R<br/>EPAIR</b> | 141 | -0.159 | -0.656 | 0.998 | 0.998 | POLR1D/MRPL40/GTF2A2/NME1/CLP1/N<br>UDT9/RFC3/CSTF3/ERCC2/RALA/DUT/P<br>OLR2D/RAD52/SNAPC5/PNP/GTF2H3/CD<br>A/PCNA/POLR3C/TK2/ITPA/ZNRD1/RNMT<br>/RAD51/AK1/BOLA2/POLB/TSG101/TYMS/<br>ADRM1/POLR2K/ERCC4/POLD1/COX17/P<br>OM121/RPA3/NCBP2/ZNF707/ARL6IP1/F<br>EN1/MPG/DGUOK/NUDT21/NME3/TAF13/<br>EIF1B/SDCBP |
|---------------------------------|-----|--------|--------|-------|-------|-----------------------------------------------------------------------------------------------------------------------------------------------------------------------------------------------------------------------------------------------------------------------------------------------------------------|

Supplementary table 6. Raw data for COMPARZ ssGSEA analysis (appendix p 11).

| Immune Feature      | mean_Z_diff | pvalue | p.adjust | -LOG10(P) |
|---------------------|-------------|--------|----------|-----------|
| pDC                 | 0.355       | 0.003  | 0.091    | 2.505     |
| Neutrophils_SS      | 0.260       | 0.051  | 0.474    | 1.295     |
| Tem_cells           | 0.238       | 0.060  | 0.474    | 1.224     |
| Eosinophils_SS      | 0.218       | 0.065  | 0.474    | 1.185     |
| NK_cells            | 0.199       | 0.115  | 0.667    | 0.939     |
| Treg_cells          | 0.115       | 0.445  | 0.897    | 0.352     |
| Mast_cells          | 0.099       | 0.520  | 0.897    | 0.284     |
| NK_CD56dim_cells    | 0.080       | 0.638  | 0.897    | 0.195     |
| Tgd_cells           | 0.055       | 0.616  | 0.897    | 0.211     |
| iDC                 | 0.054       | 0.729  | 0.897    | 0.137     |
| Th17_cells          | 0.047       | 0.473  | 0.897    | 0.326     |
| CTLA4               | 0.045       | 0.702  | 0.897    | 0.154     |
| Cytotoxic_cells     | 0.041       | 0.743  | 0.897    | 0.129     |
| Tcm_cells           | 0.038       | 0.654  | 0.897    | 0.184     |
| T_helper_cells      | 0.035       | 0.738  | 0.897    | 0.132     |
| Th1_cells           | 0.033       | 0.729  | 0.897    | 0.137     |
| B_cells             | 0.023       | 0.896  | 0.962    | 0.048     |
| Th2_cells           | 0.018       | 0.435  | 0.897    | 0.362     |
| APM2                | 0.008       | 0.809  | 0.938    | 0.092     |
| Tfh_cells           | -0.012      | 0.995  | 1.000    | 0.002     |
| NK_CD56bright_cells | -0.041      | 1.000  | 1.000    | 0.000     |
| CD8_T_cells         | -0.051      | 0.663  | 0.897    | 0.179     |
| DC                  | -0.053      | 0.364  | 0.897    | 0.439     |
| Macrophages         | -0.063      | 0.881  | 0.962    | 0.055     |
| aDC                 | -0.074      | 0.516  | 0.897    | 0.287     |
| APM1                | -0.112      | 0.437  | 0.897    | 0.360     |
| T_cells             | -0.113      | 0.313  | 0.897    | 0.504     |
| PD1                 | -0.121      | 0.210  | 0.869    | 0.678     |
| PDL1                | -0.293      | 0.201  | 0.869    | 0.698     |

Supplementary table 7. Raw data for TCGA ssGSEA analysis (appendix p 19).

| Immune Feature      | mean_Z_diff | pvalue | p.adjust | -LOG10(P) |
|---------------------|-------------|--------|----------|-----------|
| Mast_cells          | 0.717       | 0.002  | 0.047    | 2.792     |
| Th17_cells          | 0.516       | 0.334  | 0.693    | 0.476     |
| Tem_cells           | 0.429       | 0.065  | 0.624    | 1.190     |
| Neutrophils         | 0.415       | 0.094  | 0.667    | 1.028     |
| iDC                 | 0.388       | 0.168  | 0.667    | 0.775     |
| Tcm_cells           | 0.360       | 0.139  | 0.667    | 0.858     |
| NK_cells            | 0.355       | 0.121  | 0.667    | 0.918     |
| DC                  | 0.333       | 0.272  | 0.693    | 0.565     |
| pDC                 | 0.255       | 0.319  | 0.693    | 0.496     |
| Tgd_cells           | 0.246       | 0.323  | 0.693    | 0.491     |
| Eosinophils         | 0.237       | 0.252  | 0.693    | 0.598     |
| Macrophages         | 0.173       | 0.519  | 0.903    | 0.285     |
| aDC                 | 0.132       | 0.405  | 0.783    | 0.392     |
| Tfh_cells           | 0.099       | 0.620  | 0.903    | 0.208     |
| CD8_T_cells         | 0.098       | 0.716  | 0.903    | 0.145     |
| B_cells             | 0.066       | 0.571  | 0.903    | 0.243     |
| T_helper_cells      | 0.052       | 0.781  | 0.906    | 0.107     |
| APM2                | 0.031       | 0.997  | 0.997    | 0.001     |
| NK_CD56dim_cells    | -0.014      | 0.682  | 0.903    | 0.166     |
| Th1_cells           | -0.022      | 0.854  | 0.918    | 0.068     |
| T_cells             | -0.027      | 0.947  | 0.981    | 0.024     |
| Th2_cells           | -0.048      | 0.758  | 0.906    | 0.121     |
| Cytotoxic_cells     | -0.070      | 0.716  | 0.903    | 0.145     |
| APM1                | -0.099      | 0.687  | 0.903    | 0.163     |
| Treg_cells          | -0.134      | 0.614  | 0.903    | 0.212     |
| PDL1                | -0.221      | 0.818  | 0.912    | 0.087     |
| PD1                 | -0.233      | 0.207  | 0.667    | 0.684     |
| CTLA4               | -0.279      | 0.185  | 0.667    | 0.732     |
| NK_CD56bright_cells | -0.532      | 0.009  | 0.130    | 2.049     |

**Supplementary table 8. Raw data for PNN IPA analysis in peritumoral fat cohort (appendix p 14).**

| Ingenuity Canonical Pathways                                           | $-\log_{10}(p\text{-value})$ | z-score         | Ratio | Molecules                                                                                                                                                                                                                                                                                                                                                                                                                                                      |
|------------------------------------------------------------------------|------------------------------|-----------------|-------|----------------------------------------------------------------------------------------------------------------------------------------------------------------------------------------------------------------------------------------------------------------------------------------------------------------------------------------------------------------------------------------------------------------------------------------------------------------|
| <b>Granulocyte Adhesion and Diapedesis</b>                             | 23.5                         |                 | 0.397 | C5,C5AR1,CCL16,CCL19,CCL2,CCL22,CCL23,CCL26,CCL28,CCL3,CC L4,CC L4L1/CC L4L2,CCL5,CCL8,CLDN10,CLDN2,CLDN4,CLDN9,CSF3,CSF3R,CX3CL1,CXCL1,CXCL10,CXCL11,CXCL13,CXCL14,CXCL16,CX CL3,CXCL8,CXCL9,CXCR2,CXCR4,FPR1,FPR2,FPR3,GNAI2,HRH2,IC AM1,IL18,IL18RAP,IL1B,IL1R1,IL1R2,IL1RL1,IL1RN,IL33,ITGA2,ITGA4,I TGA5,ITGAL,ITGB2,MMP25,MMP9,MSN,NGFR,PECAM1,PF4,PPBP,SD C1,SDC2,SDC3,SELE,SELL,SELP,SELPLG,THY1,TNF,TNFRSF11B,TN FRSF1B,XCL1,XCL2                     |
| <b>Th1 and Th2 Activation Pathway</b>                                  | 21.5                         |                 | 0.374 | ACVR2B,BHLHE41,CCR1,CCR4,CCR5,CD247,CD274,CD28,CD3D,CD3 E,CD4,CD86,CD8A,CXCR4,CXCR6,DLL4,FLT3,GATA3,GF11,HAVCR2,H LA-A,HLA-B,HLA-DMA,HLA-DMB,HLA-DOA,HLA-DPA1,HLA-DPB1,HLA- DQA1,HLA-DQA2,HLA-DQB1,HLA-DQB2,HLA-DRA,HLA-DRB1,HLA- DRB5,ICAM1,ICOS,IKZF1,IL10RA,IL12RB1,IL18,IL18R1,IL1RL1,IL2RG,I L33,IL4R,IL6,IRF1,IRS1,IRS2,ITGB2,JAK3,JUN,KLB,KLRC1,KLRD1,LGA LS9,mir-21,mir- 29,NFATC2,NOTCH2,PIK3R3,PIK3R5,PRKCQ,RUNX3,S1PR1,SOCS3,S PI1,TGFB1,TGFB2,VAV1 |
| <b>Th2 Pathway</b>                                                     | 17.7                         | 1.2185<br>43592 | 0.375 | ACVR2B,BHLHE41,CCR1,CCR4,CCR5,CD247,CD28,CD3D,CD3E,CD4, CD86,CXCR4,CXCR6,FLT3,GATA3,GF11,HLA-A,HLA-B,HLA-DMA,HLA- DMB,HLA-DOA,HLA-DPA1,HLA-DPB1,HLA-DQA1,HLA-DQA2,HLA- DQB1,HLA-DQB2,HLA-DRA,HLA-DRB1,HLA- DRB5,ICAM1,ICOS,IKZF1,IL12RB1,IL1RL1,IL2RG,IL33,IL4R,IRS1,IRS2,I TGB2,JAK3,JUN,KLB,mir- 21,NFATC2,NOTCH2,PIK3R3,PIK3R5,PRKCQ,RUNX3,S1PR1,SOCS3,S PI1,TGFB1,TGFB2,VAV1                                                                               |
| <b>Th1 Pathway</b>                                                     | 17.2                         | 4.2177<br>56949 | 0.387 | CCR5,CD247,CD274,CD28,CD3D,CD3E,CD4,CD86,CD8A,DLL4,FLT3,G ATA3,HAVCR2,HLA-A,HLA-B,HLA-DMA,HLA-DMB,HLA-DOA,HLA- DPA1,HLA-DPB1,HLA-DQA1,HLA-DQA2,HLA-DQB1,HLA-DQB2,HLA- DRA,HLA-DRB1,HLA- DRB5,ICAM1,ICOS,IL10RA,IL12RB1,IL18,IL18R1,IL6,IRF1,IRS1,IRS2,IT GB2,JAK3,KLB,KLRC1,KLRD1,LGALS9,mir-21,mir- 29,NFATC2,NOTCH2,PIK3R3,PIK3R5,PRKCQ,RUNX3,SOCS3,VAV1                                                                                                     |
| <b>CD28 Signaling in T Helper Cells</b>                                | 14.8                         | 3.3074<br>75463 | 0.366 | ACTR3,AKT2,ARPC1B,ARPC2,ARPC3,ARPC4,ARPC5,ARPC5L,CARD1 1,CD247,CD28,CD3D,CD3E,CD4,CD86,CHP1,FCER1G,FLT3,GRAP2,H LA-A,HLA-B,HLA-DMA,HLA-DMB,HLA-DOA,HLA-DQA1,HLA-DQB1,HLA- DRA,HLA-DRB1,HLA- DRB5,IKBKE,IRS1,IRS2,ITK,ITPR2,JUN,KLB,LCK,LCP2,MAPK10,NFAT C2,NFKBIE,PIK3R3,PIK3R5,PRKCQ,PTPN6,PTPRC,SYK,VAV1,WAS                                                                                                                                                 |
| <b>Agranulocyte Adhesion and Diapedesis</b>                            | 13.7                         |                 | 0.307 | ACTB,ACTG1,C5,C5AR1,CCL16,CCL19,CCL2,CCL22,CCL23,CCL26,CC L28,CCL3,CCL4,CCL4L1/CC L4L2,CCL5,CCL8,CLDN10,CLDN2,CLDN4, CLDN9,CX3CL1,CXCL1,CXCL10,CXCL11,CXCL13,CXCL14,CXCL16,CX CL3,CXCL8,CXCL9,CXCR1,CXCR2,CXCR4,GNAI2,ICAM1,IL18,IL1B,IL1 R1,IL1RN,IL33,ITGA2,ITGA4,ITGA5,ITGB2,MMP25,MMP9,MSN,MYH7B, MYL4,PECAM1,PF4,PPBP,SELE,SELL,SELP,SELPLG,TNF,XCL1,XCL2                                                                                                 |
| <b>Antigen Presentation Pathway</b>                                    | 13.7                         |                 | 0.615 | B2M,CD74,CIITA,HLA-A,HLA-B,HLA-C,HLA-DMA,HLA-DMB,HLA- DOA,HLA-DPA1,HLA-DPB1,HLA-DQA1,HLA-DQA2,HLA-DQB1,HLA- DQB2,HLA-DRA,HLA-DRB1,HLA-DRB5,HLA- E,MR1,PSMB8,PSMB9,TAP1,TAP2                                                                                                                                                                                                                                                                                    |
| <b>Dendritic Cell Maturation</b>                                       | 12.1                         | 5.6317<br>83122 | 0.291 | AKT2,B2M,CCR7,CD1C,CD1D,CD86,COL10A1,FCER1G,FCGR1A,FCG R1B,FCGR2A,FCGR3A/FCGR3B,FLT3,HLA-A,HLA-B,HLA-C,HLA- DMA,HLA-DMB,HLA-DOA,HLA-DQA1,HLA-DQB1,HLA-DRA,HLA- DRB1,HLA- DRB5,IKBKE,IL15,IL18,IL1B,IL1RN,IL32,IL33,IL6,IRF8,IRS1,IRS2 ,KLB,LEP,LTB,LY75,MAPK10,MYD88,NFKBIE,NGFR,PIK3R3,PIK3R5,PL CB2,PLCB4,PLCD4,PLCG2,RELB,TLR2,TNF,TNFRSF11B,TNFRSF1B,T REM2,TYROBP                                                                                         |
| <b>Fcγ Receptor-mediated Phagocytosis in Macrophages and Monocytes</b> | 11.7                         | 5               | 0.383 | ACTB,ACTG1,ACTR3,AKT2,ARPC1B,ARPC2,ARPC3,ARPC4,ARPC5,A RPC5L,FCGR1A,FCGR2A,FCGR3A/FCGR3B,FGR,FYB1,HCK,INPP5D,L CP2,LYN,MYO5A,NCF1,PIK3R3,PLD1,PLD2,PLD4,PLD6,PRKCB,PRKC Q,PTK2B,RAC2,SYK,VASP,VAV1,VAV2,VAV3,WAS                                                                                                                                                                                                                                               |

|                                                                    |      |                 |       |                                                                                                                                                                                                                                                                                                                                                                                                                                                            |
|--------------------------------------------------------------------|------|-----------------|-------|------------------------------------------------------------------------------------------------------------------------------------------------------------------------------------------------------------------------------------------------------------------------------------------------------------------------------------------------------------------------------------------------------------------------------------------------------------|
| <b>TREM1 Signaling</b>                                             | 11.2 | 5.2085<br>53759 | 0.413 | AKT2,CASP1,CASP5,CCL2,CCL3,CD86,CIITA,CXCL3,CXCL8,ICAM1,IL18,IL1B,IL1RL1,IL6,ITGA5,ITGAX,LAT2,MYD88,NLRC4,NLRP12,NLRP2,NLRP3,NLRP6,NOD2,PLCG2,TLR10,TLR2,TLR8,TNF,TREM1,TYROBP                                                                                                                                                                                                                                                                             |
| <b>Graft-versus-Host Disease Signaling</b>                         | 11   |                 | 0.5   | CD28,CD86,FASLG,FCER1G,GZMB,HLA-A,HLA-B,HLA-C,HLA-DMA,HLA-DMB,HLA-DOA,HLA-DQA1,HLA-DQB1,HLA-DRA,HLA-DRB1,HLA-DRB5,HLA-E,IL18,IL1B,IL1RN,IL33,IL6,PRF1,TNF                                                                                                                                                                                                                                                                                                  |
| <b>T Helper Cell Differentiation</b>                               | 10.8 |                 | 0.411 | CD28,CD86,FCER1G,FOXP3,GATA3,HLA-A,HLA-B,HLA-DMA,HLA-DMB,HLA-DOA,HLA-DQA1,HLA-DQB1,HLA-DRA,HLA-DRB1,HLA-DRB5,ICOS,IL10RA,IL12RB1,IL18,IL18R1,IL2RG,IL4R,IL6,NGFR,RORC,TGFB1,TGFBR2,TNF,TNFRSF11B,TNFRSF1B                                                                                                                                                                                                                                                  |
| <b>Communication between Innate and Adaptive Immune Cells</b>      | 10.7 |                 | 0.365 | B2M,CCL3,CCL4,CCL5,CCR7,CD28,CD4,CD79A,CD79B,CD86,CD8A,CD8B,CXCL10,CXCL8,FCER1G,HLA-A,HLA-B,HLA-C,HLA-DRA,HLA-DRB1,HLA-DRB5,HLA-E,IGHD,IGHM,IL15,IL18,IL1B,IL1RN,IL33,IL6,TLR10,TLR2,TLR8,TNF,TNFRSF13B                                                                                                                                                                                                                                                    |
| <b>Type I Diabetes Mellitus Signaling</b>                          | 10.6 | 2.9848<br>10029 | 0.342 | BID,CASP3,CASP9,CD247,CD28,CD3D,CD3E,CD86,FASLG,FCER1G,GZMB,HLA-A,HLA-B,HLA-C,HLA-DMA,HLA-DMB,HLA-DOA,HLA-DQA1,HLA-DQB1,HLA-DRA,HLA-DRB1,HLA-DRB5,HLA-E,ICA1,IKBKE,IL1B,IL1R1,IRF1,MAP3K5,MAPK10,MYD88,NFKBIE,NGFR,PRF1,SOCS3,TNF,TNFRSF11B,TNFRSF1B                                                                                                                                                                                                       |
| <b>Leukocyte Extravasation Signaling</b>                           | 10.5 | 3.7527<br>7675  | 0.268 | ACTB,ACTG1,ACTN2,ARHGAP6,ARHGAP9,BMX,BTK,CD44,CLDN10,CLDN2,CLDN4,CLDN9,CTNNA2,CXCR4,EDIL3,FLT3,GNAI2,ICAM1,IRS1,IRS2,ITGA2,ITGA4,ITGA5,ITGAL,ITGB2,ITK,JAM2,KLB,MAPK10,MMP25,MMP9,MSN,NCF1,NCF2,NCF4,PECAM1,PIK3R3,PIK3R5,PLCG2,PRKC B,PRKCQ,PTK2B,RAC2,RAP1GAP,RASGRP1,RASSF5,RHOH,SELPLG,SPN,THY1,TIMP1,VASP,VAV1,VAV2,VAV3,WAS,WIPF1                                                                                                                    |
| <b>Role of NFAT in Regulation of the Immune Response</b>           | 10.5 | 5.2857<br>14286 | 0.276 | AKT2,BLNK,BTK,CD247,CD28,CD3D,CD3E,CD4,CD79A,CD79B,CD86,CHP1,FCER1A,FCER1G,FCGR1A,FCGR1B,FCGR2A,FCGR3A/FCGR3B,FLT3,GNA15,GNAI2,GNB4,NG2,HLA-A,HLA-B,HLA-DMA,HLA-DMB,HLA-DOA,HLA-DQA1,HLA-DQB1,HLA-DRA,HLA-DRB1,HLA-DRB5,IKBKE,IRS1,IRS2,ITK,ITPR2,JUN,KLB,LCK,LCP2,LYN,MEF2C,NFATC2,NFKBIE,PIK3R3,PIK3R5,PLCB2,PLCB4,PLCG2,PRKCQ,RCAN1,SYK                                                                                                                 |
| <b>Altered T Cell and B Cell Signaling in Rheumatoid Arthritis</b> | 10.2 |                 | 0.367 | CD28,CD79A,CD79B,CD86,CXCL13,FASLG,FCER1G,HLA-A,HLA-B,HLA-DMA,HLA-DMB,HLA-DOA,HLA-DQA1,HLA-DQB1,HLA-DRA,HLA-DRB1,HLA-DRB5,IL15,IL18,IL1B,IL1RN,IL33,IL6,LTB,RELB,SLAMF1,SPP1,TGFB1,TLR10,TLR2,TLR8,TNF,TNFSF13B                                                                                                                                                                                                                                            |
| <b>iCOS-iCOSL Signaling in T Helper Cells</b>                      | 10.1 | 3.4125<br>00739 | 0.32  | AKT2,CD247,CD28,CD3D,CD3E,CD4,CD86,CHP1,FCER1G,FLT3,GRAP2,HLA-A,HLA-B,HLA-DMA,HLA-DMB,HLA-DOA,HLA-DQA1,HLA-DQB1,HLA-DRA,HLA-DRB1,HLA-DRB5,ICOS,IKBKE,IL2RG,INPP5D,IRS1,IRS2,ITK,ITPR2,KLB,LCK,LCP2,NFATC2,NFKBIE,PIK3R3,PIK3R5,PRKCQ,PTPRC,TRAT1,VAV1                                                                                                                                                                                                      |
| <b>Cdc42 Signaling</b>                                             | 10.1 | 4.0166<br>32088 | 0.287 | ACTR3,ARPC1B,ARPC2,ARPC3,ARPC4,ARPC5,ARPC5L,B2M,CD247,CD3D,CD3E,CDC42SE1,CFL1,DIAPH1,DIAPH3,EXOC6,FCER1G,FGD3,HLA-A,HLA-B,HLA-C,HLA-DMA,HLA-DMB,HLA-DOA,HLA-DPA1,HLA-DPB1,HLA-DQA1,HLA-DQA2,HLA-DQB1,HLA-DQB2,HLA-DRA,HLA-DRB1,HLA-DRB5,HLA-E,IQGAP3,ITGA2,ITGA4,ITGA5,ITK,JUN,MAPK10,MYL12A,MYL4,MYLK,VAV1,VAV2,WAS,WIPF1                                                                                                                                 |
| <b>Neuroinflammation Signaling Pathway</b>                         | 10.1 | 4.6081<br>76876 | 0.233 | ACVR2B,AKT2,B2M,BACE2,BDNF,BIRC3,BIRC5,CASP1,CASP3,CCL2,CCL3,CCL5,CD86,CHP1,CX3CL1,CXCL10,CXCL8,FASLG,FLT3,GABRA2,GABRE,GRIN3A,HLA-A,HLA-B,HLA-C,HLA-DMA,HLA-DMB,HLA-DOA,HLA-DQA1,HLA-DQB1,HLA-DRA,HLA-DRB1,HLA-DRB5,ICAM1,IKBKE,IL18,IL1B,IL1R1,IL34,IL6,IRAK2,IRS1,IRS2,JAK3,JUN,KLB,MAPK10,MMP9,MYD88,NCF2,NFATC2,NLRP3,NOX4,P2RX7,PIK3R3,PIK3R5,PLA2G2A,PLA2G2D,PLCG2,PYCARD,S100B,SNCA,SYK,TGFB1,TGFBR2,TICAM2,TIRAP,TLR10,TLR2,TLR8,TNF,TREM2,TYROBP |
| <b>T Cell Exhaustion Signaling Pathway</b>                         | 9.52 | 2.4009<br>80192 | 0.268 | ACVR2B,AKT2,BATF,BTLA,CD274,CD28,CD86,EOMES,FCER1G,FLT3,GZMB,HAVCR2,HLA-A,HLA-B,HLA-C,HLA-DMA,HLA-DMB,HLA-DOA,HLA-DPA1,HLA-DPB1,HLA-DQA1,HLA-DQA2,HLA-DQB1,HLA-DQB2,HLA-DRA,HLA-DRB1,HLA-DRB5,HLA-E,IL10RA,IL12RB1,IL6,IRS1,IRS2,JAK3,JUN,KLB,LAG3,LGALS9,MAPK10,NFATC2,PIK3R3,PIK3R5,PLCG2,PPM1J,PPP2R5A,PRDM1,PRKCQ,PTPN6,TCF7,TGFB1,TGFBR2                                                                                                              |
| <b>B Cell Development</b>                                          | 9.35 |                 | 0.528 | CD19,CD79A,CD79B,CD86,HLA-A,HLA-B,HLA-DMA,HLA-DMB,HLA-DOA,HLA-DQA1,HLA-DQB1,HLA-DRA,HLA-DRB1,HLA-DRB5,IGHD,IGHM,IL7R,PTPRC,SPN                                                                                                                                                                                                                                                                                                                             |



|                                                                                       |      |                      |       |                                                                                                                                                                                                                                                                                                                                                                                                                                |
|---------------------------------------------------------------------------------------|------|----------------------|-------|--------------------------------------------------------------------------------------------------------------------------------------------------------------------------------------------------------------------------------------------------------------------------------------------------------------------------------------------------------------------------------------------------------------------------------|
| <b>Phagosome Formation</b>                                                            | 9.01 |                      | 0.293 | C3AR1,C5AR1,CLEC7A,CR1,CR2,FCAR,FCER1A,FCER1G,FCGR1A,FCGR1B,FCGR2A,FCGR3A/FCGR3B,FLT3,IRS1,IRS2,ITGA2,ITGA4,ITGA5,ITGAX,ITGB2,KLB,MSR1,PIK3R3,PIK3R5,PLCB2,PLCB4,PLCD4,PLCG2,PRKCB,PRKCQ,RAC2,RHOC,RHOG,RHOH,RHOU,RND1,SYK,TLR10,TLR2,TLR8,VTN                                                                                                                                                                                 |
| <b>Crosstalk between Dendritic Cells and Natural Killer Cells</b>                     | 9    |                      | 0.348 | ACTB,ACTG1,CCR7,CD226,CD28,CD69,CD86,CSF2RB,FASLG,HLA-A,HLA-B,HLA-C,HLA-DRA,HLA-DRB1,HLA-DRB5,HLA-E,IL15,IL18,IL2RG,IL3RA,IL6,ITGAL,KLRD1,LTB,MICB,NCR3,PRF1,TNF,TNFRSF1B,TREM2,TYROBP                                                                                                                                                                                                                                         |
| <b>Role of Macrophages, Fibroblasts and Endothelial Cells in Rheumatoid Arthritis</b> | 8.44 |                      | 0.217 | ADAMTS4,AKT2,C5,C5AR1,CCL2,CCL5,CCND1,CEBPA,CHP1,CXCL8,F2RL1,FCGR1A,FCGR3A/FCGR3B,FLT3,FRZB,FZD7,FZD9,ICAM1,IKBKE,IL15,IL18,IL18R1,IL18RAP,IL1B,IL1R1,IL1R2,IL1RL1,IL1RN,IL32,IL33,IL6,IRAK2,IRS1,IRS2,JUN,KLB,LEF1,LTB,MYC,MYD88,NFATC2,NFKBIE,NGFR,OSM,PDGFA,PIK3R3,PIK3R5,PLCB2,PLCB4,PLCD4,PLCG2,PRKCB,PRKCQ,ROR2,SELE,SFRP2,SFRP4,SOCS3,TCF7,TGFB1,TLR10,TLR2,TLR8,TNF,TNFRSF11B,TNFRSF1B,TNFSF13B,TRAF4,VEGFC,WNT2B,WNT3 |
| <b>LXR/RXR Activation</b>                                                             | 8.2  | -<br>3.0532<br>90134 | 0.298 | ABCG1,ALB,APOC1,APOL1,CCL2,CD14,CLU,FDFT1,HADH,IL18,IL18RAP,IL1B,IL1R1,IL1R2,IL1RL1,IL1RN,IL33,IL6,LBP,LY96,LYZ,MLXIPL,MM P9,MSR1,MYLIP,NGFR,PLTP,PON3,S100A8,SA A1,SERPINA1,TF,TNF,TNFRSF11B,TNFRSF1B,VTN                                                                                                                                                                                                                     |
| <b>Inflammasome pathway</b>                                                           | 8.08 | 3.6055<br>51275      | 0.65  | AIM2,CASP1,CASP5,CTSB,IL18,IL1B,MYD88,NLRC4,NLRP1,NLRP3,NOD2,P2RX7,PYCARD                                                                                                                                                                                                                                                                                                                                                      |
| <b>Atherosclerosis Signaling</b>                                                      | 8.03 |                      | 0.289 | ALB,ALOX15B,ALOX5,APOC1,APOL1,CCL2,CCR2,CLU,COL10A1,CXCL8,CXCR4,ICAM1,IL18,IL1B,IL1RN,IL33,IL6,ITGA4,ITGB2,LYZ,MMP9,MSR1,PAFAH1B3,PDGFA,PLA2G16,PLA2G2A,PLA2G2D,PLA2G7,PLB1,RARRES3,S100A8,SELE,SELP,SELPLG,SERPINA1,TGFB1,TNF                                                                                                                                                                                                 |
| <b>Role of Pattern Recognition Receptors in Recognition of Bacteria and Viruses</b>   | 7.87 | 2.4494<br>89743      | 0.26  | C1QA,C1QB,C3AR1,C5,C5AR1,CASP1,CCL5,CLCF1,CLEC7A,CXCL8,FASLG,FLT3,IL15,IL18,IL1B,IL33,IL6,IRS1,IRS2,KLB,LEP,LTB,MAPK10,MAVS,MYD88,NLRC4,NLRP3,NOD2,OAS2,OSM,PIK3R3,PIK3R5,PLCG2,PRKCB,PRKCQ,PTX3,SYK,TGFB1,TLR2,TLR8,TNF,TNFSF13B,TNFSF15,TNFSF8                                                                                                                                                                               |
| <b>CTLA4 Signaling in Cytotoxic T Lymphocytes</b>                                     | 7.5  |                      | 0.307 | AKT2,AP1M2,AP1S2,AP2S1,B2M,CD247,CD28,CD3D,CD3E,CD86,CD8A,CD8B,FCER1G,FLT3,GRAP2,HLA-A,HLA-B,HLA-C,IRS1,IRS2,KLB,LCK,LCP2,PIK3R3,PIK3R5,PPM1J,PPP2R5A,PTPN22,PTPN6,SYK,TRAT1                                                                                                                                                                                                                                                   |
| <b>Tec Kinase Signaling</b>                                                           | 7.46 | 4.6666<br>66667      | 0.25  | ACTB,ACTG1,BLK,BMX,BTK,FASLG,FCER1A,FCER1G,FGR,FLT3,GNA15,GNAI2,GNB4,GNG2,HCK,IRS1,IRS2,ITGA2,ITGA4,ITGA5,ITK,JAK3,KLB,LCK,LYN,MAPK10,PIK3R3,PIK3R5,PLCG2,PRKCB,PRKCQ,PTK2B,RAC2,RHOC,RHOG,RHOH,RHOU,RND1,TNF,TNFRSF10A,TNFRSF10B,VAV1,VAV2,VAV3,WAS                                                                                                                                                                           |
| <b>Primary Immunodeficiency Signaling</b>                                             | 7.19 |                      | 0.4   | BLNK,BTK,CD19,CD3D,CD3E,CD4,CD79A,CD8A,CIITA,ICOS,IGHD,IGHM,IGLL1/IGLL5,IL2RG,IL7R,JAK3,LCK,PTPRC,TAP1,TAP2                                                                                                                                                                                                                                                                                                                    |
| <b>Natural Killer Cell Signaling</b>                                                  | 7.03 |                      | 0.271 | AKT2,CD244,CD247,CD300A,FCER1G,FCGR2A,FCGR3A/FCGR3B,FLT3,HCST,INPP5D,INPP5J,IRS1,IRS2,KLB,KLRB1,KLRC1,KLRD1,LCK,LCP2,LILRB1,NCR3,PIK3R3,PIK3R5,PLCG2,PRKCB,PRKCQ,PTPN6,RAC2,SH2D1A,SIGLEC7,SYK,SYNJ2,TYROBP,VAV1,VAV2,VAV3                                                                                                                                                                                                     |
| <b>Hepatic Fibrosis / Hepatic Stellate Cell Activation</b>                            | 7    |                      | 0.242 | A2M,BAX,CCL2,CCL5,CCR5,CCR7,CD14,COL10A1,COL11A1,COL24A1,COL6A6,CTGF,CXCL3,CXCL8,CXCL9,FASLG,HGF,ICAM1,IGFBP4,IL10RA,IL18RAP,IL1B,IL1R1,IL1R2,IL1RL1,IL4R,IL6,KLF6,LBP,LEP,LY96,MMP9,MYH7B,MYL4,NGFR,PDGFA,SERPINE1,TGFA,TGFB1,TGFB2,TIMP1,TNF,TNFRSF11B,TNFRSF1B,VEGFC                                                                                                                                                        |
| <b>Pathogenesis of Multiple Sclerosis</b>                                             | 6.87 |                      | 0.889 | CCL3,CCL4,CCL5,CCR1,CCR5,CXCL10,CXCL11,CXCL9                                                                                                                                                                                                                                                                                                                                                                                   |
| <b>PKCθ Signaling in T Lymphocytes</b>                                                | 6.85 | 4.6437<br>1646       | 0.247 | CACNA2D3,CACNG8,CARD11,CD247,CD28,CD3D,CD3E,CD4,CD86,CHP1,FCER1G,FLT3,GRAP2,HLA-A,HLA-B,HLA-DMA,HLA-DMB,HLA-DOA,HLA-DQA1,HLA-DQB1,HLA-DRA,HLA-DRB1,HLA-DRB5,IKBKE,IRS1,IRS2,JUN,KLB,LCK,LCP2,MAP3K5,MAP3K8,NFATC2,NFKBIE,PIK3R3,PIK3R5,PLCG2,PRKCQ,RAC2,VAV1,VAV2,VAV3                                                                                                                                                         |
| <b>Hepatic Cholestasis</b>                                                            | 6.71 |                      | 0.239 | ABCB1,ABCC3,ADCY6,ATP8B1,CD14,CLCF1,CXCL8,FASLG,IKBKE,IL15,IL18,IL18RAP,IL1B,IL1R1,IL1R2,IL1RL1,IL1RN,IL33,IL6,INSR,IRAK2,JUN,LBP,LEP,LTB,LY96,MAPK10,MYD88,NFKBIE,NGFR,OSM,PPARA,P                                                                                                                                                                                                                                            |

|                                                                                  |      |                 |       |                                                                                                                                                                                                                                                                                                                                                                                                                                                                                                                                               |
|----------------------------------------------------------------------------------|------|-----------------|-------|-----------------------------------------------------------------------------------------------------------------------------------------------------------------------------------------------------------------------------------------------------------------------------------------------------------------------------------------------------------------------------------------------------------------------------------------------------------------------------------------------------------------------------------------------|
|                                                                                  |      |                 |       | RKCB,PRKCQ,SLCO3A1,TGFB1,TIRAP,TJP2,TNF,TNFRSF11B,TNFRSF1B,TNFSF13B,TNFSF15,TNFSF8                                                                                                                                                                                                                                                                                                                                                                                                                                                            |
| <b>B Cell Receptor Signaling</b>                                                 | 6.66 | 3.7947<br>33192 | 0.234 | AKT2,BCL2A1,BLNK,BTK,CD19,CD22,CD79A,CD79B,CFL1,DAPP1,FCGR2A,FLT3,IGHD,IGHM,IKBKE,INPP5D,INPP5J,IRS1,IRS2,JUN,KLB,LYN,MAP3K5,MAP3K8,MEF2C,NFATC2,NFKBIE,PAG1,PAX5,PIK3AP1,PIK3R3,PIK3R5,PLCG2,POU2F2,PRKCB,PRKCQ,PTK2B,PTPN6,PTPRC,RAC2,RASSF5,SYK,SYNJ2,VAV1,VAV2,VAV3                                                                                                                                                                                                                                                                       |
| <b>Production of Nitric Oxide and Reactive Oxygen Species in Macrophages</b>     | 6.6  | 3.3946<br>73699 | 0.23  | AKT2,ALB,APOC1,APOL1,CAT,CLU,FLT3,IKBKE,IRF1,IRF8,IRS1,IRS2,JAK3,JUN,KLB,LYZ,MAP3K5,MAP3K8,MAPK10,NCF1,NCF2,NCF4,NFKBIE,NGFR,PIK3R3,PIK3R5,PLCG2,PPARA,PPM1J,PPP1R14B,PPP2R5A,PRKCB,PRKCQ,PTPN6,RAC2,RHOC,RHOG,RHOH,RHOU,RND1,S100A8,SERPINA1,SPI1,TLR2,TNF,TNFRSF11B,TNFRSF1B                                                                                                                                                                                                                                                                |
| <b>Osteoarthritis Pathway</b>                                                    | 6.49 | 4.2166<br>91571 | 0.226 | ADAMTS4,ADIPOQ,ALPL,BMP2,CASP1,CASP3,CASP4,CASP5,CASP9,COL10A1,CTNNA2,CXCL8,CXCR2,FRZB,FZD7,FZD9,GLI3,GLIS1,HIF1A,HTRA1,IL18RAP,IL1B,IL1R1,IL1R2,IL1RL1,ITGA2,ITGA4,ITGA5,LEF1,LEP,MEF2C,MMP9,NAMPT,P2RX7,PTCH1,RUNX2,S100A8,S100A9,SMAD6,SPHK1,SPP1,TCF7,TGFB1,TGFBR2,TLR2,TNF,TNFRSF1B,VEGFC                                                                                                                                                                                                                                                |
| <b>IL-10 Signaling</b>                                                           | 6.45 |                 | 0.333 | BLVRA,CCR1,CCR5,CD14,FCGR2A,IKBKE,IL10RA,IL18,IL18RAP,IL1B,IL1R1,IL1R2,IL1RL1,IL1RN,IL33,IL4R,IL6,JUN,LBP,MAP4K4,NFKBIE,SOCS3,TNF                                                                                                                                                                                                                                                                                                                                                                                                             |
| <b>IL-8 Signaling</b>                                                            | 6.3  | 3.6181<br>36135 | 0.223 | AKT2,ANGPT2,ARRB2,BAX,CCND1,CR2,CXCL1,CXCL8,CXCR1,CXCR2,EIF4EBP1,FLT3,GNAI2,GNB4,GNG2,HBEGF,ICAM1,IKBKE,IRAK2,IRS1,IRS2,ITGAX,ITGB2,JUN,KLB,MAP4K4,MAPK10,MMP9,NCF2,NOX4,PIK3R3,PIK3R5,PLCB2,PLD1,PLD2,PLD4,PLD6,PRKCB,PRKCQ,PTK2B,RAC2,RHOC,RHOG,RHOH,RHOU,RND1,VASP,VEGFC                                                                                                                                                                                                                                                                   |
| <b>Autoimmune Thyroid Disease Signaling</b>                                      | 5.88 |                 | 0.367 | CD28,CD86,FASLG,FCER1G,GZMB,HLA-A,HLA-B,HLA-C,HLA-DMA,HLA-DMB,HLA-DOA,HLA-DQA1,HLA-DQB1,HLA-DRA,HLA-DRB1,HLA-DRB5,HLA-E,PRF1                                                                                                                                                                                                                                                                                                                                                                                                                  |
| <b>Role of Osteoblasts, Osteoclasts and Chondrocytes in Rheumatoid Arthritis</b> | 5.82 |                 | 0.212 | ADAMTS4,AKT2,ALPL,BIRC3,BMP2,BMP3,CASP9,CHP1,FLT3,FRZB,FZD7,FZD9,IKBKE,IL18,IL18R1,IL18RAP,IL1B,IL1R1,IL1R2,IL1RL1,IL1RN,IL33,IL6,IRS1,IRS2,ITGA2,ITGA5,JUN,KLB,LEF1,MAP3K5,MAPK10,NFATC2,NFKBIE,NGFR,PIK3R3,PIK3R5,PTK2B,RUNX2,SFRP2,SFRP4,SMAD6,SPP1,TCF7,TGFB1,TNF,TNFRSF11B,TNFRSF1B,WNT2B,WNT3                                                                                                                                                                                                                                           |
| <b>Cytotoxic T Lymphocyte-mediated Apoptosis of Target Cells</b>                 | 5.77 | 2.5298<br>22128 | 0.438 | B2M,BID,CASP3,CASP9,CD247,CD3D,CD3E,FASLG,FCER1G,GZMB,HLA-A,HLA-B,HLA-C,PRF1                                                                                                                                                                                                                                                                                                                                                                                                                                                                  |
| <b>T Cell Receptor Signaling</b>                                                 | 5.67 |                 | 0.258 | BMX,BTK,CARD11,CD247,CD28,CD3D,CD3E,CD4,CD8A,CD8B,FLT3,GRAP2,IKBKE,IRS1,IRS2,ITK,JUN,KLB,LCK,LCP2,NFATC2,PAG1,PIK3R3,PIK3R5,PRKCQ,PTPN7,PTPRC,RASGRP1,VAV1,VAV2,VAV3                                                                                                                                                                                                                                                                                                                                                                          |
| <b>Cardiac Hypertrophy Signaling (Enhanced)</b>                                  | 5.63 | 3.8497<br>41916 | 0.175 | ACVR2B,ADCY6,AKAP13,AKT2,CHP1,CLCF1,CSF2RB,CTF1,CXCL8,CXCR1,CXCR2,DIAPH1,DIAPH3,EIF4EBP1,FASLG,FGF10,FGF11,FGF7,FGFRL1,FLT3,FZD7,FZD9,GNA15,GNAI2,GNG2,IFNLR1,IKBKE,IL10RA,IL12RB1,IL15,IL18,IL18R1,IL18RAP,IL1B,IL1R1,IL1R2,IL1RL1,IL20RA,IL20RB,IL2RG,IL33,IL3RA,IL4R,IL6,IL7R,IRS1,IRS2,ITGA2,ITGA4,ITGA5,ITPR2,JUN,KLB,LEP,LTB,MAP3K5,MAP3K8,MAPK10,MEF2C,MYC,NFATC2,NGFR,NPR1,OSM,PDE11A,PDE1B,PDE3A,PIK3R3,PIK3R5,PLCB2,PLCB4,PLCD4,PLCG2,PLD6,PRKCB,PRKCQ,RCAN1,TGFB1,TGFBR2,TNF,TNFRSF11B,TNFRSF1B,TNFSF13B,TNFSF15,TNFSF8,WNT2B,WNT3 |
| <b>Calcium-induced T Lymphocyte Apoptosis</b>                                    | 5.58 | 4.0249<br>22359 | 0.318 | CD247,CD3D,CD3E,CD4,CHP1,FCER1G,HLA-A,HLA-B,HLA-DMA,HLA-DMB,HLA-DOA,HLA-DQA1,HLA-DQB1,HLA-DRA,HLA-DRB1,HLA-DRB5,ITPR2,LCK,NFATC2,PRKCB,PRKCQ                                                                                                                                                                                                                                                                                                                                                                                                  |
| <b>NF-κB Signaling</b>                                                           | 5.48 | 2.9673<br>01476 | 0.221 | AKT2,BMP2,CARD11,CSNK2A2,FCER1G,FLT3,IL18,IL1B,IL1R1,IL1R2,IL1RN,IL33,INSR,IRS1,IRS2,KLB,LCK,MAP3K8,MAP4K4,MYD88,NFKBIE,NGFR,NTRK1,NTRK3,PELI1,PIK3R3,PIK3R5,PLCG2,PRKCB,PRKCQ,RELB,TGFA,TGFBR2,TIRAP,TLR10,TLR2,TLR8,TNF,TNFAIP3,TNFRSF1B,TNFRSF1B,TNFSF13B                                                                                                                                                                                                                                                                                  |
| <b>STAT3 Pathway</b>                                                             | 5.42 | 1.1470<br>78669 | 0.244 | CDKN1A,CISH,CSF2RB,CXCR1,CXCR2,HGF,IFNLR1,IL10RA,IL12RB1,IL18R1,IL18RAP,IL1B,IL1R1,IL1R2,IL1RL1,IL20RA,IL20RB,IL2RG,IL3RA,IL4R,IL7R,INSR,MAPK10,MYC,NGFR,NTRK1,NTRK3,PIM1,PTPN6,SOC3,TGFA,TGFB1,TGFBR2                                                                                                                                                                                                                                                                                                                                        |

|                                                             |      |                 |       |                                                                                                                                                                                                                                                                                                                                                                                                                                                                                                                                                     |
|-------------------------------------------------------------|------|-----------------|-------|-----------------------------------------------------------------------------------------------------------------------------------------------------------------------------------------------------------------------------------------------------------------------------------------------------------------------------------------------------------------------------------------------------------------------------------------------------------------------------------------------------------------------------------------------------|
| <b>Signaling by Rho Family GTPases</b>                      | 5.3  | 3.6181<br>36135 | 0.201 | ACTB,ACTG1,ACTR3,ARHGEF19,ARHGEF2,ARHGEF3,ARPC1B,ARPC2,ARPC3,ARPC4,ARPC5,ARPC5L,CDC42EP3,CDH23,CDH24,CDH3,CF L1,CIT,DES,DIAPH3,FLT3,GNA15,GNAI2,GNB4,GNG2,IRS1,IRS2,ITGA 2,ITGA4,ITGA5,JUN,KLB,MAPK10,MSN,MYL12A,MYL4,MYLK,NCF2,NO X4,PIK3R3,PIK3R5,PLD1,PTK2B,RAC2,RHOC,RHOG,RHOH,RHOU,RN D1,STMN1,WAS,WIPF1                                                                                                                                                                                                                                       |
| <b>OX40 Signaling Pathway</b>                               | 5.3  | 0.7071<br>06781 | 0.278 | B2M,CD247,CD3D,CD3E,CD4,FCER1G,HLA-A,HLA-B,HLA-C,HLA-DMA,HLA-DMB,HLA-DOA,HLA-DPA1,HLA-DPB1,HLA-DQA1,HLA-DQA2,HLA-DQB1,HLA-DQB2,HLA-DRA,HLA-DRB1,HLA-DRB5,HLA-E,JUN,MAPK10,NFKBIE                                                                                                                                                                                                                                                                                                                                                                    |
| <b>Axonal Guidance Signaling</b>                            | 5.26 |                 | 0.172 | ABLIM2,ACTR3,ADAM11,ADAM23,ADAM28,ADAM32,ADAMTS1,ADAM TS10,ADAMTS4,AFG3L2,AKT2,ARPC1B,ARPC2,ARPC3,ARPC4,ARPC 5,ARPC5L,BDNF,BMP2,BMP3,CFL1,CHP1,CXCR4,ECE2,ECEL1,ENPE P,EPHA4,EPHA7,FLT3,FZD7,FZD9,GLI3,GLIS1,GNA15,GNAI2,GNB4,G NG2,IRS1,IRS2,ITGA2,ITGA4,ITGA5,KLB,MICAL1,MME,MMP25,MMP9, MYL12A,MYL4,NFATC2,NGFR,NTRK1,NTRK3,PDGFA,PFN1,PIK3R3,PI K3R5,PLCB2,PLCB4,PLCD4,PLCG2,PRKCB,PRKCQ,PTCH1,RAC2,RAS SF5,RND1,ROBO1,SDC2,SEMA4A,SEMA4D,SEMA4F,SEMA4G,SEMA6 B,TUBA1B,TUBA1C,TUBA3C/TUBA3D,TUBA4A,TUBA8,TUBB3,VASP,V EGFC,WAS,WIPF1,WNT2B,WNT3 |
| <b>HMGB1 Signaling</b>                                      | 5.25 | 2.8867<br>51346 | 0.221 | AKT2,CCL2,CLCF1,CXCL8,FASLG,FLT3,ICAM1,IL15,IL18,IL1B,IL1R1,IL 33,IL6,IRS1,IRS2,JUN,KLB,LEP,LTB,MAPK10,NGFR,OSM,PIK3R3,PIK3 R5,PLAT,RAC2,RHOC,RHOG,RHOH,RHOU,RND1,SELE,SERPINE1,TG FB1,TNF,TNFRSF11B,TNFRSF1B,TNFRSF13B,TNFRSF15,TNFRSF8                                                                                                                                                                                                                                                                                                            |
| <b>PI3K Signaling in B Lymphocytes</b>                      | 5.2  | 3.5282<br>11425 | 0.239 | AKT2,ATF3,ATF7,BLK,BLNK,BTK,CD19,CD79A,CD79B,CHP1,CR2,DAP P1,IKBKE,IL4R,INPP5D,IRS1,IRS2,ITPR2,JUN,LYN,NFATC2,NFKBIE,PI K3AP1,PLCB2,PLCB4,PLCD4,PLCG2,PRKCB,PTPRC,SYK,VAV1,VAV2, VAV3                                                                                                                                                                                                                                                                                                                                                               |
| <b>Actin Cytoskeleton Signaling</b>                         | 5.2  | 3.7811<br>76708 | 0.205 | ACTB,ACTG1,ACTN2,ACTR3,ARHGAP24,ARPC1B,ARPC2,ARPC3,ARP C4,ARPC5,ARPC5L,CD14,CFL1,CYFIP2,DIAPH1,DIAPH3,F2R,FGD3,F GF10,FGF11,FGF7,FLT3,IQGAP3,IRS1,IRS2,ITGA2,ITGA4,ITGA5,KLB,L BP,MATK,MSN,MYH7B,MYL12A,MYL4,MYLK,NCKAP1L,PDGFA,PFN1, PIK3R3,PIK3R5,RAC2,SIAM1,TMSB10/TMSB4X,VAV1,VAV2,VAV3,WAS                                                                                                                                                                                                                                                     |
| <b>Nur77 Signaling in T Lymphocytes</b>                     | 5.19 |                 | 0.322 | CASP3,CASP9,CD247,CD28,CD3D,CD3E,CD86,CHP1,FCER1G,HLA-A,HLA-B,HLA-DMA,HLA-DMB,HLA-DOA,HLA-DQA1,HLA-DQB1,HLA-DRA,HLA-DRB1,HLA-DRB5                                                                                                                                                                                                                                                                                                                                                                                                                   |
| <b>Allograft Rejection Signaling</b>                        | 5.15 |                 | 0.279 | B2M,CD28,CD86,FASLG,FCER1G,GZMB,HLA-A,HLA-B,HLA-C,HLA-DMA,HLA-DMB,HLA-DOA,HLA-DPA1,HLA-DPB1,HLA-DQA1,HLA-DQA2,HLA-DQB1,HLA-DQB2,HLA-DRA,HLA-DRB1,HLA-DRB5,HLA-E,PRF1,TNF                                                                                                                                                                                                                                                                                                                                                                            |
| <b>IL-6 Signaling</b>                                       | 5.13 | 3.2863<br>35345 | 0.237 | A2M,ABCB1,AKT2,CD14,CSNK2A2,CXCL8,FLT3,IKBKE,IL18,IL18RAP,I L1B,IL1R1,IL1R2,IL1RL1,IL1RN,IL33,IL6,IRS1,IRS2,JUN,KLB,LBP,MAP4 K4,MAPK10,MCL1,NFKBIE,NGFR,PIK3R3,PIK3R5,SOCS3,TNF,TNFRS F11B,TNFRSF1B                                                                                                                                                                                                                                                                                                                                                 |
| <b>Integrin Signaling</b>                                   | 5.12 | 3.7032<br>80399 | 0.205 | ACTB,ACTG1,ACTN2,ACTR3,AKT2,ARF4,ARPC1B,ARPC2,ARPC3,ARP C4,ARPC5,ARPC5L,ASAP1,CAPN6,CAPN8,CAPN9,FLT3,IRS1,IRS2,IT GA2,ITGA4,ITGA5,ITGA8,ITGAD,ITGAL,ITGAX,ITGB2,ITGB4,KLB,MYL 12A,MYLK,NEDD9,PFN1,PIK3R3,PIK3R5,PLCG2,RAC2,RHOC,RHOG,R HOH,RHOU,RND1,TSPAN1,TSPAN7,VASP,WAS,WIPF1                                                                                                                                                                                                                                                                   |
| <b>LPS/IL-1 Mediated Inhibition of RXR Function</b>         | 5.03 | 2.2936<br>58555 | 0.205 | ABCB1,ABCC3,ABCC4,ABCG1,ACSL1,ALDH1A2,ALDH2,ALDH6A1,ALD H7A1,ALDH9A1,APOC1,CAT,CD14,CHST11,CYP2C8,FABP4,FABP5,F MO2,GSTM1,GSTM5,HMGCS2,HS3ST2,IL18,IL18RAP,IL1B,IL1R1,IL1R 2,IL1RL1,IL1RN,IL33,IL4I1,JUN,LBP,LY96,MYD88,NGFR,PAPSS2,PLTP, PPARA,PPARGC1B,SULT1A1,SULT1A2,SULT1B1,TNF,TNFRSF11B,TN FRSF1B                                                                                                                                                                                                                                            |
| <b>Tumoricidal Function of Hepatic Natural Killer Cells</b> | 4.88 | 1.6666<br>66667 | 0.458 | BAX,BID,CASP3,CASP9,FASLG,GZMB,ICAM1,ITGAL,PRF1,SERPINB9, SRGN                                                                                                                                                                                                                                                                                                                                                                                                                                                                                      |
| <b>fMLP Signaling in Neutrophils</b>                        | 4.76 | 3.1378<br>58162 | 0.235 | ACTR3,ARPC1B,ARPC2,ARPC3,ARPC4,ARPC5,ARPC5L,CHP1,FLT3,F PR1,FPR2,FPR3,GNAI2,GNB4,GNG2,IRS1,IRS2,ITPR2,KLB,NCF1,NCF 2,NFATC2,NFKBIE,NOX4,PIK3R3,PIK3R5,PLCB2,PLCB4,PRKCB,PRKC Q,WAS                                                                                                                                                                                                                                                                                                                                                                  |
| <b>Role of Hypercytokinemia/hyperchemokinaemia in the</b>   | 4.69 |                 | 0.349 | CCL2,CCL3,CCL4,CCL5,CCR1,CCR5,CXCL10,CXCL8,IL15,IL18,IL1B,IL 1RN,IL33,IL6,TNF                                                                                                                                                                                                                                                                                                                                                                                                                                                                       |

|                                                                                                              |      |                      |       |                                                                                                                                                                                                                                                                                       |
|--------------------------------------------------------------------------------------------------------------|------|----------------------|-------|---------------------------------------------------------------------------------------------------------------------------------------------------------------------------------------------------------------------------------------------------------------------------------------|
| <b>Pathogenesis of Influenza</b>                                                                             |      |                      |       |                                                                                                                                                                                                                                                                                       |
| <b>Remodeling of Epithelial Adherens Junctions</b>                                                           | 4.66 | 2.8284<br>27125      | 0.29  | ACTB,ACTG1,ACTN2,ACTR3,ARPC1B,ARPC2,ARPC3,ARPC4,ARPC5,ARPC5L,CTNNA2,DNM3,HGF,MAPRE1,TUBA1B,TUBA1C,TUBA3C/TUBA3D,TUBA4A,TUBA8,TUBB3                                                                                                                                                    |
| <b>RhoGDI Signaling</b>                                                                                      | 4.55 | -<br>3.7717<br>11343 | 0.211 | ACTB,ACTG1,ACTR3,ARHGAP6,ARHGAP9,ARHGDI,ARHGEF19,ARHGEF2,ARHGEF3,ARPC1B,ARPC2,ARPC3,ARPC4,ARPC5,ARPC5L,CD44,CDH23,CDH24,CDH3,CFL1,ESR2,GNA15,GNAI2,GNB4,GNG2,GRIP1,ITGA2,ITGA4,ITGA5,MSN,MYL12A,MYL4,RAC2,RHOC,RHOG,RHOH,RHOU,RND1                                                    |
| <b>Antioxidant Action of Vitamin C</b>                                                                       | 4.52 | -<br>2.2360<br>67977 | 0.243 | CSF2RB,GLRX,IKBKE,MAPK10,NFKBIE,NXN,PAFAH1B3,PLA2G16,PLA2G2A,PLA2G2D,PLA2G7,PLB1,PLCB2,PLCB4,PLCD4,PLCG2,PLD1,PLD2,PLD4,PLD6,RARRES3,SLC2A3,SLC2A4,SLC2A5,TNF,TXN,TXNRD1                                                                                                              |
| <b>Toll-like Receptor Signaling</b>                                                                          | 4.52 | 1.5                  | 0.276 | CD14,IL18,IL1B,IL1RL1,IL1RN,IL33,IRAK2,JUN,LBP,LY96,MAP4K4,MYD88,PPARA,TICAM2,TIRAP,TLR10,TLR2,TLR8,TNF,TNFAIP3,TRAF4                                                                                                                                                                 |
| <b>IL-4 Signaling</b>                                                                                        | 4.52 |                      | 0.253 | AKT2,FLT3,HLA-A,HLA-B,HLA-DMA,HLA-DMB,HLA-DOA,HLA-DQA1,HLA-DQB1,HLA-DRA,HLA-DRB1,HLA-DRB5,IL2RG,IL4R,INPP5D,INPP5J,IRS1,IRS2,JAK3,KLB,NFATC2,PIK3R3,PIK3R5,PTPN6,SYNJ2                                                                                                                |
| <b>Clathrin-mediated Endocytosis Signaling</b>                                                               | 4.47 |                      | 0.202 | ACTB,ACTG1,ACTR3,ALB,AP1M2,AP1S2,AP2S1,APOC1,APOL1,ARPC1B,ARPC2,ARPC3,ARPC4,ARPC5,ARPC5L,ARRB2,CHP1,CLU,CSNK2A2,DAB2,DNM3,F2R,FGF10,FGF11,FGF7,FLT3,IRS1,IRS2,ITGA5,ITGB2,ITGB4,KLB,LYZ,MYO1E,PDGFA,PIK3R3,PIK3R5,S100A8,SERPINA1,TF,TFRC,VEGFC                                       |
| <b>Differential Regulation of Cytokine Production in Macrophages and T Helper Cells by IL-17A and IL-17F</b> | 4.46 |                      | 0.5   | CCL2,CCL3,CCL4,CCL5,CSF3,CXCL1,IL1B,IL6,TNF                                                                                                                                                                                                                                           |
| <b>Caveolar-mediated Endocytosis Signaling</b>                                                               | 4.46 |                      | 0.282 | ACTB,ACTG1,ALB,B2M,CD48,COPG2,FLOT1,HLA-A,HLA-B,HLA-C,INSR,ITGA2,ITGA4,ITGA5,ITGA8,ITGAD,ITGAL,ITGAX,ITGB2,ITGB4                                                                                                                                                                      |
| <b>Regulation of Actin-based Motility by Rho</b>                                                             | 4.45 | 4.2640<br>14327      | 0.255 | ACTB,ACTR3,ARPC1B,ARPC2,ARPC3,ARPC4,ARPC5,ARPC5L,CFL1,ITGA2,ITGA4,ITGA5,MYL12A,MYL4,MYLK,PFN1,RAC2,RHOC,RHOG,RHOH,RHOU,RND1,WAS,WIPF1                                                                                                                                                 |
| <b>Superpathway of Inositol Phosphate Compounds</b>                                                          | 4.24 | 3.2024<br>69977      | 0.192 | ALPL,CA3,CD19,CD28,CD86,CDC25B,DUSP2,DUSP5,EYA4,FLT3,HACD2,ICOS,INPP5D,INPP5J,IRS1,IRS2,ITPKC,KLB,LCK,MTMR8,PHOSPHO1,PIK3AP1,PIK3R3,PIK3R5,PIP4K2A,PLCB2,PLCB4,PLCD4,PLCG2,PLD4,PPFIA3,PPP1R14B,PPP1R1B,PPP2R5A,PTPN22,PTPN6,PTPN7,PTPRC,PTPRF,PTPRJ,RAC2,RHOG,SOCS3,SYNJ2,TRAT1,VAV1 |
| <b>Phospholipase C Signaling</b>                                                                             | 4.1  | 5.2399<br>56379      | 0.187 | ADCY6,ARHGEF19,ARHGEF2,ARHGEF3,BLNK,BTK,CD247,CD3D,CD3E,CD79A,CD79B,CHP1,FCER1G,FCGR2A,GNB4,GNG2,GRAP2,ITGA2,ITGA4,ITGA5,ITK,ITPR2,LCK,LCP2,LYN,MEF2C,MYL12A,MYL4,NFATC2,PLA2G2A,PLA2G2D,PLCB2,PLCB4,PLCD4,PLCG2,PLD1,PLD2,PLD4,PLD6,PRKCB,PRKCQ,RAC2,RHOC,RHOG,RHOH,RHOU,RND1,SYK    |
| <b>Pancreatic Adenocarcinoma Signaling</b>                                                                   | 4.04 | 1.2792<br>04298      | 0.226 | AKT2,BIRC5,BRCA2,CASP9,CCND1,CDK2,CDKN1A,CDKN2A,E2F3,FLT3,HBEGF,IRS1,IRS2,JAK3,KLB,MAPK10,MMP9,PIK3R3,PIK3R5,PLD1,PLD2,PLD4,PLD6,RAD51,TGFA,TGFB1,TGFBR2,VEGFC                                                                                                                        |
| <b>Gαq Signaling</b>                                                                                         | 3.85 | 1.8257<br>41858      | 0.202 | AKT2,BTK,CHP1,FLT3,GNA15,GNB4,GNG2,IKBKE,IRS1,IRS2,ITPR2,KLB,NFATC2,NFKBIE,PIK3R3,PIK3R5,PLCB2,PLCB4,PLCG2,PLD1,PLD2,PLD4,PLD6,PRKCB,PRKCQ,PTK2B,RAC2,RGS16,RGS18,RGS2,RHOC,RHOG,RHOH,RHOU,RND1                                                                                       |
| <b>Actin Nucleation by ARP-WASP Complex</b>                                                                  | 3.85 | 4                    | 0.264 | ACTR3,ARPC1B,ARPC2,ARPC3,ARPC4,ARPC5,ARPC5L,ITGA2,ITGA4,ITGA5,RAC2,RHOC,RHOG,RHOH,RHOU,RND1,VASP,WAS,WIPF1                                                                                                                                                                            |
| <b>Sphingosine-1-phosphate Signaling</b>                                                                     | 3.82 | 1.5689<br>29081      | 0.216 | ADCY6,AKT2,CASP1,CASP3,CASP4,CASP5,CASP9,FLT3,GNAI2,IRS1,IRS2,KLB,PDGFA,PIK3R3,PIK3R5,PLCB2,PLCB4,PLCD4,PLCG2,PTK2B,RAC2,RHOC,RHOG,RHOH,RHOU,RND1,S1PR1,S1PR5,SPHK1                                                                                                                   |

|                                                            |      |                      |       |                                                                                                                                                                                                                                                                                                                                                                                               |
|------------------------------------------------------------|------|----------------------|-------|-----------------------------------------------------------------------------------------------------------------------------------------------------------------------------------------------------------------------------------------------------------------------------------------------------------------------------------------------------------------------------------------------|
| <b>Role of Tissue Factor in Cancer</b>                     | 3.76 |                      | 0.215 | AKT2,ARRB2,BLK,CASP3,CCN1,CFL1,CTGF,CXCL1,CXCL8,F2RL1,FG R,FLT3,GNA15,HBEGF,HCK,IL1B,IRS1,IRS2,KLB,LCK,LYN,PDIA2,PIK3 R3,PIK3R5,PLAUR,PTK2B,RPS6KA1,RPS6KA6,VEGFC                                                                                                                                                                                                                             |
| <b>Fc Epsilon RI Signaling</b>                             | 3.67 | 2.2                  | 0.215 | AKT2,BTK,FCER1A,FCER1G,FLT3,GRAP2,INPP5D,INPP5J,IRS1,IRS2, KLB,LCP2,LYN,MAPK10,PIK3R3,PIK3R5,PLA2G2A,PLA2G2D,PLCG2,P RKCB,PRKCQ,RAC2,SYK,SYNJ2,TNF,VAV1,VAV2,VAV3                                                                                                                                                                                                                             |
| <b>ILK Signaling</b>                                       | 3.62 | 2.2630<br>09527      | 0.19  | ACTB,ACTG1,ACTN2,AKT2,BMP2,CASP3,CCND1,CFL1,FBLIM1,FERM T2,FLT3,HIF1A,IRS1,IRS2,ITGB2,ITGB4,JUN,KLB,LEF1,MAPK10,MMP9 ,MYC,MYH7B,MYL4,PIK3R3,PIK3R5,PPM1J,PPP1R14B,PPP2R5A,RAC 2,RHOC,RHOG,RHOH,RHOU,RND1,SNAI1,TMSB10/TMSB4X,TNF,VEG FC                                                                                                                                                       |
| <b>Reelin Signaling in Neurons</b>                         | 3.54 |                      | 0.234 | ARHGEF2,ARHGEF3,BLK,DAB1,FGR,FLT3,HCK,IRS1,IRS2,ITGA2,ITG A4,ITGA5,ITGAL,ITGB2,KLB,LCK,LYN,MAP4K1,MAPK10,PAFAH1B3,PI K3R3,PIK3R5                                                                                                                                                                                                                                                              |
| <b>Complement System</b>                                   | 3.52 | -<br>0.3779<br>64473 | 0.324 | C1QA,C1QB,C3AR1,C5,C5AR1,CD59,CFI,CR1,CR2,ITGAX,ITGB2,MAS P2                                                                                                                                                                                                                                                                                                                                  |
| <b>Epithelial Adherens Junction Signaling</b>              | 3.49 |                      | 0.203 | ACTB,ACTG1,ACTN2,ACTR3,ACVR2B,AKT2,ARPC1B,ARPC2,ARPC3, ARPC4,ARPC5,ARPC5L,CTNNA2,HGF,LEF1,MAGI2,MYH7B,MYL4,NEC TIN3,NOTCH2,SNAI1,TCF7,TGFBR2,TUBA1B,TUBA1C,TUBA3C/TUBA3 D,TUBA4A,TUBA8,TUBB3,VAV2,WAS                                                                                                                                                                                         |
| <b>Phospholipases</b>                                      | 3.46 | 2.1828<br>20625      | 0.262 | LIPG,PAFAH1B3,PLA1A,PLA2G16,PLA2G2A,PLA2G2D,PLA2G7,PLB1, PLCB2,PLCB4,PLCD4,PLCG2,PLD1,PLD2,PLD4,PLD6,RARRES3                                                                                                                                                                                                                                                                                  |
| <b>Virus Entry via Endocytic Pathways</b>                  | 3.43 |                      | 0.215 | ACTB,ACTG1,AP1M2,AP1S2,AP2S1,B2M,FLT3,HLA-A,HLA-B,HLA- C,IRS1,IRS2,ITGA2,ITGA4,ITGA5,ITGAL,ITGB2,ITGB4,KLB,PIK3R3,PIK 3R5,PLCG2,PRKCB,PRKCQ,RAC2,TFRC                                                                                                                                                                                                                                         |
| <b>Systemic Lupus Erythematosus Signaling</b>              | 3.38 |                      | 0.18  | AKT2,C5,CD22,CD247,CD28,CD3D,CD3E,CD72,CD79A,CD79B,CD86,C REM,FCER1G,FCGR1A,FCGR1B,FCGR2A,FCGR3A/FCGR3B,FLT3,HL A-A,HLA-B,HLA-C,HLA- E,IGHM,IL18,IL1B,IL1RN,IL33,IL6,INPP5D,IRS1,IRS2,JUN,KLB,LCK,LYN ,NFATC2,PIK3R3,PIK3R5,PLCG2,PTPN6,PTPRC,TNF,TNFSF13B                                                                                                                                    |
| <b>Salvage Pathways of Pyrimidine Deoxyribonucleotides</b> | 3.24 | 2.2360<br>67977      | 0.625 | APOBEC3A,APOBEC3B,APOBEC3G,CDA,TK1                                                                                                                                                                                                                                                                                                                                                            |
| <b>Eicosanoid Signaling</b>                                | 3.21 | 2.5298<br>22128      | 0.25  | ALOX15B,ALOX5,ALOX5AP,CYSLTR1,DPEP2,FPR2,HPGDS,PAFAH1B 3,PLA2G16,PLA2G2A,PLA2G2D,PLA2G7,PLB1,PTGFR,PTGIR,RARRE S3,TBXAS1                                                                                                                                                                                                                                                                      |
| <b>Molecular Mechanisms of Cancer</b>                      | 3.16 |                      | 0.159 | ADCY6,AKT2,ARHGEF19,ARHGEF2,ARHGEF3,BAX,BID,BIRC3,BMP2, BMP3,CASP3,CASP9,CCND1,CCNE2,CDC25B,CDK1,CDK2,CDK20,CD KN1A,CDKN2A,CDKN2C,CTNNA2,E2F3,FANCD2,FASLG,FLT3,FZD7,F ZD9,GNA15,GNAI2,HIF1A,IRS1,IRS2,ITGA2,ITGA4,ITGA5,JAK3,JUN,KL B,LEF1,MAP3K5,MAPK10,MYC,NFKBIE,PIK3R3,PIK3R5,PLCB2,PLCB4, PMAIP1,PRKCB,PRKCQ,PTCH1,RAC2,RASGRP1,RHOC,RHOG,RHOH, RHOU,RND1,SMAD6,TGFB1,TGFBR2,WNT2B,WNT3 |
| <b>Ethanol Degradation IV</b>                              | 3.14 | -<br>1.6666<br>66667 | 0.36  | ACSL1,ACSS2,ACSS3,ALDH1A2,ALDH2,ALDH7A1,ALDH9A1,CAT,GPX 7                                                                                                                                                                                                                                                                                                                                     |
| <b>Coagulation System</b>                                  | 3.14 | 0.3015<br>11345      | 0.314 | A2M,F13A1,F2R,F5,PLAT,PLAUR,PROS1,SERPINA1,SERPINE1,THBD, VWF                                                                                                                                                                                                                                                                                                                                 |
| <b>CCR5 Signaling in Macrophages</b>                       | 3.12 | 2.1105<br>79412      | 0.223 | CACNA2D3,CACNG8,CCL3,CCL4,CCL5,CCR5,CD247,CD3D,CD3E,CD 4,FASLG,FCER1G,GNAI2,GNB4,GN2,JUN,MAPK10,PLCG2,PRKCB,P RKCB,PTK2B                                                                                                                                                                                                                                                                      |
| <b>Rac Signaling</b>                                       | 3.1  | 3.4                  | 0.205 | ACTR3,ARPC1B,ARPC2,ARPC3,ARPC4,ARPC5,ARPC5L,CD44,CFL1,C YFIP2,FLT3,IQGAP3,IRS1,IRS2,ITGA2,ITGA4,ITGA5,JUN,KLB,NCF2,N OX4,PIK3R3,PIK3R5,PLD1,PTK2B,TIAM1                                                                                                                                                                                                                                       |
| <b>IL-12 Signaling and Production in Macrophages</b>       | 3.06 |                      | 0.196 | AKT2,ALB,APOC1,APOL1,CLU,FLT3,IKBKE,IL12RB1,IL18,IRF1,IRF8,IR S1,IRS2,JUN,KLB,LYZ,MAP3K8,MAPK10,MYD88,PIK3R3,PIK3R5,PRKC B,PRKCQ,S100A8,SERPINA1,SPI1,TGFB1,TLR2,TNF                                                                                                                                                                                                                          |
| <b>p70S6K Signaling</b>                                    | 2.97 | 2.3533<br>93622      | 0.196 | AKT2,BTK,CD19,CD79A,CD79B,F2R,F2RL1,FLT3,GNAI2,IL2RG,IL4R,IR S1,IRS2,KLB,LYN,PIK3R3,PIK3R5,PLCB2,PLCB4,PLCD4,PLCG2,PLD1, PPM1J,PPP2R5A,PRKCB,PRKCQ,SYK,YWHAH                                                                                                                                                                                                                                  |
| <b>Acute Phase Response Signaling</b>                      | 2.92 | 3.2716<br>51525      | 0.184 | A2M,AKT2,ALB,C5,CP,CRABP1,FTL,IKBKE,IL18,IL1B,IL1R1,IL1RN,IL33 ,IL6,JUN,LBP,MAP3K5,MYD88,NFKBIE,NGFR,OSM,OSMR,PIK3R3,RBP 5,SAA1,SERPINA1,SERPINE1,SOCS3,TF,TNF,TNFRSF11B,TNFRSF1B ,VWF                                                                                                                                                                                                        |

|                                                                                                           |      |                      |       |                                                                                                                                                                                                                         |
|-----------------------------------------------------------------------------------------------------------|------|----------------------|-------|-------------------------------------------------------------------------------------------------------------------------------------------------------------------------------------------------------------------------|
| <b>Death Receptor Signaling</b>                                                                           | 2.91 | 2.2360<br>67977      | 0.22  | ACTB,ACTG1,ARHGDI1,BID,BIRC3,CASP3,CASP9,FASLG,IKBKE,MAP3K5,MAP4K4,NFKBIE,PARP12,PARP14,PARP16,TNF,TNFRSF10A,TNFRSF10B,TNFRSF1B,TNFRSF15                                                                                |
| <b>IL-23 Signaling Pathway</b>                                                                            | 2.9  | 0                    | 0.25  | AKT2,FLT3,FOXP3,HIF1A,IL12RB1,IL1B,IRS1,IRS2,KLB,PIK3R3,PIK3R5,RORC,RUNX1,SOCS3,TNF                                                                                                                                     |
| <b>Induction of Apoptosis by HIV1</b>                                                                     | 2.82 | 1.2909<br>94449      | 0.246 | BAX,BID,BIRC3,CASP3,CASP9,CXCR4,FASLG,IKBKE,MAP3K5,MAPK10,NFKBIE,NGFR,TNF,TNFRSF11B,TNFRSF1B                                                                                                                            |
| <b>Apoptosis Signaling</b>                                                                                | 2.81 | -<br>0.4472<br>13595 | 0.212 | BAX,BCL2A1,BID,BIRC3,CAPN6,CAPN8,CAPN9,CASP3,CASP9,CDK1,FASLG,IKBKE,MAP3K5,MAP4K4,MCL1,NFKBIE,PLCG2,PRKCQ,RPS6KA1,TNF,TNFRSF1B                                                                                          |
| <b>Endothelin-1 Signaling</b>                                                                             | 2.78 | 2.7439<br>77362      | 0.176 | ADCY6,CASP1,CASP3,CASP4,CASP5,CASP9,ECE2,FLT3,GNA15,GNAI2,IRS1,IRS2,ITPR2,JUN,KLB,MAPK10,MYC,PAFAH1B3,PIK3R3,PIK3R5,PLA2G16,PLA2G2A,PLA2G2D,PLA2G7,PLB1,PLCB2,PLCB4,PLCD4,PLCG2,PLD1,PLD2,PLD4,PLD6,PRKCB,PRKCQ,RARRES3 |
| <b>Human Embryonic Stem Cell Pluripotency</b>                                                             | 2.78 |                      | 0.19  | AKT2,BDNF,BMP2,BMP3,FGFRL1,FLT3,FZD7,FZD9,IRS1,IRS2,KLB,LEF1,NODAL,NTRK1,NTRK3,PDGFA,PIK3R3,PIK3R5,POU5F1,S1PR1,S1PR5,SMAD6,SPHK1,TCF7,TGFB1,TGFB2,WNT2B,WNT3                                                           |
| <b>IL-7 Signaling Pathway</b>                                                                             | 2.78 | 1.6059<br>10137      | 0.215 | AKT2,BAX,CCND1,CDK2,FLT3,HGF,IGHM,IL2RG,IL7R,IRS1,IRS2,JAK3,JUN,KLB,LYN,MCL1,MYC,PAX5,PIK3R3,PIK3R5                                                                                                                     |
| <b>3-phosphoinositide Biosynthesis</b>                                                                    | 2.74 | 2.6111<br>64839      | 0.176 | ALPL,CA3,CD19,CD28,CD86,CDC25B,DUSP2,DUSP5,EYA4,FLT3,HACD2,ICOS,IRS1,IRS2,KLB,LCK,MTMR8,PHOSPHO1,PIK3AP1,PIK3R3,PIK3R5,PPFIA3,PPP1R14B,PPP1R1B,PPP2R5A,PTPN22,PTPN6,PTPN7,PTPRC,PTPRF,PTPRJ,RAC2,RHOG,SOCS3,TRAT1,VAV1  |
| <b>Differential Regulation of Cytokine Production in Intestinal Epithelial Cells by IL-17A and IL-17F</b> | 2.73 |                      | 0.348 | CCL2,CCL3,CCL4,CCL5,CSF3,CXCL1,IL1B,TNF                                                                                                                                                                                 |
| <b>14-3-3-mediated Signaling</b>                                                                          | 2.69 | 0.6882<br>47202      | 0.19  | AKT2,BAX,FLT3,IRS1,IRS2,JUN,KLB,MAP3K5,MAPK10,PIK3R3,PIK3R5,PLCB2,PLCB4,PLCD4,PLCG2,PRKCB,PRKCQ,RPS6KA1,SNCA,TNF,TUBA1B,TUBA1C,TUBA3C/TUBA3D,TUBA4A,TUBA8,TUBB3,YWHAH                                                   |
| <b>Inhibition of Angiogenesis by TSP1</b>                                                                 | 2.66 | 0.7071<br>06781      | 0.294 | AKT2,CASP3,JUN,MAPK10,MMP9,SDC1,SDC2,TGFB1,TGFB2,THBS1                                                                                                                                                                  |
| <b>Glioma Invasiveness Signaling</b>                                                                      | 2.58 | 2                    | 0.211 | CD44,F2R,FLT3,HMMR,IRS1,IRS2,KLB,MMP9,PIK3R3,PIK3R5,PLAUR,RAC2,RHOC,RHOG,RHOH,RHOU,RND1,TIMP1,VTN                                                                                                                       |
| <b>HGF Signaling</b>                                                                                      | 2.56 | 1.2792<br>04298      | 0.194 | AKT2,CCND1,CDK2,CDKN1A,CDKN2A,ETS2,FLT3,HGF,IL6,IRS1,IRS2,ITGA2,ITGA4,ITGA5,JUN,KLB,MAP3K5,MAP3K8,MAPK10,PIK3R3,PIK3R5,PLCG2,PRKCB,PRKCQ                                                                                |
| <b>p38 MAPK Signaling</b>                                                                                 | 2.52 | 3.5777<br>08764      | 0.195 | CDC25B,FASLG,IL18,IL18RAP,IL1B,IL1R1,IL1R2,IL1RL1,IL1RN,IL33,IRAK2,MAP3K5,MAP4K1,MEF2C,MYC,PLA2G2A,PLA2G2D,RPS6KA1,RP S6KA6,TGFB1,TGFB2,TNF,TNFRSF1B                                                                    |
| <b>NF-κB Activation by Viruses</b>                                                                        | 2.5  | 2.3570<br>22604      | 0.204 | AKT2,CCR5,CD4,CR2,FLT3,IKBKE,IRS1,IRS2,ITGA2,ITGA4,ITGA5,ITGAL,ITGB2,KLB,LCK,NFKBIE,PIK3R3,PIK3R5,PRKCB,PRKCQ                                                                                                           |
| <b>PTEN Signaling</b>                                                                                     | 2.47 | -<br>0.2085<br>14414 | 0.19  | AKT2,CASP3,CASP9,CCND1,CDKN1A,CSNK2A2,FASLG,IKBKE,INPP5D,INPP5J,INSR,ITGA2,ITGA4,ITGA5,MAGI2,NGFR,NTRK1,NTRK3,PIK3R3,PIK3R5,RAC2,SYNJ2,TGFB2,YWHAH                                                                      |
| <b>IL-17A Signaling in Gastric Cells</b>                                                                  | 2.47 | 1.3416<br>40786      | 0.32  | CCL5,CXCL1,CXCL10,CXCL11,CXCL8,JUN,MAPK10,TNF                                                                                                                                                                           |
| <b>p53 Signaling</b>                                                                                      | 2.43 | 1.4142<br>13562      | 0.195 | AKT2,BAX,BIRC5,CCND1,CDK2,CDKN1A,CDKN2A,DRAM1,FLT3,HIF1A,IRS1,IRS2,JUN,KLB,PIK3R3,PIK3R5,PLAGL1,PMAIP1,SERPINE2,THBS1,TNFRSF10A,TNFRSF10B                                                                               |
| <b>Phagosome Maturation</b>                                                                               | 2.43 |                      | 0.182 | ATP6V0B,ATP6V0D1,ATP6V1B2,ATP6V1C2,B2M,CTSB,CTSS,CTSV,CTSW,CTSZ,DYNC111,DYNC2H1,HLA-A,HLA-B,HLA-C,HLA-DRA,HLA-DRB1,HLA-DRB5,NCF2,NOX4,TAP1,TUBA1B,TUBA1C,TUBA3C/TUBA3D,TUBA4A,TUBA8,TUBB3                               |
| <b>Docosahexaenoic Acid</b>                                                                               | 2.43 |                      | 0.241 | AKT2,BAX,BCL2A1,BID,CASP3,CASP9,FLT3,IL1B,IRS1,IRS2,KLB,PIK3R3,PIK3R5                                                                                                                                                   |

|                                                                  |      |                      |       |                                                                                                                                                                                                                               |
|------------------------------------------------------------------|------|----------------------|-------|-------------------------------------------------------------------------------------------------------------------------------------------------------------------------------------------------------------------------------|
| <b>(DHA) Signaling</b>                                           |      |                      |       |                                                                                                                                                                                                                               |
| <b>IL-15 Production</b>                                          | 2.38 |                      | 0.19  | ALK,BLK,BMX,BTK,EPHA4,FGR,HCK,IL15,IL6,INSR,IRF1,ITK,JAK3,LCK,LYN,MATK,MERTK,NTRK1,NTRK3,PTK2B,ROR2,STYK1,SYK                                                                                                                 |
| <b>Estrogen-mediated S-phase Entry</b>                           | 2.36 | 1.4142<br>13562      | 0.308 | CCND1,CCNE2,CDK1,CDK2,CDKN1A,E2F3,ESR2,MYC                                                                                                                                                                                    |
| <b>Hematopoiesis from Pluripotent Stem Cells</b>                 | 2.35 |                      | 0.245 | CD247,CD3D,CD3E,CD4,CD8A,CD8B,CSF3,CXCL8,FCER1G,IGHD,IGHM,IL6                                                                                                                                                                 |
| <b>Acetate Conversion to Acetyl-CoA</b>                          | 2.35 |                      | 0.75  | ACSL1,ACSS2,ACSS3                                                                                                                                                                                                             |
| <b>Aryl Hydrocarbon Receptor Signaling</b>                       | 2.34 | 0.7276<br>06875      | 0.182 | AHR,ALDH1A2,ALDH2,ALDH6A1,ALDH7A1,ALDH9A1,BAX,CCND1,CCNE2,CDK2,CDKN1A,CDKN2A,CYP1B1,ESR2,FASLG,GSTM1,GSTM5,IL1B,IL6,JUN,MYC,NFIC,NFIX,NQO1,TGFB1,TNF                                                                          |
| <b>Granzyme B Signaling</b>                                      | 2.34 | 1.3416<br>40786      | 0.375 | BID,CASP3,CASP9,GZMB,LMNB1,PRF1                                                                                                                                                                                               |
| <b>Parkinson's Signaling</b>                                     | 2.34 |                      | 0.375 | CASP3,CASP9,GPR37,SNCA,SNCAIP,UCHL1                                                                                                                                                                                           |
| <b>Vitamin-C Transport</b>                                       | 2.34 |                      | 0.375 | GLRX,NXN,SLC2A3,SLC2A4,TXN,TXNRD1                                                                                                                                                                                             |
| <b>Oxidative Ethanol Degradation III</b>                         | 2.33 | -<br>1.8898<br>22365 | 0.333 | ACSL1,ACSS2,ACSS3,ALDH1A2,ALDH2,ALDH7A1,ALDH9A1                                                                                                                                                                               |
| <b>Apelin Cardiomyocyte Signaling Pathway</b>                    | 2.33 | 0.6882<br>47202      | 0.191 | AKT2,CAT,FLT3,GNAI2,HIF1A,IRS1,IRS2,KLB,MAPK10,MYL12A,MYL4,MYLK,PIK3R3,PIK3R5,PLCB2,PLCB4,PLCD4,PLCG2,PRKCB,PRKCQ,SLC8A1,TGFB1                                                                                                |
| <b>RhoA Signaling</b>                                            | 2.29 | 2.9848<br>10029      | 0.187 | ACTB,ACTG1,ACTR3,ANLN,ARHGAP6,ARHGAP9,ARPC1B,ARPC2,ARPC3,ARPC4,ARPC5,ARPC5L,CDC42EP3,CFL1,CIT,LPAR2,MSN,MYL12A,MYL4,MYLK,PFN1,PLD1,PTK2B                                                                                      |
| <b>Germ Cell-Sertoli Cell Junction Signaling</b>                 | 2.29 |                      | 0.17  | A2M,ACTB,ACTG1,ACTN2,CFL1,CTNNA2,FLT3,IRS1,IRS2,ITGA2,KLB,MAP3K5,MAP3K8,MAPK10,NECTIN3,PIK3R3,PIK3R5,RAC2,RHOC,RHOG,RHOH,RHOU,RND1,TGFB1,TGFBR2,TNF,TUBA1B,TUBA1C,TUBA3C/TUBA3D,TUBA4A,TUBA8,TUBB3                            |
| <b>Endocannabinoid Cancer Inhibition Pathway</b>                 | 2.28 | 1                    | 0.176 | ADCY6,AKT2,ATF3,CASP1,CASP3,CASP4,CASP5,CASP9,CCND1,CCNE2,CDKN1A,FLT3,GNAI2,GPR55,HIF1A,IRS1,IRS2,KLB,LEF1,MYC,PIK3R3,PIK3R5,SPTLC2,TCF7,TRPV1,TWIST1,TWIST2,VEGFC                                                            |
| <b>Gα12/13 Signaling</b>                                         | 2.22 | 1.6329<br>93162      | 0.178 | AKT2,BTK,CDH23,CDH24,CDH3,F2R,F2RL1,FLT3,IKBKE,IRS1,IRS2,JUN,KLB,LPAR2,MAP3K5,MAPK10,MEF2C,MYL12A,MYL4,NFKBIE,PIK3R3,PIK3R5,PTK2B,VAV1,VAV2,VAV3                                                                              |
| <b>CXCR4 Signaling</b>                                           | 2.21 | 3                    | 0.169 | ADCY6,AKT2,CD4,CXCR4,ELMO1,FLT3,GNA15,GNAI2,GNB4,GNG2,IRS1,IRS2,ITPR2,JUN,KLB,LYN,MAPK10,MYL12A,MYL4,PIK3R3,PIK3R5,PLCB2,PLCB4,PRKCB,PRKCQ,RAC2,RHOC,RHOG,RHOH,RHOU,RND1                                                      |
| <b>Apelin Cardiac Fibroblast Signaling Pathway</b>               | 2.21 | -<br>2.6457<br>51311 | 0.318 | AKT2,ANGPT2,CTGF,IL6,SERPINE1,SPHK1,TGFB1                                                                                                                                                                                     |
| <b>PPAR Signaling</b>                                            | 2.2  | -<br>4.0249<br>22359 | 0.192 | CITED2,IKBKE,IL18,IL18RAP,IL1B,IL1R1,IL1R2,IL1RL1,IL1RN,IL33,INSR,JUN,MAP4K4,NFKBIE,NGFR,PDGFA,PPARA,TNF,TNFRSF11B,TNFRSF1B                                                                                                   |
| <b>Airway Pathology in Chronic Obstructive Pulmonary Disease</b> | 2.2  |                      | 0.5   | CXCL3,CXCL8,MMP9,TNF                                                                                                                                                                                                          |
| <b>Colorectal Cancer Metastasis Signaling</b>                    | 2.19 | 2.0579<br>83022      | 0.157 | ADCY6,AKT2,BAX,BIRC5,CASP3,CASP9,CCND1,FLT3,FZD7,FZD9,GNB4,GNG2,GRK3,IL6,IRS1,IRS2,JAK3,JUN,KLB,LEF1,MAPK10,MMP25,MMP9,MYC,PIK3R3,PIK3R5,RAC2,RHOC,RHOG,RHOH,RHOU,RND1,TCF7,TGFB1,TGFBR2,TLR10,TLR2,TLR8,TNF,VEGFC,WNT2B,WNT3 |
| <b>Cholecystokinin/Gastrin-</b>                                  | 2.15 | 4.0249<br>22359      | 0.185 | CREM,EPHA4,IL18,IL1B,IL1RN,IL33,ITPR2,JUN,MAPK10,MEF2C,PLCB2,PLCB4,PRKCB,PRKCQ,PTK2B,RAC2,RHOC,RHOG,RHOH,RHOU,RND1,TNF                                                                                                        |

|                                                                    |      |                      |       |                                                                                                                                                                                                           |
|--------------------------------------------------------------------|------|----------------------|-------|-----------------------------------------------------------------------------------------------------------------------------------------------------------------------------------------------------------|
| <b>mediated Signaling</b>                                          |      |                      |       |                                                                                                                                                                                                           |
| <b>FAT10 Cancer Signaling Pathway</b>                              | 2.11 | 2.1105<br>79412      | 0.239 | ACVR2B,AKT2,CXCR4,IKBKE,IL6,NGFR,TGFB1,TGFBR2,TNF,TNFRSF11B,TNFRSF1B                                                                                                                                      |
| <b>Ethanol Degradation II</b>                                      | 2.11 | -<br>2.3333<br>33333 | 0.265 | ACSL1,ACSS2,ACSS3,ADH1B,ADHFE1,ALDH1A2,ALDH2,ALDH7A1,ALDH9A1                                                                                                                                              |
| <b>Sertoli Cell-Sertoli Cell Junction Signaling</b>                | 2.1  |                      | 0.167 | A2M,ACTB,ACTG1,ACTN2,AKT2,CLDN10,CLDN2,CLDN4,CLDN9,CTNNA2,ITGA2,ITGA4,ITGA5,JAM2,JUN,MAGI2,MAP3K5,MAP3K8,MAPK10,NECTIN3,SPTA1,SPTB,TJP2,TNF,TUBA1B,TUBA1C,TUBA3C/TUBA3D,TUBA4A,TUBA8,TUBB3,WAS            |
| <b>Sperm Motility</b>                                              | 2.07 | 2.1828<br>20625      | 0.16  | ALK,BLK,BMX,BTK,EPHA4,FGR,HCK,INSR,ITK,ITPR2,JAK3,LCK,LYN,MATK,MERTK,NPR1,NTRK1,NTRK3,PAFAH1B3,PDE1B,PLA2G16,PLA2G2A,PLA2G2D,PLA2G7,PLB1,PLCB2,PLCB4,PLCD4,PLCG2,PRKCB,PRKCC,PTK2B,RARRES3,ROR2,STYK1,SYK |
| <b>Role of IL-17A in Psoriasis</b>                                 | 2.07 |                      | 0.385 | CXCL1,CXCL3,CXCL8,S100A8,S100A9                                                                                                                                                                           |
| <b>Factors Promoting Cardiogenesis in Vertebrates</b>              | 2.06 |                      | 0.194 | ACVR2B,BMP2,BMP3,CCNE2,CDC6,CDK2,FZD7,FZD9,LEF1,MEF2C,NODAL,NOX4,PRKCB,PRKCC,TCF7,TGFB1,TGFBR2,WNT3                                                                                                       |
| <b>Valine Degradation I</b>                                        | 2.06 | -<br>0.8164<br>96581 | 0.333 | ABAT,ALDH6A1,BCAT1,BCAT2,DBT,SDS                                                                                                                                                                          |
| <b>Glioblastoma Multiforme Signaling</b>                           | 2.05 | 1.1766<br>96811      | 0.167 | AKT2,CCND1,CDK2,CDKN1A,CDKN2A,E2F3,FLT3,FZD7,FZD9,IRS1,IRS2,ITPR2,KLB,LEF1,MYC,PDGFA,PIK3R3,PIK3R5,PLCB2,PLCB4,PLCD4,PLCG2,RAC2,RHOC,RHOG,RHOH,RHOU,RND1,WNT2B,WNT3                                       |
| <b>Wnt/<math>\beta</math>-catenin Signaling</b>                    | 2.04 | -<br>0.8164<br>96581 | 0.168 | ACVR2B,AKT2,AXIN2,BCL9,CCND1,CD44,CDH3,CDKN2A,CSNK2A2,FRZB,FZD7,FZD9,JUN,LEF1,MAP4K1,MYC,POU5F1,PPM1J,PPP2R5A,SFRP2,SFRP4,SOX4,SOX6,TCF7,TGFB1,TGFBR2,TLE4,WNT2B,WNT3                                     |
| <b>IL-9 Signaling</b>                                              | 2.04 | 0.3333<br>33333      | 0.234 | CISH,FLT3,IL2RG,IRS1,IRS2,JAK3,KLB,PIK3R3,PIK3R5,SOCS3,TNF                                                                                                                                                |
| <b>Myc Mediated Apoptosis Signaling</b>                            | 2.02 |                      | 0.2   | AKT2,BAX,BID,CASP3,CASP9,CDKN2A,FASLG,FLT3,IRS1,IRS2,KLB,MAPK10,MYC,PIK3R3,PIK3R5,YWHAH                                                                                                                   |
| <b>Lysine Degradation V</b>                                        | 1.99 |                      | 0.6   | AADAT,ALDH7A1,PIPOX                                                                                                                                                                                       |
| <b>Tetrahydrofolate Salvage from 5,10-methenyltetrahydrofolate</b> | 1.99 |                      | 0.6   | MTHFD1,MTHFD1L,MTHFD2                                                                                                                                                                                     |
| <b>MSP-RON Signaling Pathway</b>                                   | 1.98 |                      | 0.203 | ACTB,ACTG1,CCL2,CCR2,CSF2RB,FLT3,IL3RA,IRS1,IRS2,ITGB2,KLB,PIK3R3,PIK3R5,TLR2,TNF                                                                                                                         |
| <b>Alanine Biosynthesis II</b>                                     | 1.95 |                      | 1     | GPT,GPT2                                                                                                                                                                                                  |
| <b>Alanine Degradation III</b>                                     | 1.95 |                      | 1     | GPT,GPT2                                                                                                                                                                                                  |
| <b>Cysteine Biosynthesis/ Homocysteine Degradation</b>             | 1.95 |                      | 1     | CBS/CBSL,CTH                                                                                                                                                                                              |
| <b>Guanine and Guanosine Salvage I</b>                             | 1.95 |                      | 1     | HPRT1,PNP                                                                                                                                                                                                 |
| <b>Sulfate Activation for Sulfonation</b>                          | 1.95 |                      | 1     | PAPSS1,PAPSS2                                                                                                                                                                                             |
| <b><math>\beta</math>-alanine Degradation I</b>                    | 1.95 |                      | 1     | ABAT,ALDH6A1                                                                                                                                                                                              |
| <b>Tight Junction Signaling</b>                                    | 1.95 |                      | 0.167 | ACTB,ACTG1,AKT2,ARHGEF2,CEBPA,CLDN10,CLDN2,CLDN4,CLDN9,JAM2,JUN,MAGI2,MYH7B,MYL4,MYLK,NECTIN3,NGFR,PPM1J,PPP2R5A,RAB13,TGFB1,TGFBR2,TIAM1,TJP2,TNF,TNFRSF11B,TNFRSF1B,VASP                                |



|                                                                             |      |                      |       |                                                                                                                                                                                                                                                                                               |
|-----------------------------------------------------------------------------|------|----------------------|-------|-----------------------------------------------------------------------------------------------------------------------------------------------------------------------------------------------------------------------------------------------------------------------------------------------|
| <b>DNA damage-induced 14-3-3<math>\sigma</math> Signaling</b>               | 1.94 |                      | 0.316 | AKT2,CCNB1,CCNB2,CCNE2,CDK1,CDK2                                                                                                                                                                                                                                                              |
| <b>GADD45 Signaling</b>                                                     | 1.94 |                      | 0.316 | CCNB1,CCND1,CCNE2,CDK1,CDK2,CDKN1A                                                                                                                                                                                                                                                            |
| <b>Regulation of IL-2 Expression in Activated and Anergic T Lymphocytes</b> | 1.92 |                      | 0.191 | CARD11,CD247,CD28,CD3D,CD3E,CHP1,IKBKE,JUN,MAPK10,NFATC2,NFKBIE,PLCG2,TGFB1,TGFBR2,VAV1,VAV2,VAV3                                                                                                                                                                                             |
| <b>Role of MAPK Signaling in the Pathogenesis of Influenza</b>              | 1.92 |                      | 0.195 | AKT2,BAX,CASP3,CCL2,CCL5,CXCL10,MAP3K5,MAPK10,PAFAH1B3,PLA2G16,PLA2G2A,PLA2G2D,PLA2G7,PLB1,RARRES3,TNF                                                                                                                                                                                        |
| <b>Acute Myeloid Leukemia Signaling</b>                                     | 1.92 | 0.2773<br>50098      | 0.184 | AKT2,CCND1,CEBPA,CSF2RB,CSF3R,EIF4EBP1,FLT3,IDH1,IRS1,IRS2,KLB,LEF1,MYC,PIK3R3,PIK3R5,PIM1,RUNX1,SPI1,TCF7                                                                                                                                                                                    |
| <b>Ephrin A Signaling</b>                                                   | 1.9  |                      | 0.21  | CFL1,EPHA4,EPHA7,FLT3,IRS1,IRS2,KLB,NGFR,PIK3R3,PIK3R5,VAV1,VAV2,VAV3                                                                                                                                                                                                                         |
| <b>Lymphotoxin <math>\beta</math> Receptor Signaling</b>                    | 1.89 | 0.5773<br>50269      | 0.203 | AKT2,CASP3,CASP9,CXCL1,FLT3,IKBKE,IRS1,IRS2,KLB,LTB,PIK3R3,PIK3R5,RELB,TRAF4                                                                                                                                                                                                                  |
| <b>Fc<math>\gamma</math>R1IB Signaling in B Lymphocytes</b>                 | 1.87 | 1.0690<br>44968      | 0.189 | BLNK,BTK,CACNA2D3,CACNG8,CD79A,CD79B,FLT3,INPP5D,IRS1,IRS2,KLB,LYN,MAPK10,PIK3R3,PIK3R5,PLCG2,SYK                                                                                                                                                                                             |
| <b>G Protein Signaling Mediated by Tubby</b>                                | 1.86 |                      | 0.258 | GNB4,GNG2,INSR,LCK,PLCB2,PLCB4,PLCG2,TUB                                                                                                                                                                                                                                                      |
| <b>Th17 Activation Pathway</b>                                              | 1.83 | 2.5                  | 0.187 | AHR,BATF,CCR6,FCER1G,FOXP3,HIF1A,IL12RB1,IL1B,IL1R1,IL6,IRAK2,JAK3,MYD88,NFATC2,RORC,RUNX1,SOCS3                                                                                                                                                                                              |
| <b>Adrenomedullin signaling pathway</b>                                     | 1.83 | 1.8898<br>22365      | 0.157 | ADCY6,AKT2,BAX,CASP3,CTH,FLT3,GNA15,GPR37,HIF1A,IL18,IL1B,IL1RN,IL33,IRS1,IRS2,ITPR2,KCNH2,KCNQ3,KLB,MAPK10,MATK,MYLK,NPR1,PIK3R3,PIK3R5,PLCB2,PLCB4,PLCD4,PLCG2,PTK2B,RAMP3,SMARCC2,TNF                                                                                                      |
| <b>Role of IL-17A in Arthritis</b>                                          | 1.83 |                      | 0.2   | CCL2,CCL5,CXCL1,CXCL3,CXCL8,FLT3,IRS1,IRS2,KLB,MAPK10,NFKBIE,PIK3R3,PIK3R5,RPS6KA1                                                                                                                                                                                                            |
| <b>GM-CSF Signaling</b>                                                     | 1.82 | 1.2909<br>94449      | 0.19  | AKT2,BCL2A1,CCND1,CISH,CSF2RB,FLT3,HCK,IRS1,IRS2,KLB,LYN,PIK3R3,PIK3R5,PIM1,PRKCB,RUNX1                                                                                                                                                                                                       |
| <b>GP6 Signaling Pathway</b>                                                | 1.8  | 1.9639<br>61012      | 0.17  | AKT2,BTK,COL10A1,COL11A1,COL24A1,COL6A6,FCER1G,FLT3,GRAP2,IRS1,IRS2,KLB,LAMA3,LAMC2,LCP2,LYN,PIK3R3,PIK3R5,PLCG2,PRKCB,PRKCQ,RHOG,SYK                                                                                                                                                         |
| <b>VDR/RXR Activation</b>                                                   | 1.78 | 1.1547<br>00538      | 0.192 | CCL5,CD14,CDKN1A,CEBPA,CXCL10,IL1RL1,MXD1,PDGFA,PRKCB,PRKCQ,RUNX2,SERPINB1,SPP1,THBD,VDR                                                                                                                                                                                                      |
| <b>Choline Biosynthesis III</b>                                             | 1.78 | -<br>0.4472<br>13595 | 0.333 | CEPT1,PLD1,PLD2,PLD4,PLD6                                                                                                                                                                                                                                                                     |
| <b>iNOS Signaling</b>                                                       | 1.74 | 2.1213<br>20344      | 0.222 | CD14,IKBKE,IRAK2,IRF1,JAK3,JUN,LBP,LY96,MYD88,NFKBIE                                                                                                                                                                                                                                          |
| <b>Growth Hormone Signaling</b>                                             | 1.73 | 0                    | 0.186 | A2M,CEBPA,FLT3,IRS1,IRS2,KLB,PIK3R3,PIK3R5,PLCG2,PRKCB,PRKCQ,PTPN6,RPS6KA1,RPS6KA6,SLC2A4,SOCS3                                                                                                                                                                                               |
| <b>Chondroitin and Dermatan Biosynthesis</b>                                | 1.72 |                      | 0.5   | CHSY1,CHSY3,CSGALNACT1                                                                                                                                                                                                                                                                        |
| <b>Urea Cycle</b>                                                           | 1.72 |                      | 0.5   | ARG1,ASS1,CPS1                                                                                                                                                                                                                                                                                |
| <b>Glucocorticoid Receptor Signaling</b>                                    | 1.71 |                      | 0.143 | A2M,ACTB,AKT2,ANXA1,AR,CCL2,CCL3,CCL5,CD163,CD247,CD3D,CD3E,CDKN1A,CDKN1C,CEBPA,CHP1,CXCL3,CXCL8,FCGR1A,FLT3,HSPA1L,HSPA6,ICAM1,IKBKE,IL1B,IL1R2,IL1RN,IL6,IRS1,IRS2,JAK3,JUN,KLB,MAPK10,NFATC2,NFKBIE,PBX1,PCK1,PIK3R3,PIK3R5,POU2F2,SELE,SERPINE1,SGK1,SMARCC2,TAF13,TGFB1,TGFBR2,TNF,YWHAH |
| <b>IL-15 Signaling</b>                                                      | 1.69 |                      | 0.184 | AKT2,CXCL8,FASLG,FLT3,IL15,IL2RG,IL6,IRS1,IRS2,JAK3,KLB,LCK,PIK3R3,PIK3R5,SYK,TNF                                                                                                                                                                                                             |

|                                                                          |      |                      |       |                                                                                                                                                                                                                                                                                    |
|--------------------------------------------------------------------------|------|----------------------|-------|------------------------------------------------------------------------------------------------------------------------------------------------------------------------------------------------------------------------------------------------------------------------------------|
| <b>Small Cell Lung Cancer Signaling</b>                                  | 1.69 | 0.5773<br>50269      | 0.184 | AKT2,BID,CASP9,CCND1,CCNE2,CDK2,FLT3,IKBKE,IRS1,IRS2,KLB,MYC,NFKBIE,PIK3R3,PIK3R5,TRAF4                                                                                                                                                                                            |
| <b>Breast Cancer Regulation by Stathmin1</b>                             | 1.69 |                      | 0.153 | ADCY6,ARHGEF19,ARHGEF2,ARHGEF3,CCNE2,CDK1,CDK2,CDKN1A,E2F3,FLT3,GNAI2,GNB4,GNG2,IRS1,IRS2,ITPR2,KLB,PIK3R3,PIK3R5,PLCB2,PLCB4,PPM1J,PPP1R14B,PPP2R5A,PRKCB,PRKCQ,STMN1,TUBA1B,TUBA1C,TUBA3C/TUBA3D,TUBA4A,TUBA8,TUBB3                                                              |
| <b>Synaptogenesis is Signaling Pathway</b>                               | 1.68 | 3.3548<br>94804      | 0.144 | ACTR3,ADCY6,AKT2,AP2S1,ARPC1B,ARPC2,ARPC3,ARPC4,ARPC5,ARPC5L,BDNF,CADM1,CDH23,CDH24,CDH3,CFL1,CHN1,DAB1,DLG4,EIF4EBP1,EIF4EBP2,EPHA4,EPHA7,FGR,FLT3,GRIN3A,HCK,IRS1,IRS2,KLB,LCK,LYN,NECTIN3,PIK3R3,PIK3R5,PLCG2,RASGRP1,SNCA,SNCG,STXBP1,STXBP2,SYT12,SYT15,SYT17,THBS1,TIAM1,WAS |
| <b>D-myo-inositol-5-phosphate Metabolism</b>                             | 1.66 | 2.3533<br>93622      | 0.16  | ALPL,CA3,CDC25B,DUSP2,DUSP5,EYA4,HACD2,MTMR8,PHOSPHO1,PIP4K2A,PLCB2,PLCB4,PLCD4,PLCG2,PLD4,PPFIA3,PPP1R14B,PPP1R1B,PPP2R5A,PTPN22,PTPN6,PTPN7,PTPRC,PTPRF,PTPRJ,SOCS3                                                                                                              |
| <b>PI3K/AKT Signaling</b>                                                | 1.65 | 1.6059<br>10137      | 0.167 | AKT2,CCND1,CDKN1A,EIF4EBP1,GDF15,IKBKE,INPP5D,INPP5J,ITGA2,ITGA4,ITGA5,JAK3,MAP3K5,MAP3K8,MCL1,NFKBIE,PIK3R3,PPM1J,PPP2R5A,SYNJ2,THEM4,YWHAH                                                                                                                                       |
| <b>FAK Signaling</b>                                                     | 1.64 |                      | 0.173 | ACTB,ACTG1,AKT2,ASAP1,CAPN6,CAPN8,CAPN9,FLT3,HMMR,IRS1,IRS2,ITGA2,ITGA4,ITGA5,KLB,PIK3R3,PIK3R5,PLCG2,WAS                                                                                                                                                                          |
| <b>Role of JAK1 and JAK3 in yc Cytokine Signaling</b>                    | 1.64 |                      | 0.185 | BLNK,FLT3,IL15,IL2RG,IL4R,IL7R,IRS1,IRS2,JAK3,KLB,PIK3R3,PIK3R5,PTK2B,SOCS3,SYK                                                                                                                                                                                                    |
| <b>Retinoic acid Mediated Apoptosis Signaling</b>                        | 1.64 | 2.1105<br>79412      | 0.2   | BID,CASP3,CASP9,CRABP1,IRF1,PARP12,PARP14,PARP16,TNFRSF10A,TNFRSF10B,TNFRSF10C,TNFRSF10D                                                                                                                                                                                           |
| <b>FXR/RXR Activation</b>                                                | 1.6  |                      | 0.167 | AKT2,ALB,APOC1,APOL1,CLU,FBP1,IL18,IL1B,IL1RN,IL33,MAPK10,MLXIPL,PLTP,PON3,PPARA,SAA1,SDC1,SERPINA1,TF,TNF,VTN                                                                                                                                                                     |
| <b>Role of Cytokines in Mediating Communication between Immune Cells</b> | 1.6  |                      | 0.204 | CSF3,CXCL8,IL15,IL18,IL1B,IL1RN,IL32,IL33,IL6,TGFB1,TNF                                                                                                                                                                                                                            |
| <b>IL-2 Signaling</b>                                                    | 1.59 | 0.9045<br>34034      | 0.187 | AKT2,CSNK2A2,FLT3,IL2RG,IRS1,IRS2,JAK3,JUN,KLB,LCK,PIK3R3,PIK3R5,PTK2B,SYK                                                                                                                                                                                                         |
| <b>Salvage Pathways of Pyrimidine Ribonucleotides</b>                    | 1.57 | 3.1529<br>63125      | 0.175 | AK7,AKT2,APOBEC3A,APOBEC3B,APOBEC3G,CDA,CDK1,CDK2,MAP3K8,PCK1,PIM1,PRKCQ,PRKX,SGK1,TTK,UCK2,UPP1                                                                                                                                                                                   |
| <b>NRF2-mediated Oxidative Stress Response</b>                           | 1.52 | 1.6977<br>49375      | 0.15  | ABCC4,ACTB,ACTG1,BACH1,CAT,DNAJB11,DNAJB5,FLT3,FOSL1,FTH1,FTL,GCLC,GCLM,GSR,GSTM1,GSTM5,HERPUD1,HSPB8,IRS1,IRS2,JUN,KLB,MAFF,MAP3K5,NQO1,PIK3R3,PIK3R5,PRKCB,PRKCQ,TXN,TXNRD1                                                                                                      |
| <b>Thioredoxin Pathway</b>                                               | 1.52 |                      | 0.429 | NXN,TXN,TXNRD1                                                                                                                                                                                                                                                                     |
| <b>4-aminobutyrate Degradation I</b>                                     | 1.5  |                      | 0.667 | ABAT,SUCLG2                                                                                                                                                                                                                                                                        |
| <b>Glutathione Biosynthesis</b>                                          | 1.5  |                      | 0.667 | GCLC,GCLM                                                                                                                                                                                                                                                                          |
| <b>L-carnitine Biosynthesis</b>                                          | 1.5  |                      | 0.667 | ALDH9A1,TMLHE                                                                                                                                                                                                                                                                      |
| <b>Cell Cycle: G2/M DNA Damage Checkpoint Regulation</b>                 | 1.5  | -<br>1.4142<br>13562 | 0.204 | CCNB1,CCNB2,CDC25B,CDK1,CDKN1A,CDKN2A,CKS2,RPS6KA1,TO P2A,YWHAH                                                                                                                                                                                                                    |
| <b>UVA-Induced MAPK Signaling</b>                                        | 1.49 | 0.3015<br>11345      | 0.167 | CASP3,CASP9,FLT3,IRS1,IRS2,JUN,KLB,MAPK10,PARP12,PARP14,PARP16,PIK3R3,PIK3R5,PLCB2,PLCB4,PLCD4,PLCG2,RPS6KA1,RPS6KA6                                                                                                                                                               |
| <b>HER-2 Signaling in Breast Cancer</b>                                  | 1.49 |                      | 0.172 | AKT2,AREG,CASP9,CCND1,CCNE2,CDKN1A,FLT3,IRS1,IRS2,ITGB2,ITGB4,KLB,MAP3K5,PIK3R3,PIK3R5,PRKCB,PRKCQ                                                                                                                                                                                 |

|                                                                    |      |                      |       |                                                                                                                                                                                                                                                                                                                                       |
|--------------------------------------------------------------------|------|----------------------|-------|---------------------------------------------------------------------------------------------------------------------------------------------------------------------------------------------------------------------------------------------------------------------------------------------------------------------------------------|
| <b>Iron homeostasis signaling pathway</b>                          | 1.48 |                      | 0.161 | ATP6V0B,ATP6V0D1,ATP6V1B2,ATP6V1C2,BMP2,BMP3,CD163,CP,FT H1,FTL,GDF15,HEPH,HIF1A,IL6,JAK3,PDGFA,SLC11A1,SLC25A37,SLC39A14,SLC46A1,TF,TFRC                                                                                                                                                                                             |
| <b>Interferon Signaling</b>                                        | 1.48 | 2.8284<br>27125      | 0.222 | BAX,IFI35,IFITM1,IFITM2,IFITM3,IRF1,PSMB8,TAP1                                                                                                                                                                                                                                                                                        |
| <b>SPINK1 General Cancer Pathway</b>                               | 1.47 | -<br>1.6035<br>67451 | 0.176 | AKT2,FLT3,GZMA,IL6,IRS1,IRS2,JAK3,KLB,MT1A,MT1F,MT1G,MT1M,MT2A,PIK3R3,PIK3R5                                                                                                                                                                                                                                                          |
| <b>TNFR2 Signaling</b>                                             | 1.46 | 1.3416<br>40786      | 0.233 | BIRC3,IKBKE,JUN,NFKBIE,TNF,TNFAIP3,TNFRSF1B                                                                                                                                                                                                                                                                                           |
| <b>Regulation of the Epithelial-Mesenchymal Transition Pathway</b> | 1.44 |                      | 0.149 | AKT2,BCL9,ESRP2,FGF10,FGF11,FGF7,FGFRL1,FLT3,FZD7,FZD9,HGF,HIF1A,ID2,IRS1,IRS2,JAK3,KLB,LEF1,MMP9,NOTCH2,PIK3R3,PIK3R5,SNAI1,TCF7,TGFB1,TGFBR2,TWIST1,TWIST2,WNT2B,WNT3                                                                                                                                                               |
| <b>Dopamine Degradation</b>                                        | 1.42 | 0.7071<br>06781      | 0.216 | ALDH1A2,ALDH2,ALDH7A1,ALDH9A1,IL411,SULT1A1,SULT1A2,SULT1B1                                                                                                                                                                                                                                                                           |
| <b>PDGF Signaling</b>                                              | 1.42 | 1.5                  | 0.168 | CSNK2A2,FLT3,INPP5D,INPP5J,IRS1,IRS2,JAK3,JUN,KLB,MYC,PDGFA,PIK3R3,PIK3R5,PLCG2,PRKCB,SPHK1,SYNJ2                                                                                                                                                                                                                                     |
| <b>Type II Diabetes Mellitus Signaling</b>                         | 1.41 | 1.8856<br>18083      | 0.155 | ACSL1,ADIPOQ,AKT2,CACNA2D3,CACNG8,FLT3,IKBKE,INSR,IRS1,IRS2,KLB,MAP3K5,MAPK10,NFKBIE,NGFR,PIK3R3,PIK3R5,PRKCB,PRKCQ,SLC2A4,SOCS3,TNF,TNFRSF11B,TNFRSF1B                                                                                                                                                                               |
| <b>Paxillin Signaling</b>                                          | 1.41 | 0.8320<br>50294      | 0.161 | ACTB,ACTG1,ACTN2,FLT3,IRS1,IRS2,ITGA2,ITGA4,ITGA5,ITGA8,ITGA D,ITGAL,ITGAX,ITGB2,ITGB4,KLB,MAPK10,PIK3R3,PIK3R5,PTK2B                                                                                                                                                                                                                 |
| <b>Protein Kinase A Signaling</b>                                  | 1.39 | -<br>0.6172<br>134   | 0.135 | ADCY6,ADD2,AKAP13,AKAP6,CDC25B,CDKN3,CHP1,CREM,DUSP2,DUSP4,DUSP5,EYA1,GLI3,GNAI2,GNB4,GNG2,ITPR2,KDEL3,LEF1,LIP E,MYL12A,MYL4,MYLK,NFATC2,NFKBIE,NGFR,PDE11A,PDE1B,PDE3 A,PLCB2,PLCB4,PLCD4,PLCG2,PLD6,PPP1R14B,PPP1R1B,PRKCB,PRKCQ,PTCH1,PTK2B,PTPN22,PTPN3,PTPN6,PTPN7,PTPRC,PTPRE,PTPRF,PTPRJ,TCF7,TGFB1,TGFBR2,UBASH3B,VASP,YWHAH |
| <b>Neuropathic Pain Signaling In Dorsal Horn Neurons</b>           | 1.39 | 1.4142<br>13562      | 0.162 | BDNF,FLT3,GPR37,GRIN3A,IRS1,IRS2,ITPR2,KCNH2,KCNQ3,KLB,PIK3R3,PIK3R5,PLCB2,PLCB4,PLCD4,PLCG2,PRKCB,PRKCQ,TACR1                                                                                                                                                                                                                        |
| <b>Ephrin Receptor Signaling</b>                                   | 1.37 | 3.8376<br>12894      | 0.15  | ACTR3,AKT2,ARPC1B,ARPC2,ARPC3,ARPC4,ARPC5,ARPC5L,CFL1,CXCR4,EPHA4,EPHA7,GNA15,GNAI2,GNB4,GNG2,GRIN3A,ITGA2,ITGA4,ITGA5,MAP4K4,PDGFA,RAC2,SDC2,VEGFC,WAS,WIPF1                                                                                                                                                                         |
| <b>IL-17A Signaling in Airway Cells</b>                            | 1.37 | 0                    | 0.175 | AKT2,CXCL1,CXCL3,FLT3,IKBKE,IL6,IRS1,IRS2,JAK3,KLB,MAPK10,NFKBIE,PIK3R3,PIK3R5                                                                                                                                                                                                                                                        |
| <b>Role of IL-17F in Allergic Inflammatory Airway Diseases</b>     | 1.35 | 2.1213<br>20344      | 0.2   | CCL2,CCL4,CXCL1,CXCL10,CXCL8,IL1B,IL6,RPS6KA1,RPS6KA6                                                                                                                                                                                                                                                                                 |
| <b>Adenine and Adenosine Salvage III</b>                           | 1.35 |                      | 0.375 | ADA2,HPRT1,PNP                                                                                                                                                                                                                                                                                                                        |
| <b>Histidine Degradation III</b>                                   | 1.35 |                      | 0.375 | MTHFD1,MTHFD1L,MTHFD2                                                                                                                                                                                                                                                                                                                 |
| <b>Superoxide Radicals Degradation</b>                             | 1.35 |                      | 0.375 | CAT,GPX7,NQO1                                                                                                                                                                                                                                                                                                                         |
| <b>G-Protein Coupled Receptor Signaling</b>                        | 1.35 |                      | 0.14  | ADCY6,ADORA1,ADORA3,AKT2,CCR4,CXCR2,DUSP4,FLT3,FPR1,FP R2,GNA15,GNAI2,HRH2,HTR7,IKBKE,IRS1,IRS2,KLB,MAP3K8,NFKBIE,P2RY13,PDE11A,PDE1B,PDE3A,PIK3R3,PIK3R5,PLCB2,PLCB4,PLD6,PRKCB,PTGIR,PTK2B,RAP1GAP,RASGRP1,RGS10,RGS16,RGS18,RGS2,RPS6KA1,S1PR1                                                                                     |
| <b>Leptin Signaling in Obesity</b>                                 | 1.35 | -1                   | 0.17  | ADCY6,AKT2,FLT3,IRS1,IRS2,KLB,LEP,PDE3A,PIK3R3,PIK3R5,PLCB2,PLCB4,PLCD4,PLCG2,SOCS3                                                                                                                                                                                                                                                   |
| <b>Sumoylation Pathway</b>                                         | 1.35 | -<br>1.1547<br>00538 | 0.165 | AR,ARHGDI,CEBPA,FASLG,ISG20,JUN,MAP3K5,MAPK10,RAC2,RHO C,RHOG,RHOH,RHOU,RND1,SNCA,UBA2,ZNF217                                                                                                                                                                                                                                         |

|                                          |      |                 |       |                                                                                                                                                                                                                                                                   |
|------------------------------------------|------|-----------------|-------|-------------------------------------------------------------------------------------------------------------------------------------------------------------------------------------------------------------------------------------------------------------------|
| <b>Mitotic Roles of Polo-Like Kinase</b> | 1.35 | 1               | 0.182 | CCNB1,CCNB2,CDC20,CDC25B,CDC7,CDK1,ESPL1,PLK3,PPM1J,PPP2R5A,PTTG1,TGFB1                                                                                                                                                                                           |
| <b>Xenobiotic Metabolism Signaling</b>   | 1.34 |                 | 0.139 | ABCB1,ABCC3,AHR,ALDH1A2,ALDH2,ALDH6A1,ALDH7A1,ALDH9A1,ANKRA2,CAT,CES1,CHST11,CITED2,CYP1B1,CYP2C8,FLT3,FMO2,FTL,GCLC,GRIP1,GSTM1,GSTM5,HS3ST2,IL1B,IL4I1,IL6,IRS1,IRS2,KLB,MAP3K5,MAP3K8,NQO1,PIK3R3,PIK3R5,PPM1J,PPP2R5A,PRKCB,PRKCQ,SULT1A1,SULT1A2,SULT1B1,TNF |
| <b>IL-17 Signaling</b>                   | 1.33 |                 | 0.167 | AKT2,CCL2,CXCL1,CXCL10,CXCL11,CXCL8,FLT3,IL6,IRS1,IRS2,JUN,KLB,MAPK10,PIK3R3,PIK3R5,TIMP1                                                                                                                                                                         |
| <b>Neuregulin Signaling</b>              | 1.33 | 1.9414<br>50687 | 0.167 | AKT2,AREG,BTC,DLG4,EREG,HBEGF,ITGA2,ITGA4,ITGA5,MATK,MYC,PIK3R3,PLCG2,PRKCB,PRKCQ,TGFA                                                                                                                                                                            |
| <b>Ceramide Signaling</b>                | 1.32 | 2.5             | 0.163 | AKT2,FLT3,IRS1,IRS2,JUN,KLB,NGFR,PIK3R3,PIK3R5,PPM1J,PPP2R5A,S1PR1,S1PR5,SPHK1,TNF,TNFRSF11B,TNFRSF1B                                                                                                                                                             |
| <b>RANK Signaling in Osteoclasts</b>     | 1.32 | 0               | 0.163 | AKT2,BIRC3,CHP1,FLT3,IKBKE,IRS1,IRS2,JUN,KLB,MAP3K5,MAP3K8,MAPK10,NFATC2,NFKBIE,PIK3R3,PIK3R5,PTK2B                                                                                                                                                               |
| <b>3-phosphoinositide Degradation</b>    | 1.32 | 2.0412<br>41452 | 0.152 | ALPL,CA3,CDC25B,DUSP2,DUSP5,EYA4,HACD2,INPP4B,INPP5D,INPP5J,MTMR8,PHOSPHO1,PPFIA3,PPP1R14B,PPP1R1B,PPP2R5A,PTPN22,PTPN6,PTPN7,PTPRC,PTPRF,PTPRJ,SOCS3,SYNJ2                                                                                                       |

**Supplementary table 9. Raw data for PNA IPA analysis in peritumoral fat cohort (appendix p 14).**

| Ingenuity Canonical Pathways                                           | -log <sub>10</sub> (p-value) | Z-score     | Ratio  | Molecules                                                                                |
|------------------------------------------------------------------------|------------------------------|-------------|--------|------------------------------------------------------------------------------------------|
| <b>Antigen Presentation Pathway</b>                                    | 4.04                         |             | 0.179  | B2M,HLA-C,HLA-DPA1,HLA-DPB1,HLA-DQB2,HLA-DRA,PSMB8                                       |
| <b>Granulocyte Adhesion and Diapedesis</b>                             | 3.8                          |             | 0.0838 | CCL19,CCL4,CCL5,CSF3,CXCL10,FPR1,FPR2,ITGA4,ITGAL,MMP14,MMP28,SELE,SELL,THY1,XCL2        |
| <b>Primary Immunodeficiency Signaling</b>                              | 3.35                         |             | 0.14   | CD3E,CD8A,IGHD,IGHM,IIGL1/IIGL5,IL2RG,PTPRC                                              |
| <b>Fcγ Receptor-mediated Phagocytosis in Macrophages and Monocytes</b> | 2.9                          | 0.333333333 | 0.0957 | FCGR3A/FCGR3B,FYB1,GAB2,LCP2,PLD6,PTK2B,RAB11B,RAC2,SRC                                  |
| <b>Communication between Innate and Adaptive Immune Cells</b>          | 2.84                         |             | 0.0938 | B2M,CCL4,CCL5,CD8A,CXCL10,HLA-C,HLA-DRA,IGHD,IGHM                                        |
| <b>Th1 Pathway</b>                                                     | 2.79                         | 1.341640786 | 0.0803 | CD3E,CD8A,FGFR4,GAB2,HLA-DPA1,HLA-DPB1,HLA-DQB2,HLA-DRA,KLRD1,RUNX3,STAT1                |
| <b>Pathogenesis of Multiple Sclerosis</b>                              | 2.79                         |             | 0.333  | CCL4,CCL5,CXCL10                                                                         |
| <b>Cytotoxic T Lymphocyte-mediated Apoptosis of Target Cells</b>       | 2.74                         |             | 0.156  | B2M,CASP9,CD3E,GZMB,HLA-C                                                                |
| <b>Th1 and Th2 Activation Pathway</b>                                  | 2.63                         |             | 0.0695 | CD3E,CD8A,FGFR4,GAB2,GF1,HLA-DPA1,HLA-DPB1,HLA-DQB2,HLA-DRA,IL2RG,KLRD1,RUNX3,STAT1      |
| <b>Cdc42 Signaling</b>                                                 | 2.58                         | 0.816496581 | 0.0719 | B2M,CD3E,CDC42EP2,DIAPH3,HLA-C,HLA-DPA1,HLA-DPB1,HLA-DQB2,HLA-DRA,ITGA4,MYL4,SRC         |
| <b>Leukocyte Extravasation Signaling</b>                               | 2.56                         | 1.732050808 | 0.0657 | CD44,FGFR4,GAB2,ITGA4,ITGAL,MMP14,MMP28,PTK2B,RAC2,RASGRP1,RASSF5,RHOH,SRC,THY1          |
| <b>Agranulocyte Adhesion and Diapedesis</b>                            | 2.53                         |             | 0.0677 | CCL19,CCL4,CCL5,CXCL10,ITGA4,ITGB7,MMP14,MMP28,MYH7B,MYL4,SELE,SELL,XCL2                 |
| <b>Caveolar-mediated Endocytosis Signaling</b>                         | 2.44                         |             | 0.0986 | B2M,CD48,HLA-C,ITGA4,ITGAL,ITGB7,SRC                                                     |
| <b>Colorectal Cancer Metastasis Signaling</b>                          | 2.44                         | 0.577350269 | 0.0599 | AXIN1,BIRC5,CASP9,FGFR4,GAB2,LEF1,MMP14,MMP28,MSH2,RAC2,RHOD,RHOH,SMAD3,SRC,STAT1,TCF7L1 |
| <b>B Cell Receptor Signaling</b>                                       | 2.43                         | 0.632455532 | 0.066  | CD22,CREBBP,EGR1,FGFR4,GAB2,IGHD,IGHM,INPPL1,MAP2K7,PTK2B,PTPRC,RAC2,RASSF5              |

|                                                                              |      |                      |        |                                                                                         |
|------------------------------------------------------------------------------|------|----------------------|--------|-----------------------------------------------------------------------------------------|
| <b>OX40 Signaling Pathway</b>                                                | 2.43 |                      | 0.0889 | B2M,CD3E,HLA-C,HLA-DPA1,HLA-DPB1,HLA-DQB2,HLA-DRA,TRAF3                                 |
| <b>Reelin Signaling in Neurons</b>                                           | 2.32 |                      | 0.0851 | ARHGEF4,CDK5,FGFR4,GAB2,ITGA4,ITGAL,MAP2K7, SRC                                         |
| <b>Production of Nitric Oxide and Reactive Oxygen Species in Macrophages</b> | 2.3  | 0.9045<br>34034      | 0.0637 | CLU,CREBBP,FGFR4,GAB2,MAP2K7,PPP1R14A,PPP2R3B,RAC2,RHOD,RHOH,S100A8,SERPINA1,STAT1      |
| <b>Endocannabinoid Cancer Inhibition Pathway</b>                             | 2.29 | 1.2649<br>11064      | 0.0692 | CASP1,CASP9,CREBBP,FGFR4,GAB2,LEF1,MAP2K7, SRC,TCF7L1,TWIST2, VIM                       |
| <b>TR/RXR Activation</b>                                                     | 2.16 |                      | 0.08   | AKR1C3,FGFR4,GAB2,NCOR2,RCAN2,RXRA,SREBF2,THRA                                          |
| <b>IL-15 Production</b>                                                      | 2.16 |                      | 0.0744 | ALK,CSF2RA,ERBB4,FGFR4,MAP2K7,MST1R,PTK2B, SRC,STAT1                                    |
| <b>Virus Entry via Endocytic Pathways</b>                                    | 2.16 |                      | 0.0744 | B2M,FGFR4,GAB2,HLA-C,ITGA4,ITGAL,ITGB7,RAC2, SRC                                        |
| <b>CTLA4 Signaling in Cytotoxic T Lymphocytes</b>                            | 2.13 |                      | 0.0792 | B2M,CD3E,CD8A,FGFR4,GAB2,HLA-C,LCP2,PPP2R3B                                             |
| <b>Superpathway of Inositol Phosphate Compounds</b>                          | 2.11 | -<br>1.7320<br>50808 | 0.0583 | ERBB4,EYA4,FGFR4,GAB2,INPPL1,NT5C,NUDT3,PIP4K2A,PPFIBP2,PPP1R14A,PTPN23,PTPRC,RAC2, SRC |
| <b>Activation of IRF by Cytosolic Pattern Recognition Receptors</b>          | 2.09 | 0                    | 0.0952 | CREBBP,DHX58,IFIH1,STAT1,TRAF3,ZBP1                                                     |
| <b>Sumoylation Pathway</b>                                                   | 2.08 | 0.3779<br>64473      | 0.0777 | ARHGDIB,CREBBP,PIAS4,RAC2,RCC1,RFC4,RHOD,RHOH                                           |
| <b>Allograft Rejection Signaling</b>                                         | 1.99 |                      | 0.0814 | B2M,GZMB,HLA-C,HLA-DPA1,HLA-DPB1,HLA-DQB2,HLA-DRA                                       |
| <b>Th2 Pathway</b>                                                           | 1.98 | 0.4472<br>13595      | 0.0658 | CD3E,FGFR4,GAB2,GFI1,HLA-DPA1,HLA-DPB1,HLA-DQB2,HLA-DRA,IL2RG,RUNX3                     |
| <b>Regulation of the Epithelial-Mesenchymal Transition Pathway</b>           | 1.95 |                      | 0.0597 | AXIN1,EGR1,ESRP2,FGF10,FGF13,FGFR4,GAB2,LEF1,MAP2K7,SMAD3,TCF7L1,TWIST2                 |
| <b>Hematopoiesis from Pluripotent Stem Cells</b>                             | 1.94 |                      | 0.102  | CD3E,CD8A,CSF3,IGHD,IGHM                                                                |
| <b>RhoGDI Signaling</b>                                                      | 1.9  | 0                    | 0.0611 | ARHGDIB,ARHGEF4,CD44,CDH23,CREBBP,ITGA4,MYL4,RAC2,RHOD,RHOH, SRC                        |
| <b>Glioma Invasiveness Signaling</b>                                         | 1.89 | 0.4472<br>13595      | 0.0778 | CD44,F2R,FGFR4,GAB2,RAC2,RHOD,RHOH                                                      |
| <b>Differential Regulation of Cytokine</b>                                   | 1.89 |                      | 0.167  | CCL4,CCL5,CSF3                                                                          |

|                                                                                             |      |                      |        |                                                                                                     |
|---------------------------------------------------------------------------------------------|------|----------------------|--------|-----------------------------------------------------------------------------------------------------|
| <b>Production in Macrophages and T Helper Cells by IL-17A and IL-17F</b>                    |      |                      |        |                                                                                                     |
| <b>3-phosphoinositide Biosyntheses</b>                                                      | 1.89 | -<br>1.8973<br>66596 | 0.0585 | ERBB4,EYA4,FGFR4,GAB2,NT5C,NUDT3,PPFIBP2,PPP1R14A,PTPN23,PTPRC,RAC2,SRC                             |
| <b>ILK Signaling</b>                                                                        | 1.89 | 0.3333<br>33333      | 0.0585 | CREBBP,FGFR4,GAB2,ITGB7,LEF1,MYH7B,MYL4,PPP2R3B,RAC2,RHOD,RHOH,VIM                                  |
| <b>Signaling by Rho Family GTPases</b>                                                      | 1.84 | -<br>0.5773<br>50269 | 0.0541 | ARHGEF4,CDC42EP2,CDH23,DIAPH3,FGFR4,GAB2,ITGA4,MAP2K7,MYL4,PTK2B,RAC2,RHOD,RHOH,VIM                 |
| <b>Claathrin-mediated Endocytosis Signaling</b>                                             | 1.84 |                      | 0.0577 | CLU,F2R,FGF10,FGF13,FGFR4,GAB2,HIP1,ITGB7,RAB11B,S100A8,SERPINA1,SRC                                |
| <b>Actin Cytoskeleton Signaling</b>                                                         | 1.83 | 1                    | 0.0556 | ARHGEF4,CYFIP2,DIAPH3,F2R,FGF10,FGF13,FGFR4,GAB2,GSN,ITGA4,MYH7B,MYL4,RAC2                          |
| <b>Neuroinflammation Signaling Pathway</b>                                                  | 1.81 | 1.0690<br>44968      | 0.0511 | B2M,BIRC3,BIRC5,CASP1,CCL5,CREBBP,CXCL10,FGFR4,GAB2,HLA-C,HLA-DRA,PLA2G2D,SLC6A1,STAT1,TICAM2,TRAF3 |
| <b>Role of Osteoblasts, Osteoclasts and Chondrocytes in Rheumatoid Arthritis</b>            | 1.8  |                      | 0.0551 | AXIN1,BIRC3,CASP9,FGFR4,GAB2,GSN,LEF1,MAP2K7,MMP14,PTK2B,RUNX2,SRC,TCF7L1                           |
| <b>Phagosome Formation</b>                                                                  | 1.77 |                      | 0.0643 | FCER1A,FCGR1B,FCGR3A/FCGR3B,FGFR4,GAB2,ITGA4,RAC2,RHOD,RHOH                                         |
| <b>B Cell Development</b>                                                                   | 1.76 |                      | 0.111  | HLA-DRA,IGHD,IGHM,PTPRC                                                                             |
| <b>T Cell Exhaustion Signaling Pathway</b>                                                  | 1.74 | 0                    | 0.0579 | FGFR4,GAB2,GZMB,HLA-C,HLA-DPA1,HLA-DPB1,HLA-DQB2,HLA-DRA,PPP2R3B,SMAD3,STAT1                        |
| <b>LXR/RXR Activation</b>                                                                   | 1.69 | 0                    | 0.0661 | CLU,LY96,NCOR2,RXRA,S100A8,SAA2,SCD,SERPINA1                                                        |
| <b>Wnt/<math>\beta</math>-catenin Signaling</b>                                             | 1.62 | 0.6324<br>55532      | 0.0578 | AXIN1,AXIN2,CD44,CREBBP,CSNK1E,LEF1,PPP2R3B,SOX12,SRC,TCF7L1                                        |
| <b>Citrulline Biosyntheses</b>                                                              | 1.61 |                      | 0.222  | ARG1,LOC102724788/PRODH                                                                             |
| <b>Folate Transformations I</b>                                                             | 1.61 |                      | 0.222  | MTHFD1L,MTHFS                                                                                       |
| <b>Acute Myeloid Leukemia Signaling</b>                                                     | 1.6  | -<br>1.3416<br>40786 | 0.068  | CSF2RA,FGFR4,GAB2,LEF1,MAP2K7,PIM2,TCF7L1                                                           |
| <b>Differential Regulation of Cytokine Production in Intestinal Epithelial Cells by IL-</b> | 1.6  |                      | 0.13   | CCL4,CCL5,CSF3                                                                                      |

|                                                                 |      |                      |        |                                                                                                         |
|-----------------------------------------------------------------|------|----------------------|--------|---------------------------------------------------------------------------------------------------------|
| <b>17A and IL-17F</b>                                           |      |                      |        |                                                                                                         |
| <b>RANK Signaling in Osteoclasts</b>                            | 1.58 | -<br>0.8164<br>96581 | 0.0673 | BIRC3,FGFR4,GAB2,GSN,MAP2K7,PTK2B,SRC                                                                   |
| <b>Integrin Signaling</b>                                       | 1.56 | 0.6324<br>55532      | 0.0524 | CAPN10,CAPN9,FGFR4,GAB2,GSN,ITGA4,ITGAL,ITGB7,RAC2,RHOD,RHOH,SRC                                        |
| <b>Tumoricidal Function of Hepatic Natural Killer Cells</b>     | 1.55 |                      | 0.125  | CASP9,GZMB,ITGAL                                                                                        |
| <b>Histamine Biosynthesis</b>                                   | 1.55 |                      | 1      | HDC                                                                                                     |
| <b>Lanosterol Biosynthesis</b>                                  | 1.55 |                      | 1      | LSS                                                                                                     |
| <b>Sorbitol Degradation I</b>                                   | 1.55 |                      | 1      | SORD                                                                                                    |
| <b>Thiamin Salvage III</b>                                      | 1.55 |                      | 1      | TPK1                                                                                                    |
| <b>Phospholipase C Signaling</b>                                | 1.54 | 0                    | 0.0506 | ARHGEF4,CD3E,CREBBP,ITGA4,LCP2,MYL4,PLA2G2D,PLD6,PPP1R14A,RAC2,RHOD,RHOH,SRC                            |
| <b>Fc Epsilon RI Signaling</b>                                  | 1.53 | 1.1338<br>93419      | 0.0615 | FCER1A,FGFR4,GAB2,INPPL1,LCP2,MAP2K7,PLA2G2D,RAC2                                                       |
| <b>Tec Kinase Signaling</b>                                     | 1.52 | 0.7071<br>06781      | 0.0556 | FCER1A,FGFR4,GAB2,ITGA4,PTK2B,RAC2,RHOD,RHOH,SRC,STAT1                                                  |
| <b>HIPPO signaling</b>                                          | 1.5  |                      | 0.0706 | CD44,CSNK1E,DLG5,PPP1R14A,PPP2R3B,SMAD3                                                                 |
| <b>ERK/MAPK Signaling</b>                                       | 1.49 | 1.2649<br>11064      | 0.0529 | CREBBP,FGFR4,GAB2,ITGA4,PLA2G2D,PPP1R14A,PPP2R3B,PTK2B,RAC2,SRC,STAT1                                   |
| <b>Role of RIG1-like Receptors in Antiviral Innate Immunity</b> | 1.47 |                      | 0.0909 | CREBBP,DHX58,IFIH1,TRAF3                                                                                |
| <b>PXR/RXR Activation</b>                                       | 1.46 |                      | 0.0769 | ABCC3,CYP3A4,GSTM1,RXRA,SCD                                                                             |
| <b>Sphingosine-1-phosphate Signaling</b>                        | 1.46 | 0                    | 0.0597 | CASP1,CASP9,FGFR4,GAB2,PTK2B,RAC2,RHOD,RHOH                                                             |
| <b>Molecular Mechanisms of Cancer</b>                           | 1.46 |                      | 0.0448 | ARHGEF4,AXIN1,BIRC3,CASP9,CDK1,CDK5,CREBBP,FGFR4,GAB2,ITGA4,LEF1,PTCH1,RAC2,RASGRP1,RHOD,RHOH,SMAD3,SRC |
| <b>Role of Tissue Factor in Cancer</b>                          | 1.45 |                      | 0.0593 | CTGF,CYR61,EGR1,FGFR4,GAB2,PDIA2,PTK2B,SRC                                                              |
| <b>Hepatic Fibrosis / Hepatic Stellate Cell Activation</b>      | 1.44 |                      | 0.0538 | A2M,CCL5,COL9A1,COL9A3,CTGF,LY96,MYH7B,MYL4,SMAD3,STAT1                                                 |
| <b>Osteoarthritis Pathway</b>                                   | 1.44 | 0.3333<br>33333      | 0.0519 | CASP1,CASP9,CREBBP,GLI3,ITGA4,LEF1,PTCH1,RUNX2,S100A8,SMAD3,TCF7L1                                      |
| <b>Type I Diabetes Mellitus Signaling</b>                       | 1.44 | 0.4472<br>13595      | 0.0631 | CASP9,CD3E,GZMB,HLA-C,HLA-DRA,MAP2K7,STAT1                                                              |
| <b>Regulation of Cellular Mechanics by Calpain Protease</b>     | 1.43 | -<br>0.4472<br>13595 | 0.0758 | CAPN10,CAPN9,CDK1,ITGA4,SRC                                                                             |



|                                                                   |      |                      |        |                                                                       |
|-------------------------------------------------------------------|------|----------------------|--------|-----------------------------------------------------------------------|
| <b>Crosstalk between Dendritic Cells and Natural Killer Cells</b> | 1.42 |                      | 0.0674 | CD69,HLA-C,HLA-DRA,IL2RG,ITGAL,KLRD1                                  |
| <b>Amyotrophic Lateral Sclerosis Signaling</b>                    | 1.41 | -<br>0.8164<br>96581 | 0.0619 | BIRC3,CAPN10,CAPN9,CASP1,CASP9,FGFR4,GAB2                             |
| <b>Germ Cell-Sertoli Cell Junction Signaling</b>                  | 1.41 |                      | 0.0532 | A2M,AXIN1,FGFR4,GAB2,GSN,MAP2K7,RAC2,RHOD,RHOH,SRC                    |
| <b>IL-9 Signaling</b>                                             | 1.38 |                      | 0.0851 | FGFR4,GAB2,IL2RG,STAT1                                                |
| <b>Lymphotoxin <math>\beta</math> Receptor Signaling</b>          | 1.36 |                      | 0.0725 | CASP9,CREBBP,FGFR4,GAB2,TRAF3                                         |
| <b>EGF Signaling</b>                                              | 1.34 | -1                   | 0.0714 | FGFR4,GAB2,MAP2K7,SRC,STAT1                                           |
| <b>Regulation of Actin-based Motility by Rho</b>                  | 1.32 | 1.3416<br>40786      | 0.0638 | GSN,ITGA4,MYL4,RAC2,RHOD,RHOH                                         |
| <b>Bile Acid Biosynthesis, Neutral Pathway</b>                    | 1.31 |                      | 0.154  | AKR1C3,CYP3A4                                                         |
| <b>Urate Biosynthesis/Inosine 5'-phosphate Degradation</b>        | 1.31 |                      | 0.154  | IMPDH1,NT5C                                                           |
| <b>Role of NFAT in Regulation of the Immune Response</b>          | 1.31 | 1                    | 0.051  | CD3E,CSNK1E,FCER1A,FCGR1B,FCGR3A/FCGR3B,FGFR4,GAB2,HLA-DRA,LCP2,RCAN2 |

**Supplementary table 10. Raw data for TUMOR IPA analysis in peritumoral fat cohort (appendix p 14).**

| Ingenuity Canonical Pathways                                       | -log10(p-value) | zScore  | Ratio | Molecules                                                                               |
|--------------------------------------------------------------------|-----------------|---------|-------|-----------------------------------------------------------------------------------------|
| <b>Phagosome Maturation</b>                                        | 3.34            |         | 0.0   | ATP6V0A4,ATP6V1B1,ATP6V1C2,CTSF,CTSS,CTSZ,NOS1,SNAP25,TUBA3C/TUBA3D,TUBB3,TUBB4B,VPS37B |
| <b>Atherosclerosis Signaling</b>                                   | 3.32            |         | 0.0   | ALOX15B,APOC1,APOE,CXCR4,MMP1,MMP9,PLA2G2D,PLA2G7,PLBD1,S100A8,SELPLG                   |
| <b>Glioma Invasiveness Signaling</b>                               | 3.29            | 1.88982 | 0.1   | CD44,FGFR3,FLT3,HMMR,MMP9,PIK3R6,PLAUR,RHOBTB2,RHOQ                                     |
| <b>Th1 and Th2 Activation Pathway</b>                              | 2.94            |         | 0.0   | CD4,CD80,CD86,CXCR4,FGFR3,FLT3,HAVCR1,IL10RA,IL18R1,IL2RA,KLRD1,PIK3R6,TIMD4            |
| <b>Natural Killer Cell Signaling</b>                               | 2.63            |         | 0.0   | CD300A,FCER1G,FCGR2A,FGFR3,FLT3,INPP5J,KLRB1,KLRD1,PIK3R6,SIGLEC7                       |
| <b>T Helper Cell Differentiation</b>                               | 2.57            |         | 0.0   | CD80,CD86,CXCR5,FCER1G,IL10RA,IL18R1,IL2RA                                              |
| <b>Phagosome Formation</b>                                         | 2.47            |         | 0.0   | CR1,FCER1G,FCGR2A,FCGR2B,FGFR3,FLT3,PIK3R6,RHOBTB2,RHOQ,TLR5                            |
| <b>Communication between Innate and Adaptive Immune Cells</b>      | 2.47            |         | 0.0   | CD4,CD79A,CD80,CD86,FCER1G,IGHM,TLR5,TNFSF13B                                           |
| <b>Osteoarthritis Pathway</b>                                      | 2.46            | 2.52982 | 0.0   | CASP5,CASP8,DKK1,FGFR3,MMP1,MMP9,PTH1R,PTHLH,S100A8,S100A9,SMAD6,SOX9,TCF7              |
| <b>Systemic Lupus Erythematosus Signaling</b>                      | 2.42            |         | 0.0   | CD22,CD79A,CD80,CD86,FCER1G,FCGR2A,FCGR2B,FGFR3,FLT3,IGHM,KNG1,PIK3R6,PIM2,TNFSF13B     |
| <b>Role of IL-17A in Psoriasis</b>                                 | 2.4             |         | 0.2   | CCL20,S100A8,S100A9                                                                     |
| <b>CTLA4 Signaling in Cytotoxic T Lymphocytes</b>                  | 2.34            |         | 0.0   | AP1S3,CD80,CD86,FCER1G,FGFR3,FLT3,PIK3R6,PPP2R2C                                        |
| <b>Acute Myeloid Leukemia Signaling</b>                            | 2.29            | -       | 0.0   | CCND1,CSF2RA,FGFR3,FLT3,IDH1,PIK3R6,PIM2,TCF7                                           |
| <b>Th2 Pathway</b>                                                 | 2.21            | 1.63299 | 0.0   | CD4,CD80,CD86,CXCR4,FGFR3,FLT3,HAVCR1,IL2RA,PIK3R6,TIMD4                                |
| <b>Serine Biosynthesis</b>                                         | 2.2             |         | 0.4   | PSAT1,PSPH                                                                              |
| <b>Cell Cycle: G2/M DNA Damage Checkpoint Regulation</b>           | 2.08            | -       | 0.1   | AURKA,CCNB2,CDC25C,GADD45A,TOP2A                                                        |
| <b>Chondroitin Sulfate Biosynthesis (Late Stages)</b>              | 2.08            | 1.34164 | 0.1   | CHST11,CHST9,HS3ST2,HS6ST1,SULT1A1                                                      |
| <b>Altered T Cell and B Cell Signaling in Rheumatoid Arthritis</b> | 2.07            |         | 0.0   | CD79A,CD80,CD86,FCER1G,SLAMF1,TLR5,TNFSF13B                                             |
| <b>FcγRIIB Signaling in B Lymphocytes</b>                          | 2.07            | 1       | 0.0   | BTK,CACNB4,CD79A,FCGR2B,FGFR3,FLT3,PIK3R6                                               |
| <b>Th1 Pathway</b>                                                 | 2.04            | 1.63299 | 0.0   | CD4,CD80,CD86,FGFR3,FLT3,IL10RA,IL18R1,KLRD1,PIK3R6                                     |
| <b>Primary Immunodeficiency Signaling</b>                          | 2.04            |         | 0.1   | BTK,CD4,CD79A,IGHM,IGLL1/IGLL5                                                          |
| <b>Coagulation System</b>                                          | 1.92            | 2       | 0.1   | F13A1,KNG1,PLAUR,PROC                                                                   |
| <b>Role of NFAT in Regulation of the Immune Response</b>           | 1.89            | 2.52982 | 0.0   | BTK,CD4,CD79A,CD80,CD86,FCER1G,FCGR2A,FCGR2B,FGFR3,FLT3,PIK3R6                          |
| <b>Superpathway of Serine and Glycine Biosynthesis I</b>           | 1.89            |         | 0.2   | PSAT1,PSPH                                                                              |
| <b>Opioid Signaling Pathway</b>                                    | 1.88            | -       | 0.0   | CACNB4,FOSB,GRK3,NOS1,PNOC,RGS1,RGS10,RGS17,RGS18,RGS20,RGS7,RYR2,SRF                   |
| <b>LXR/RXR Activation</b>                                          | 1.88            | 0       | 0.0   | APOC1,APOE,APOH,GC,KNG1,MMP9,RXRA,S100A8                                                |
| <b>B Cell Development</b>                                          | 1.87            |         | 0.1   | CD79A,CD80,CD86,IGHM                                                                    |
| <b>Inflammasome pathway</b>                                        | 1.85            |         | 0.1   | CASP5,CASP8,NLRP3                                                                       |
| <b>VDR/RXR Activation</b>                                          | 1.82            |         | 0.0   | GADD45A,IGFBP1,IGFBP6,KLF4,RXRA,TRPV6                                                   |

|                                                                  |      |                 |            |                                                                                       |
|------------------------------------------------------------------|------|-----------------|------------|---------------------------------------------------------------------------------------|
| <b>Chondroitin Sulfate Biosynthesis</b>                          | 1.81 | 1.34164<br>0786 | 0.0<br>877 | CHST11,CHST9,HS3ST2,HS6ST1,SULT1A1                                                    |
| <b>iCOS-iCOSL Signaling in T Helper Cells</b>                    | 1.8  | 1.34164<br>0786 | 0.0<br>64  | CD4,CD80,CD86,FCER1G,FGFR3,FLT3,IL2RA,PIK3R6                                          |
| <b>Neuroinflammation Signaling Pathway</b>                       | 1.79 | 1.38675<br>0491 | 0.0<br>479 | CALB2,CASP8,CD80,CD86,FGFR3,FLT3,GAD1,MMP9,NLRP3,PIK3R6,PLA2G2D,S100B,SNCA,TLR5,TREM2 |
| <b>Airway Pathology in Chronic Obstructive Pulmonary Disease</b> | 1.78 |                 | 0.2<br>5   | MMP1,MMP9                                                                             |
| <b>Inhibition of Matrix Metalloproteases</b>                     | 1.76 | -1              | 0.1<br>03  | ADAM12,MMP1,MMP9,TFPI2                                                                |
| <b>Ephrin A Signaling</b>                                        | 1.67 |                 | 0.0<br>806 | EFNA5,EPHA6,FGFR3,FLT3,PIK3R6                                                         |
| <b>GM-CSF Signaling</b>                                          | 1.67 | 0               | 0.0<br>714 | CCND1,CISH,CSF2RA,FGFR3,FLT3,PIK3R6                                                   |
| <b>GP6 Signaling Pathway</b>                                     | 1.62 | 1.13389<br>3419 | 0.0<br>593 | BTK,COL11A1,COL24A1,FCER1G,FGFR3,FLT3,LAMB2,PIK3R6                                    |
| <b>Small Cell Lung Cancer Signaling</b>                          | 1.61 | -1              | 0.0<br>69  | CCND1,FGFR3,FLT3,NOS1,PIK3R6,RXRA                                                     |
| <b>Mitotic Roles of Polo-Like Kinase</b>                         | 1.56 |                 | 0.0<br>758 | CCNB2,CDC16,CDC25C,PPP2R2C,PRC1                                                       |
| <b>Dermatan Sulfate Biosynthesis (Late Stages)</b>               | 1.52 | 1               | 0.0<br>87  | CHST11,HS3ST2,HS6ST1,SULT1A1                                                          |
| <b>Eicosanoid Signaling</b>                                      | 1.51 |                 | 0.0<br>735 | ALOX15B,PLA2G2D,PLA2G7,PLBD1,TBXAS1                                                   |
| <b>B Cell Receptor Signaling</b>                                 | 1.5  | 1.63299<br>3162 | 0.0<br>508 | BTK,CD22,CD79A,FCGR2A,FCGR2B,FGFR3,FLT3,IGHM,INPP5J,PIK3R6                            |
| <b>IL-9 Signaling</b>                                            | 1.49 |                 | 0.0<br>851 | CISH,FGFR3,FLT3,PIK3R6                                                                |
| <b>IL-7 Signaling Pathway</b>                                    | 1.48 | 0               | 0.0<br>645 | CCND1,CXCR5,FGFR3,FLT3,IGHM,PIK3R6                                                    |
| <b>Role of IL-17A in Arthritis</b>                               | 1.47 |                 | 0.0<br>714 | CCL20,FGFR3,FLT3,MMP1,PIK3R6                                                          |
| <b>Reelin Signaling in Neurons</b>                               | 1.46 |                 | 0.0<br>638 | APBB1,APOE,ARHGEF4,FGFR3,FLT3,PIK3R6                                                  |
| <b>Wnt/<math>\beta</math>-catenin Signaling</b>                  | 1.45 | 1.41421<br>3562 | 0.0<br>52  | CCND1,CD44,DKK1,PPP2R2C,SFRP1,SOX15,SOX9,TCF7,WNT5A                                   |
| <b>eNOS Signaling</b>                                            | 1.44 | 0               | 0.0<br>517 | AQP2,AQP3,AQP4,AQP6,CASP8,FGFR3,FLT3,KNG1,PIK3R6                                      |
| <b>Guanosine Nucleotides Degradation III</b>                     | 1.43 |                 | 0.1<br>67  | NT5C3A,XDH                                                                            |
| <b>PEDF Signaling</b>                                            | 1.39 | 0.44721<br>3595 | 0.0<br>612 | CASP8,FGFR3,FLT3,PIK3R6,SFRP1,TCF7                                                    |
| <b>Urate Biosynthesis/Inosine 5'-phosphate Degradation</b>       | 1.37 |                 | 0.1<br>54  | NT5C3A,XDH                                                                            |
| <b>Granulocyte Adhesion and Diapedesis</b>                       | 1.37 |                 | 0.0<br>503 | CCL18,CCL20,CLDN4,CXCR4,FPR1,MMP1,MMP9,SELL,SELPLG                                    |
| <b>TREM1 Signaling</b>                                           | 1.36 | 1.34164<br>0786 | 0.0<br>667 | CASP5,CD86,FCGR2B,NLRP3,TLR5                                                          |
| <b>Colorectal Cancer Metastasis Signaling</b>                    | 1.35 | 1.41421<br>3562 | 0.0<br>449 | CCND1,FGFR3,FLT3,GRK3,MMP1,MMP9,PIK3R6,RHOBTB2,RHOQ,TCF7,TLR5,WNT5A                   |
| <b>Ovarian Cancer Signaling</b>                                  | 1.32 |                 | 0.0<br>516 | CCND1,CD44,FGFR3,FLT3,MMP9,PIK3R6,TCF7,WNT5A                                          |

Supplementary table 11. Raw data TUMOR ssGSEA analysis in the peritumoral fat cohort (appendix p 15).

| Immune Feature      | mean_Z_diff | pvalue | p.adjust | -LOG10(P) |
|---------------------|-------------|--------|----------|-----------|
| Tcm_cells           | 0.649       | 0.125  | 0.923    | 0.905     |
| Th2_cells           | 0.533       | 0.172  | 0.923    | 0.765     |
| DC                  | 0.525       | 0.283  | 0.923    | 0.548     |
| Tgd_cells           | 0.359       | 0.432  | 0.923    | 0.365     |
| aDC                 | 0.355       | 0.385  | 0.923    | 0.414     |
| ImmuneScore         | 0.326       | 0.615  | 0.923    | 0.211     |
| Neutrophils         | 0.297       | 0.560  | 0.923    | 0.252     |
| Mast_cells          | 0.283       | 0.560  | 0.923    | 0.252     |
| NK_CD56dim_cells    | 0.275       | 0.231  | 0.923    | 0.637     |
| Cytotoxic_cells     | 0.259       | 0.432  | 0.923    | 0.365     |
| Macrophages         | 0.246       | 0.615  | 0.923    | 0.211     |
| Treg_cells          | 0.217       | 0.888  | 0.989    | 0.051     |
| Eosinophils         | 0.206       | 0.587  | 0.923    | 0.231     |
| PDL1                | 0.202       | 0.934  | 0.989    | 0.030     |
| B_cells             | 0.146       | 1.000  | 1.000    | 0.000     |
| CYT                 | 0.126       | 0.763  | 0.989    | 0.117     |
| TIS                 | 0.117       | 0.888  | 0.989    | 0.051     |
| IIS                 | 0.088       | 0.888  | 0.989    | 0.051     |
| APM2                | 0.061       | 0.984  | 1.000    | 0.007     |
| T_helper_cells      | 0.046       | 0.794  | 0.989    | 0.100     |
| T_cells             | -0.042      | 0.888  | 0.989    | 0.051     |
| Tfh_cells           | -0.047      | 0.763  | 0.989    | 0.117     |
| ImmuneCheckpoint    | -0.085      | 0.733  | 0.989    | 0.135     |
| APM1                | -0.141      | 0.533  | 0.923    | 0.274     |
| CD8_T_cells         | -0.149      | 0.321  | 0.923    | 0.493     |
| Tem_cells           | -0.151      | 0.533  | 0.923    | 0.274     |
| PD1                 | -0.168      | 0.481  | 0.923    | 0.318     |
| Th1_cells           | -0.215      | 0.587  | 0.923    | 0.231     |
| iDC                 | -0.218      | 0.456  | 0.923    | 0.341     |
| CTLA4               | -0.235      | 0.456  | 0.923    | 0.341     |
| Teff_Score          | -0.246      | 0.432  | 0.923    | 0.365     |
| pDC                 | -0.270      | 0.920  | 0.989    | 0.036     |
| NK_CD56bright_cells | -0.386      | 0.506  | 0.923    | 0.296     |
| Angiogenesis        | -0.470      | 0.321  | 0.923    | 0.493     |
| Th17_cells          | -0.640      | 0.200  | 0.923    | 0.699     |
| NK_cells            | -0.769      | 0.215  | 0.923    | 0.668     |

Supplementary table 12. Raw data PNA ssGSEA analysis in the peritumoral fat cohort (appendix p 15).

| Immune Feature      | mean_Z_diff | pvalue | p.adjust | -LOG10(P) |
|---------------------|-------------|--------|----------|-----------|
| ImmuneScore         | 1.870       | 0.029  | 0.318    | 1.531     |
| Tgd_cells           | 1.716       | 0.029  | 0.318    | 1.531     |
| IIS                 | 1.627       | 0.015  | 0.318    | 1.833     |
| Teff_Score          | 1.474       | 0.088  | 0.318    | 1.054     |
| ImmuneCheckpoint    | 1.394       | 0.088  | 0.318    | 1.054     |
| TIS                 | 1.372       | 0.059  | 0.318    | 1.230     |
| T_cells             | 1.247       | 0.088  | 0.318    | 1.054     |
| APM2                | 1.175       | 0.176  | 0.424    | 0.753     |
| Cytotoxic_cells     | 1.173       | 0.132  | 0.367    | 0.878     |
| APM1                | 1.147       | 0.059  | 0.318    | 1.230     |
| Mast_cells          | 1.117       | 0.132  | 0.367    | 0.878     |
| NK_CD56dim_cells    | 1.016       | 0.368  | 0.602    | 0.435     |
| Neutrophils         | 0.992       | 0.176  | 0.424    | 0.753     |
| CYT                 | 0.985       | 0.132  | 0.367    | 0.878     |
| Th1_cells           | 0.981       | 0.088  | 0.318    | 1.054     |
| B_cells             | 0.934       | 0.059  | 0.318    | 1.230     |
| PD1                 | 0.929       | 0.368  | 0.602    | 0.435     |
| CD8_T_cells         | 0.900       | 0.294  | 0.588    | 0.531     |
| Macrophages         | 0.811       | 0.368  | 0.602    | 0.435     |
| T_helper_cells      | 0.807       | 0.235  | 0.498    | 0.628     |
| Th2_cells           | 0.796       | 0.235  | 0.498    | 0.628     |
| CTLA4               | 0.657       | 0.529  | 0.681    | 0.276     |
| Tem_cells           | 0.644       | 0.441  | 0.611    | 0.355     |
| PDL1                | 0.638       | 0.368  | 0.602    | 0.435     |
| Treg_cells          | 0.624       | 0.441  | 0.611    | 0.355     |
| Tfh_cells           | 0.469       | 0.441  | 0.611    | 0.355     |
| Eosinophils         | 0.466       | 0.941  | 0.941    | 0.026     |
| pDC                 | 0.458       | 0.529  | 0.681    | 0.276     |
| Angiogenesis        | 0.418       | 0.441  | 0.611    | 0.355     |
| aDC                 | 0.412       | 0.618  | 0.741    | 0.209     |
| Tcm_cells           | 0.226       | 0.721  | 0.837    | 0.142     |
| iDC                 | 0.179       | 0.824  | 0.898    | 0.084     |
| DC                  | 0.021       | 0.824  | 0.898    | 0.084     |
| Th17_cells          | -0.105      | 0.941  | 0.941    | 0.026     |
| NK_CD56bright_cells | -0.290      | 0.941  | 0.941    | 0.026     |
| NK_cells            | -0.538      | 0.618  | 0.741    | 0.209     |

Supplementary table 13. Raw data PNN ssGSEA analysis in the peritumoral fat cohort (appendix p 15).

| Immune Feature      | mean_Z_diff | pvalue  | p.adjust | -LOG10(P) |
|---------------------|-------------|---------|----------|-----------|
| APM2                | 1.827       | 0.00001 | 0.0003   | 5.073     |
| ImmuneScore         | 1.574       | 0.0002  | 0.0027   | 3.655     |
| Tem_cells           | 1.436       | 0.002   | 0.013    | 2.623     |
| IIS                 | 1.435       | 0.001   | 0.006    | 3.172     |
| Cytotoxic_cells     | 1.362       | 0.002   | 0.013    | 2.623     |
| Treg_cells          | 1.360       | 0.003   | 0.013    | 2.554     |
| B_cells             | 1.254       | 0.000   | 0.000    | 4.708     |
| APM1                | 1.236       | 0.011   | 0.035    | 1.947     |
| ImmuneCheckpoint    | 1.223       | 0.003   | 0.013    | 2.554     |
| TIS                 | 1.183       | 0.003   | 0.013    | 2.486     |
| Tgd_cells           | 1.104       | 0.006   | 0.021    | 2.232     |
| CYT                 | 1.061       | 0.013   | 0.035    | 1.893     |
| Neutrophils         | 1.038       | 0.016   | 0.039    | 1.790     |
| Teff_Score          | 0.988       | 0.013   | 0.035    | 1.893     |
| T_cells             | 0.967       | 0.025   | 0.054    | 1.595     |
| Th1_cells           | 0.962       | 0.031   | 0.063    | 1.504     |
| pDC                 | 0.922       | 0.014   | 0.037    | 1.841     |
| iDC                 | 0.808       | 0.023   | 0.051    | 1.642     |
| DC                  | 0.786       | 0.047   | 0.084    | 1.332     |
| Macrophages         | 0.785       | 0.038   | 0.073    | 1.416     |
| Tfh_cells           | 0.783       | 0.073   | 0.114    | 1.136     |
| PDL1                | 0.777       | 0.067   | 0.110    | 1.174     |
| aDC                 | 0.712       | 0.061   | 0.105    | 1.212     |
| CD8_T_cells         | 0.678       | 0.087   | 0.130    | 1.063     |
| PD1                 | 0.666       | 0.119   | 0.165    | 0.925     |
| Th2_cells           | 0.655       | 0.128   | 0.171    | 0.892     |
| Mast_cells          | 0.642       | 0.171   | 0.205    | 0.767     |
| Tcm_cells           | 0.606       | 0.223   | 0.251    | 0.652     |
| Eosinophils         | 0.588       | 0.159   | 0.198    | 0.797     |
| Angiogenesis        | 0.452       | 0.183   | 0.213    | 0.738     |
| T_helper_cells      | 0.306       | 0.528   | 0.576    | 0.277     |
| NK_CD56dim_cells    | 0.200       | 0.843   | 0.867    | 0.074     |
| CTLA4               | 0.152       | 0.843   | 0.867    | 0.074     |
| NK_CD56bright_cells | -0.079      | 0.900   | 0.900    | 0.046     |
| Th17_cells          | -0.567      | 0.159   | 0.198    | 0.797     |
| NK_cells            | -0.673      | 0.102   | 0.147    | 0.992     |

Supplementary table 14. Raw data OBESE ssGSEA analysis in the peritumoral fat cohort (appendix p 15).

| Immune Feature      | mean_Z_diff | pvalue | p.adjust | -LOG10(P) |
|---------------------|-------------|--------|----------|-----------|
| CD8_T_cells         | 0.903       | 0.002  | 0.043    | 2.624     |
| Eosinophils         | 0.870       | 0.002  | 0.043    | 2.624     |
| Th1_cells           | 0.594       | 0.035  | 0.316    | 1.455     |
| CTLA4               | 0.588       | 0.061  | 0.346    | 1.215     |
| Neutrophils         | 0.567       | 0.086  | 0.346    | 1.063     |
| Cytotoxic_cells     | 0.547       | 0.128  | 0.385    | 0.891     |
| ImmuneScore         | 0.531       | 0.033  | 0.316    | 1.479     |
| IIS                 | 0.496       | 0.086  | 0.346    | 1.063     |
| APM1                | 0.442       | 0.075  | 0.346    | 1.124     |
| PDL1                | 0.406       | 0.079  | 0.346    | 1.104     |
| pDC                 | 0.405       | 0.118  | 0.385    | 0.928     |
| APM2                | 0.394       | 0.184  | 0.474    | 0.734     |
| TIS                 | 0.382       | 0.345  | 0.539    | 0.463     |
| ImmuneCheckpoint    | 0.310       | 0.323  | 0.539    | 0.490     |
| B_cells             | 0.300       | 0.247  | 0.539    | 0.607     |
| Tem_cells           | 0.280       | 0.334  | 0.539    | 0.476     |
| Tfh_cells           | 0.269       | 0.313  | 0.539    | 0.504     |
| Th17_cells          | 0.260       | 0.489  | 0.652    | 0.311     |
| Treg_cells          | 0.254       | 0.391  | 0.587    | 0.408     |
| PD1                 | 0.238       | 0.413  | 0.589    | 0.384     |
| CYT                 | 0.229       | 0.425  | 0.589    | 0.371     |
| T_cells             | 0.225       | 0.572  | 0.710    | 0.243     |
| NK_CD56bright_cells | 0.160       | 0.293  | 0.539    | 0.533     |
| Th2_cells           | 0.131       | 0.834  | 0.883    | 0.079     |
| Angiogenesis        | 0.124       | 0.706  | 0.820    | 0.151     |
| Teff_Score          | 0.124       | 0.345  | 0.539    | 0.463     |
| aDC                 | 0.109       | 0.572  | 0.710    | 0.243     |
| Mast_cells          | 0.062       | 0.950  | 0.977    | 0.022     |
| DC                  | 0.042       | 0.983  | 0.983    | 0.007     |
| Tgd_cells           | -0.004      | 0.802  | 0.875    | 0.096     |
| iDC                 | -0.025      | 0.753  | 0.848    | 0.123     |
| Macrophages         | -0.112      | 0.706  | 0.820    | 0.151     |
| Tcm_cells           | -0.192      | 0.293  | 0.539    | 0.533     |
| T_helper_cells      | -0.306      | 0.323  | 0.539    | 0.490     |
| NK_CD56dim_cells    | -0.357      | 0.171  | 0.473    | 0.768     |
| NK_cells            | -0.433      | 0.104  | 0.373    | 0.985     |

Supplementary table 15. Raw data NORMAL ssGSEA analysis in the peritumoral fat cohort (appendix p 15).

| Immune Feature      | mean_Z_diff | pvalue | p.adjust | -LOG10(P) |
|---------------------|-------------|--------|----------|-----------|
| CTLA4               | 1.263       | 0.071  | 1.000    | 1.146     |
| Eosinophils         | 0.995       | 0.286  | 1.000    | 0.544     |
| CD8_T_cells         | 0.957       | 0.429  | 1.000    | 0.368     |
| Neutrophils         | 0.856       | 0.429  | 1.000    | 0.368     |
| Mast_cells          | 0.820       | 0.429  | 1.000    | 0.368     |
| Th17_cells          | 0.799       | 0.643  | 1.000    | 0.192     |
| Teff_Score          | 0.542       | 0.429  | 1.000    | 0.368     |
| Th1_cells           | 0.514       | 0.857  | 1.000    | 0.067     |
| PDL1                | 0.452       | 0.643  | 1.000    | 0.192     |
| Tgd_cells           | 0.428       | 0.643  | 1.000    | 0.192     |
| Th2_cells           | 0.416       | 1.000  | 1.000    | 0.000     |
| T_cells             | 0.258       | 0.857  | 1.000    | 0.067     |
| NK_CD56dim_cells    | 0.157       | 0.857  | 1.000    | 0.067     |
| PD1                 | 0.116       | 1.000  | 1.000    | 0.000     |
| ImmuneCheckpoint    | 0.115       | 0.857  | 1.000    | 0.067     |
| Angiogenesis        | 0.099       | 1.000  | 1.000    | 0.000     |
| TIS                 | 0.057       | 1.000  | 1.000    | 0.000     |
| IIS                 | -0.019      | 1.000  | 1.000    | 0.000     |
| NK_CD56bright_cells | -0.051      | 0.857  | 1.000    | 0.067     |
| Tfh_cells           | -0.101      | 1.000  | 1.000    | 0.000     |
| APM1                | -0.105      | 0.429  | 1.000    | 0.368     |
| T_helper_cells      | -0.143      | 1.000  | 1.000    | 0.000     |
| ImmuneScore         | -0.145      | 0.857  | 1.000    | 0.067     |
| pDC                 | -0.168      | 0.857  | 1.000    | 0.067     |
| Cytotoxic_cells     | -0.193      | 0.643  | 1.000    | 0.192     |
| NK_cells            | -0.306      | 0.857  | 1.000    | 0.067     |
| CYT                 | -0.330      | 0.857  | 1.000    | 0.067     |
| Macrophages         | -0.391      | 0.643  | 1.000    | 0.192     |
| Treg_cells          | -0.421      | 1.000  | 1.000    | 0.000     |
| B_cells             | -0.518      | 0.643  | 1.000    | 0.192     |
| aDC                 | -0.601      | 0.857  | 1.000    | 0.067     |
| Tcm_cells           | -0.733      | 0.643  | 1.000    | 0.192     |
| Tem_cells           | -0.844      | 0.286  | 1.000    | 0.544     |
| iDC                 | -0.922      | 0.429  | 1.000    | 0.368     |
| DC                  | -0.961      | 0.429  | 1.000    | 0.368     |
| APM2                | -1.216      | 0.071  | 1.000    | 1.146     |
